# Supplementary material for: Utilizing Estra-1,3,5,16-Tetraene Scaffold: Design and Synthesis of Nitric Oxide Donors as Chemotherapeutic Resistance Combating Agents in Liver Cancer
Source: MDPI journal article supplement (doi:10.3390/molecules28062754), 2023-03-18
Supplement: s1 [file s1]

# Utilizing Estra-1,3,5,16-tetraene Scaffold: Design and Synthesis of Nitric Oxide Donors as Chemotherapeutic Resistance Combating Agents in Liver Cancer

Mahrous A. Abou-Salim <sup>1\*</sup>, Mohamed A. Shaaban <sup>2</sup>, Mohammed K. Abd El Hameid <sup>2</sup>,  
Mohammed M. Alanazi <sup>3</sup>, Fathi Halaweish <sup>4</sup>, and Yaseen A.M.M. Elshaier <sup>5</sup>

## 1 Spectral data

### 1.1 Compound 7

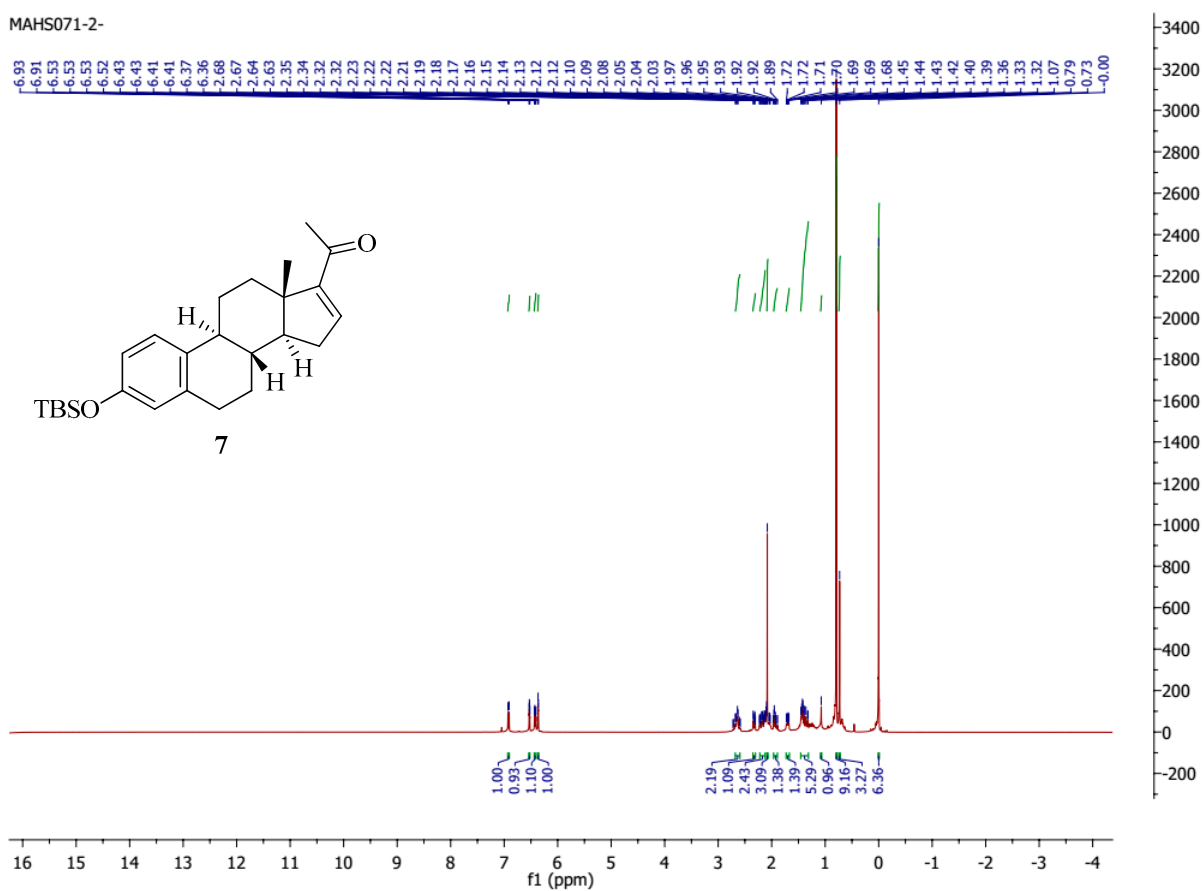

Figure S 1. <sup>1</sup>H NMR of compound 7.

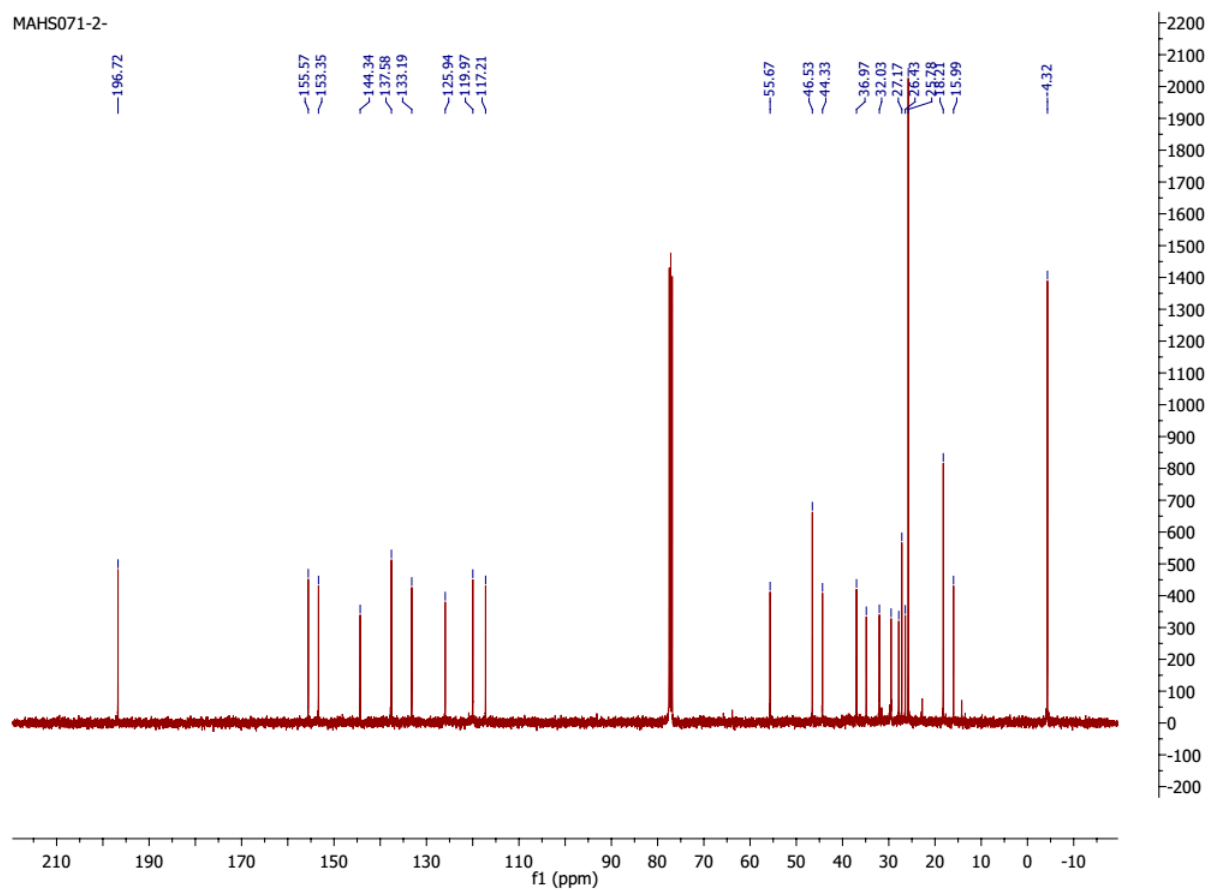

**Figure S 2.**  $^{13}\text{C}$  NMR of compound **7**.

## 1.2 Compound 8

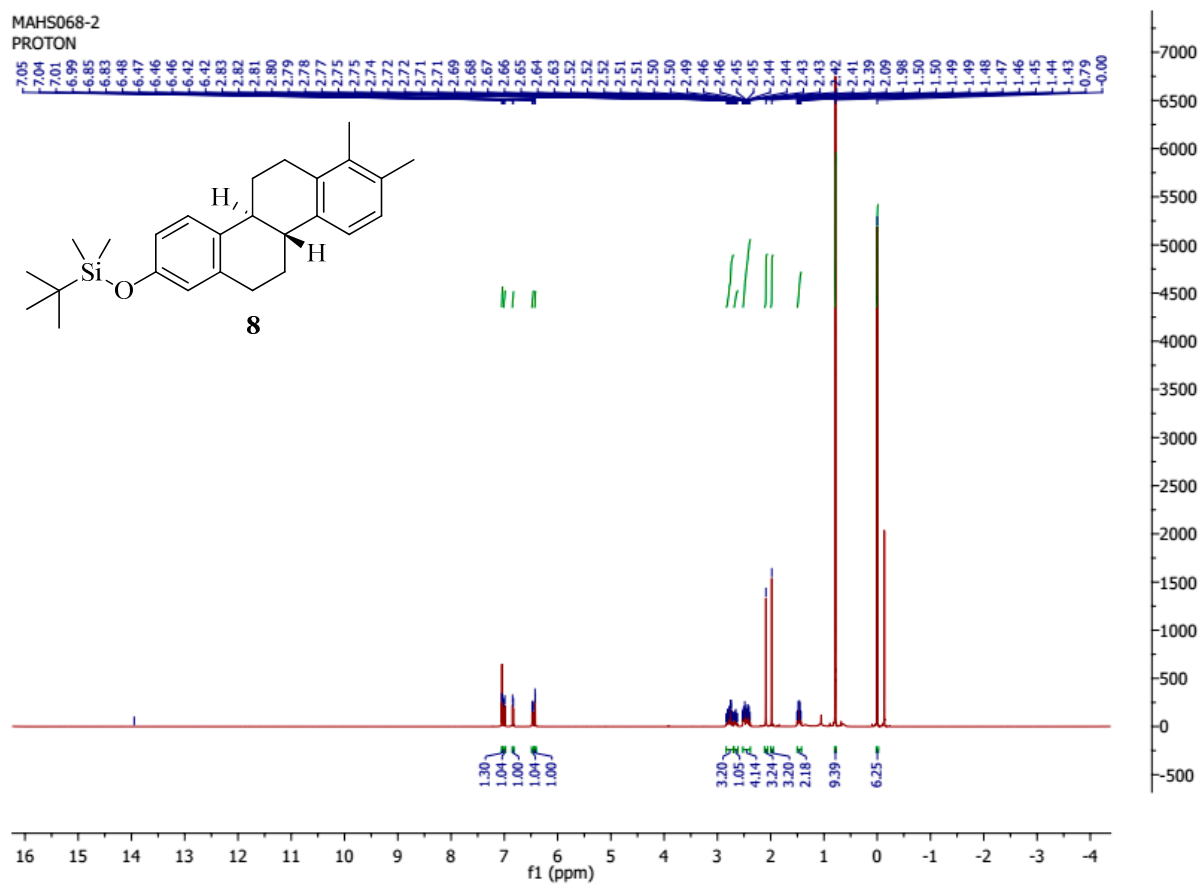

Figure S 3.  $^1\text{H}$  NMR of compound 8.

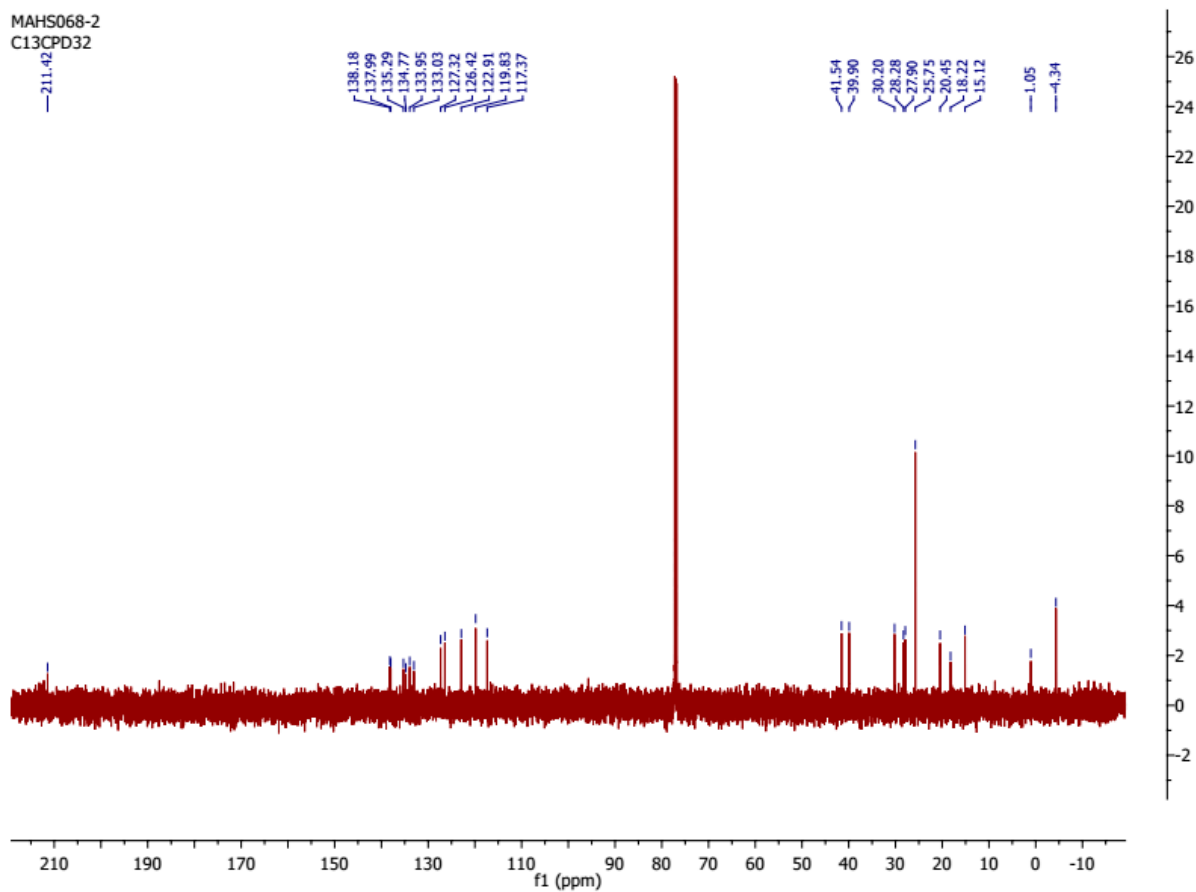

**Figure S 4.**  $^{13}\text{C}$  NMR of compound **8**.

MAHS068-2  
C13DEPT135

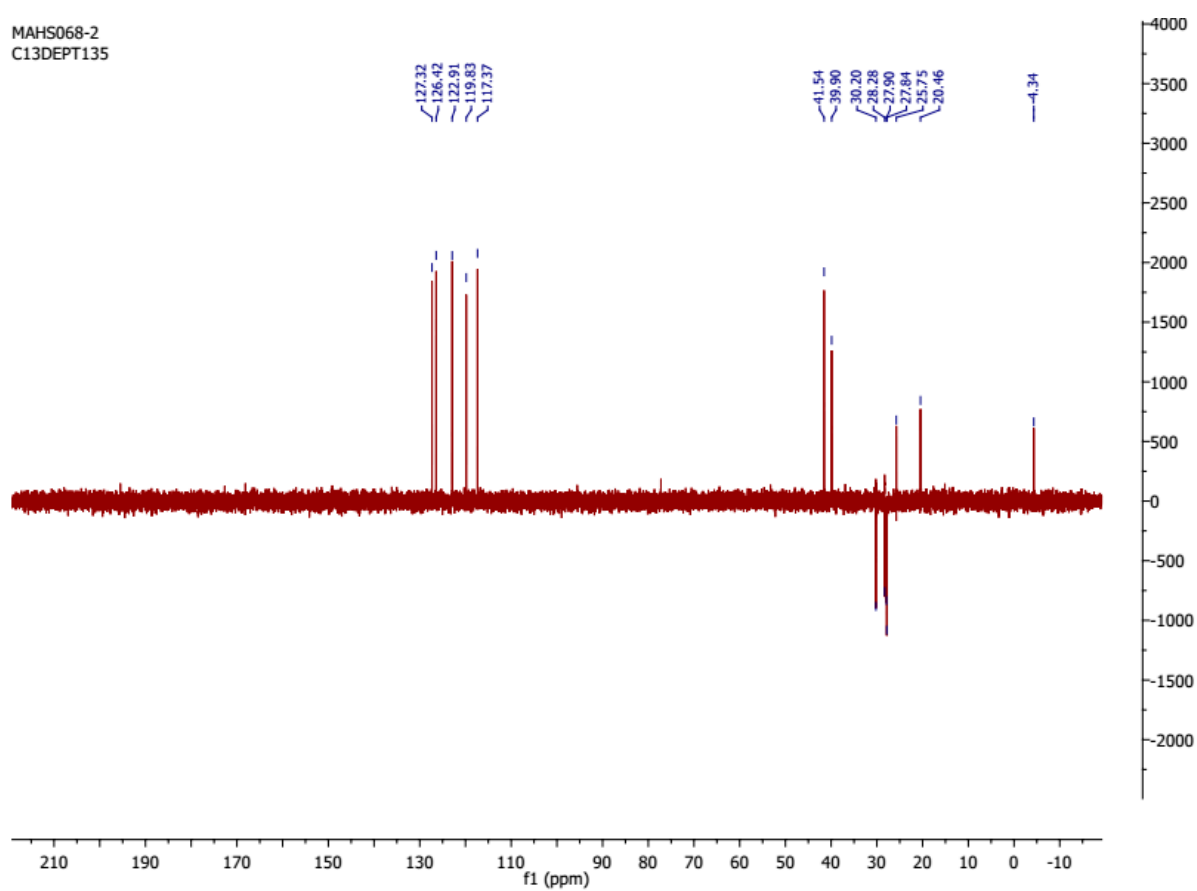

**Figure S 5.** DEPT135  $^{13}\text{C}$  NMR of compound **8**.

### 1.3 Compound 9

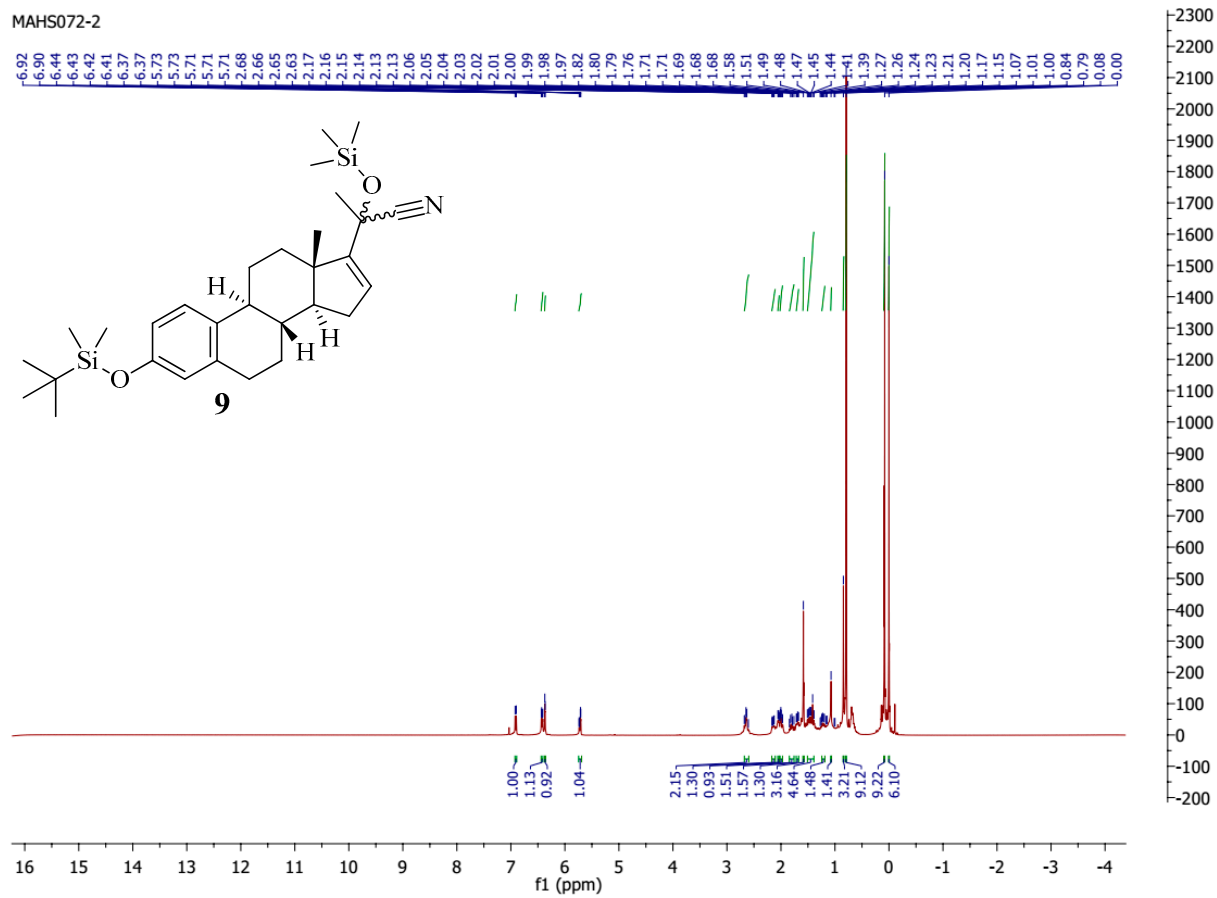

Figure S 6.  $^1\text{H}$  NMR of compound 9.

MAHS072-2

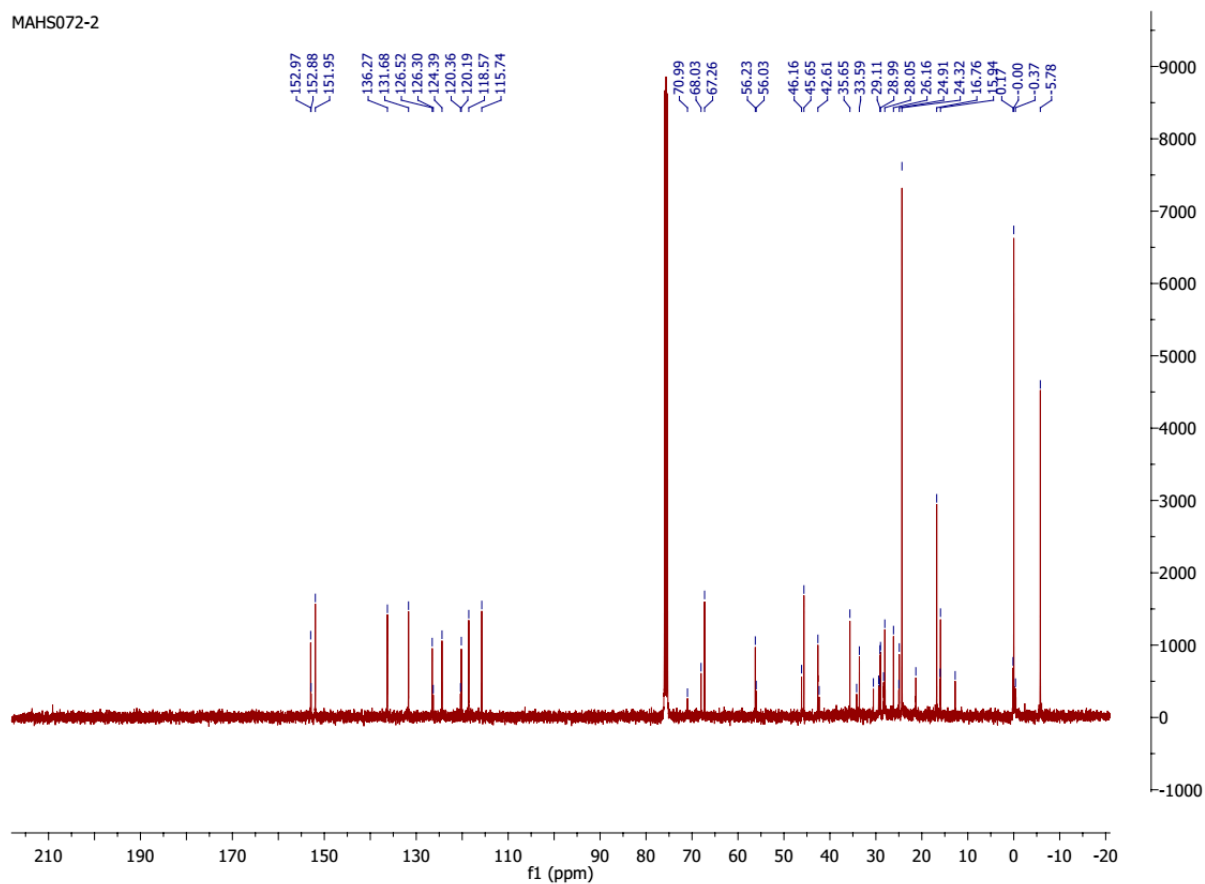

**Figure S 7.**  $^{13}\text{C}$  NMR of compound **9**.

## 1.4 Compound 10

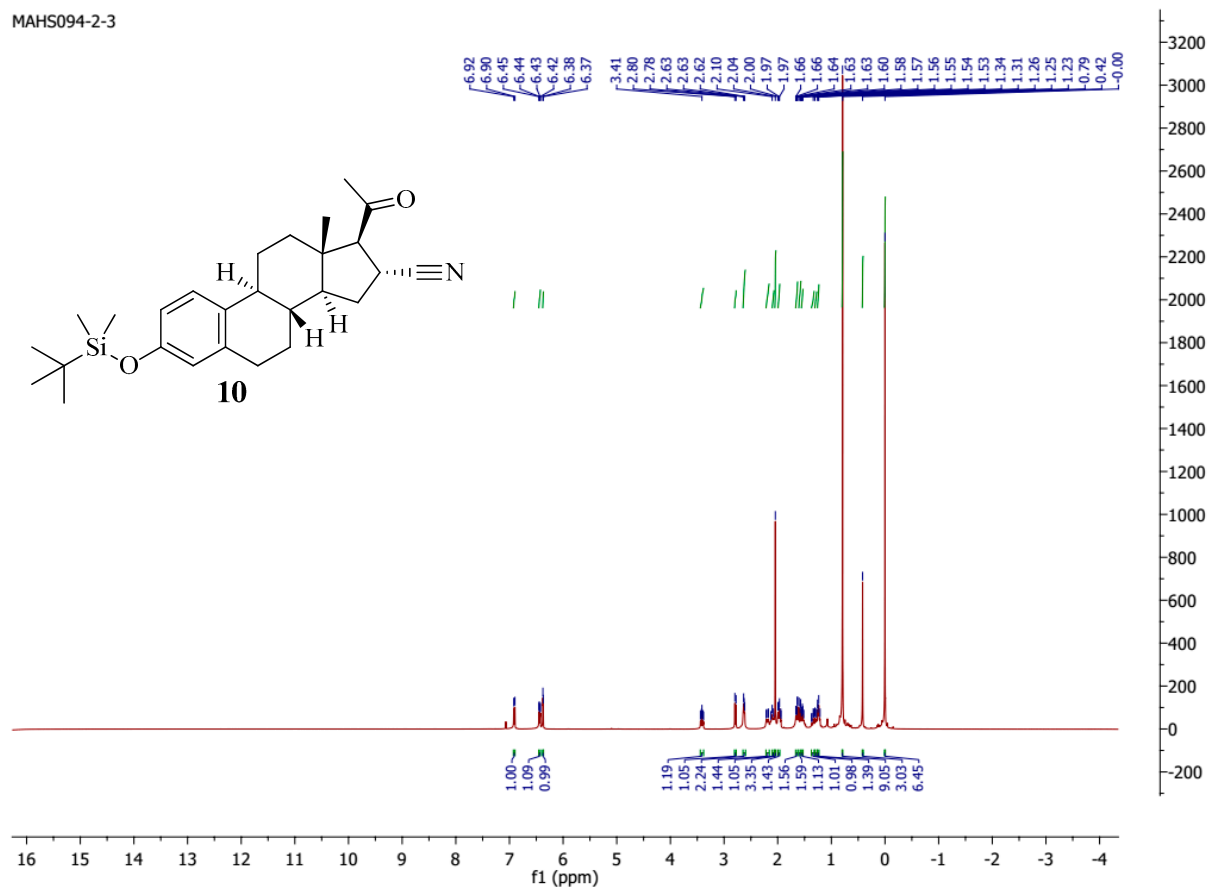

Figure S 8.  $^1\text{H}$  NMR of compound 10.



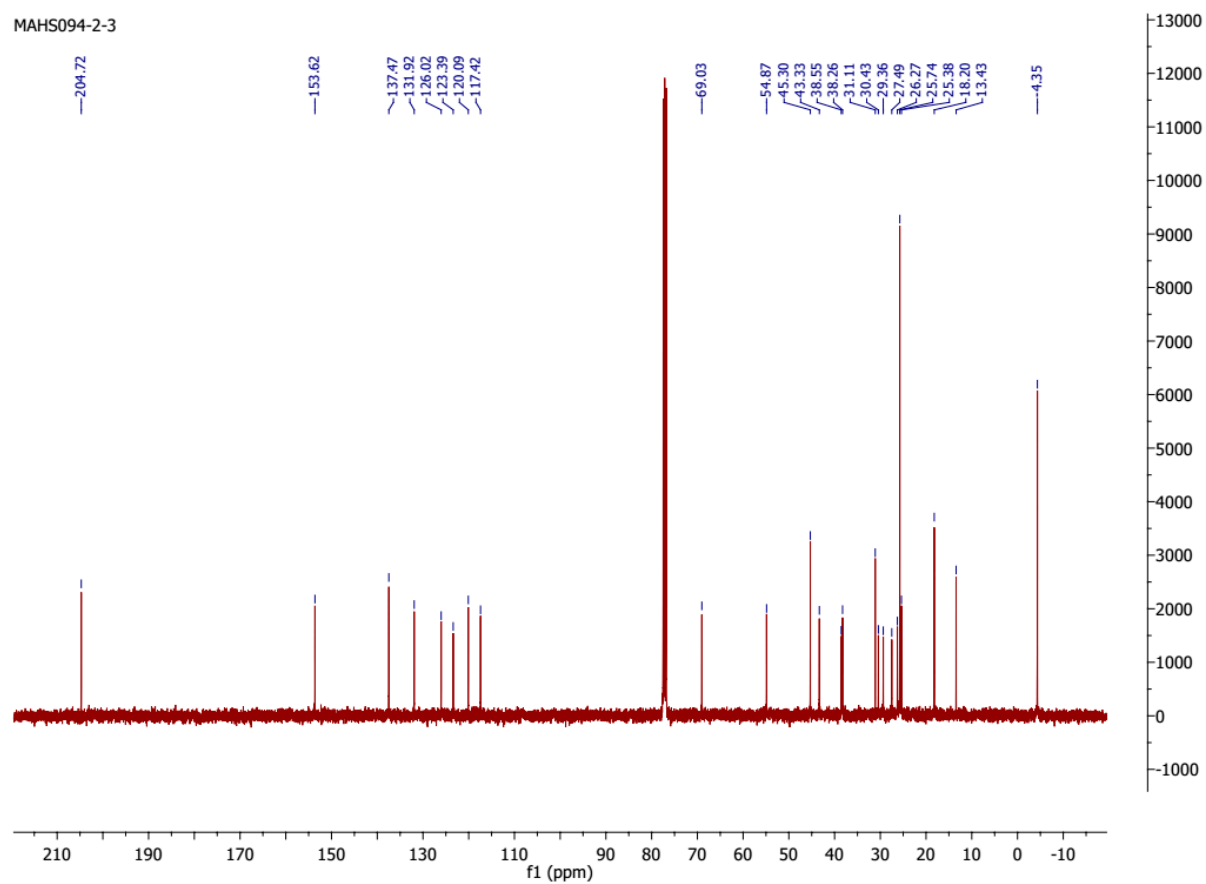

**Figure S 9.**  $^{13}\text{C}$  NMR of compound **10**.

## 1.5 Compound 11a

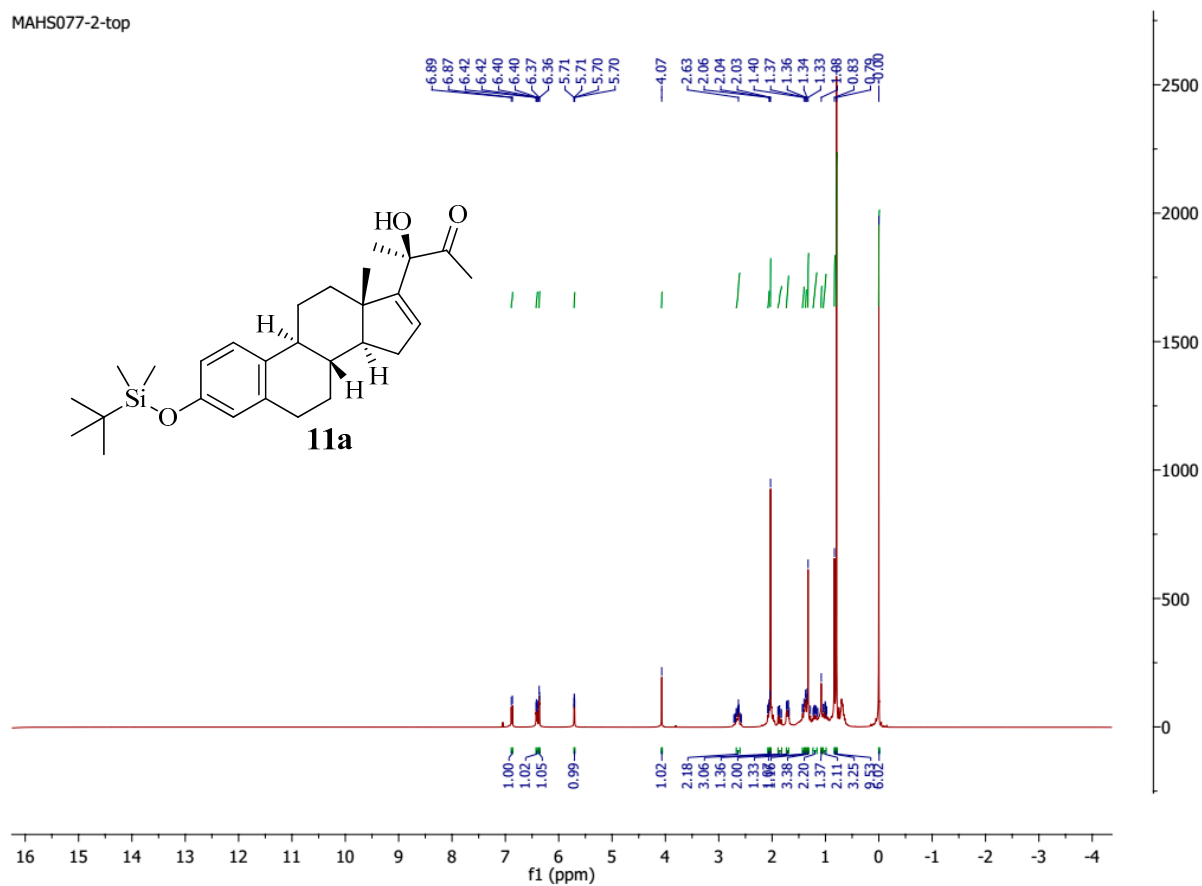

**Figure S 10.**  $^1\text{H}$  NMR of compound **11a**.

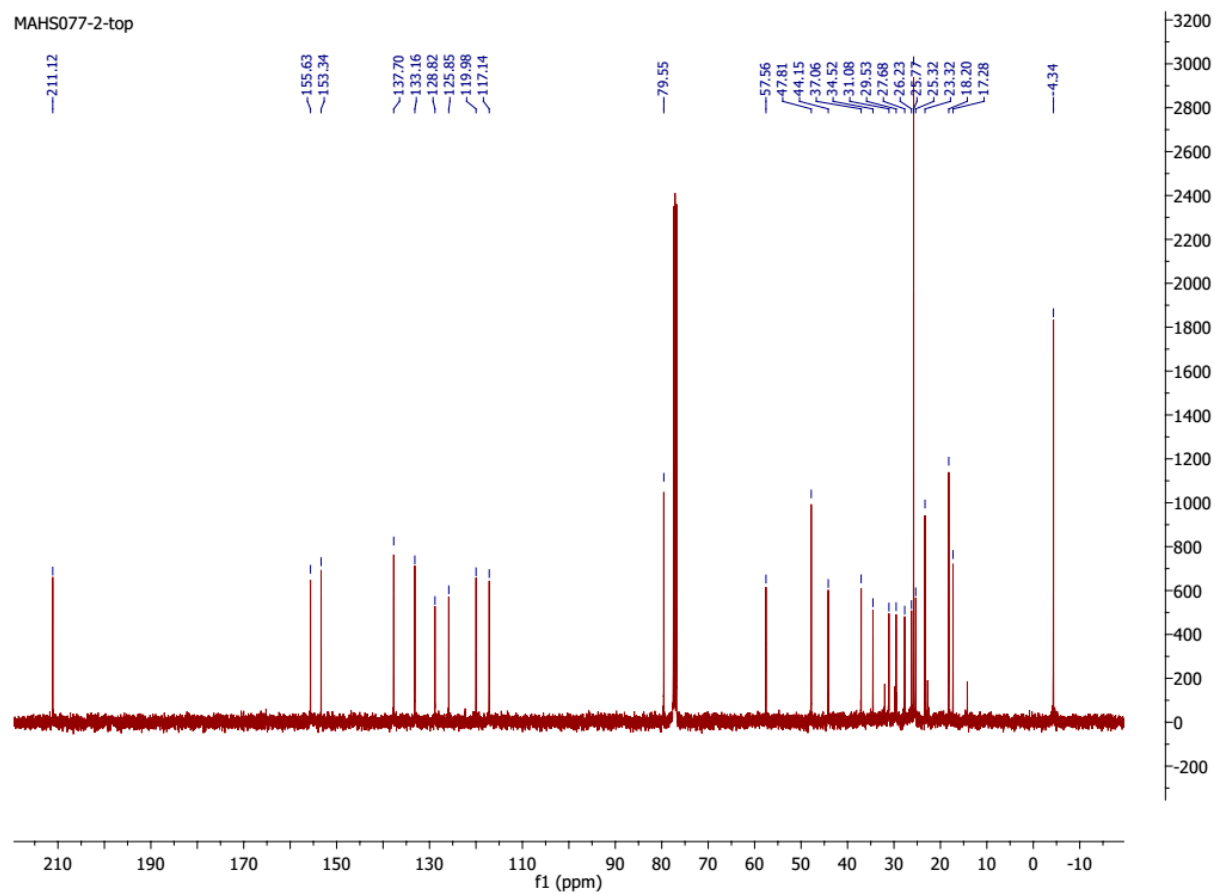

**Figure S 11.**  $^{13}\text{C}$  NMR of compound **11a**.

## 1.6 Compound 11b

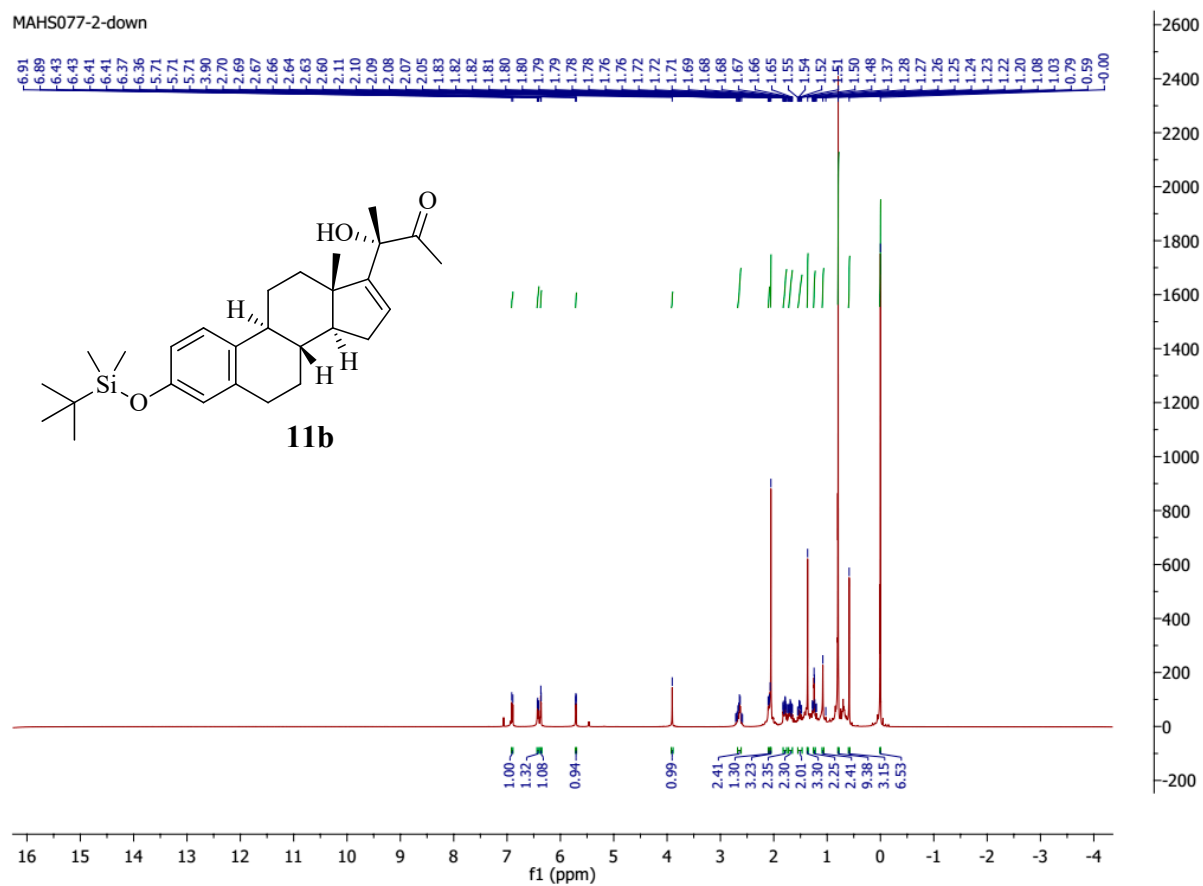

Figure S 12.  $^1\text{H}$  NMR of compound **11b**.

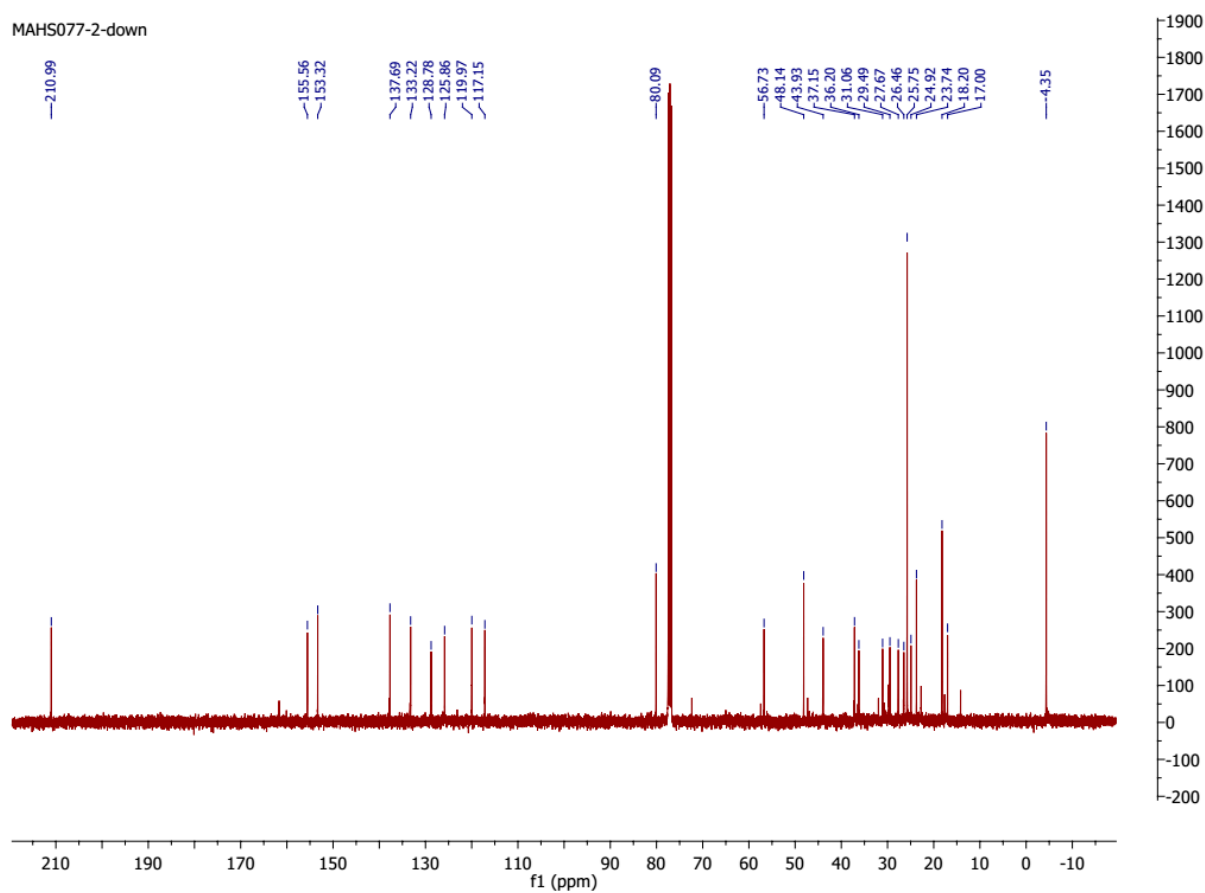

**Figure S 13.**  $^{13}\text{C}$  NMR of compound **11b**.

## 1.7 Compound 12a

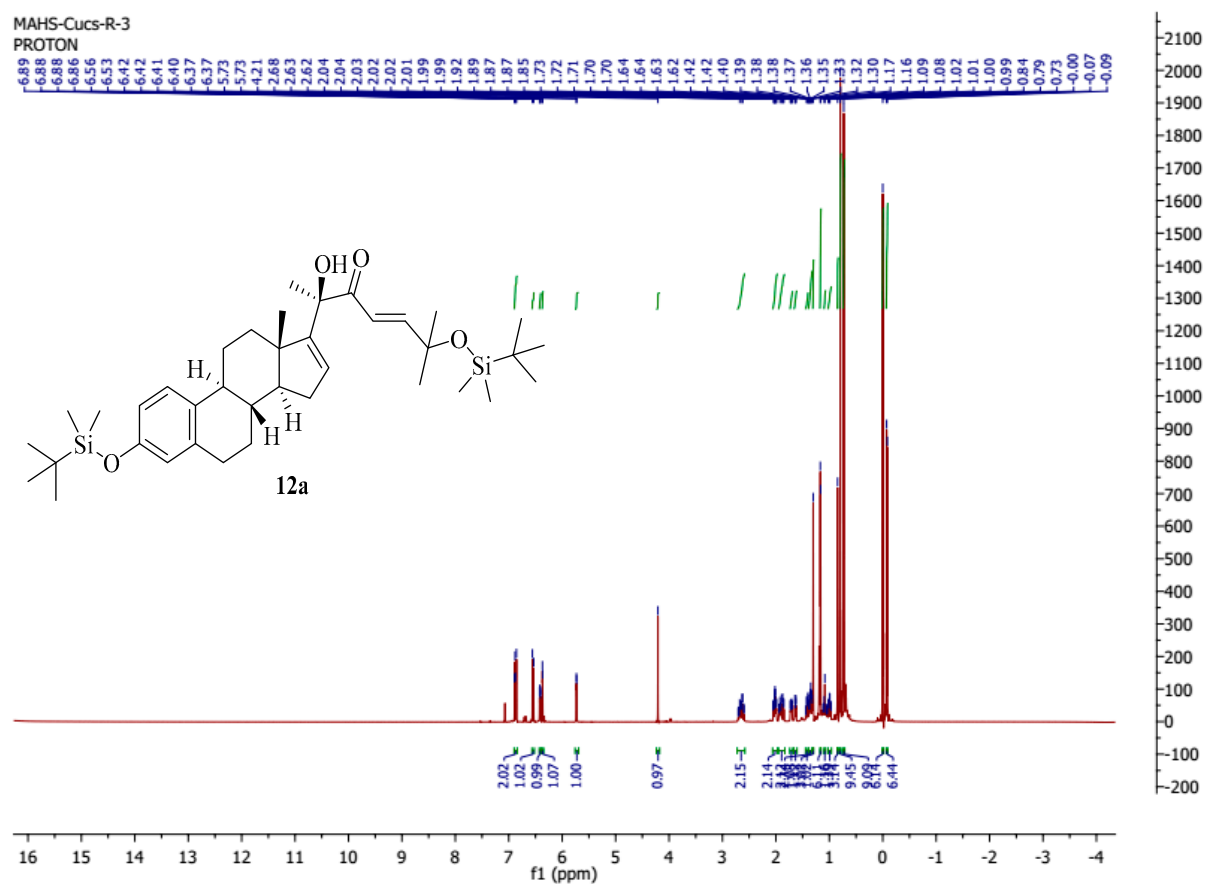

Figure S 14.  $^1\text{H}$  NMR of compound 12a.

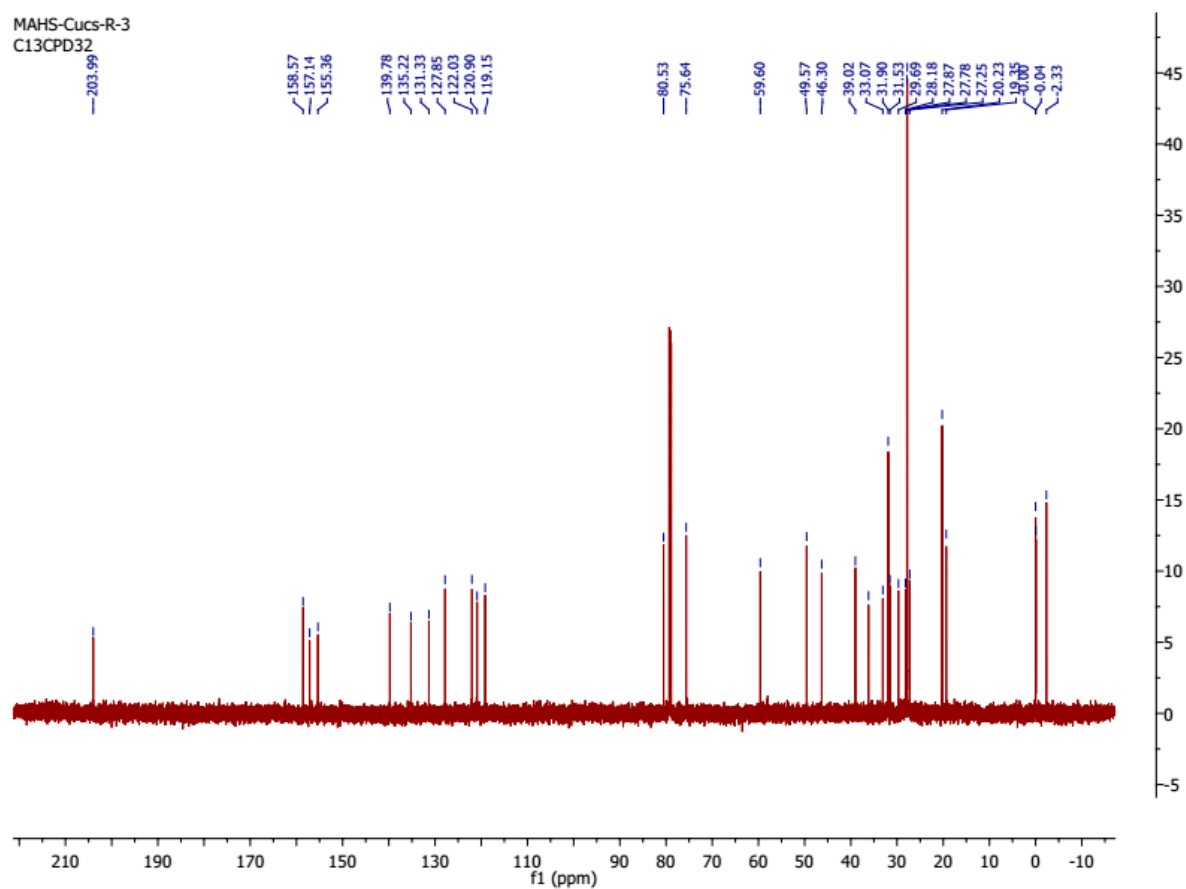

Figure S 15.  $^{13}\text{C}$  NMR of compound **12a**.

## 1.8 Compound 12b

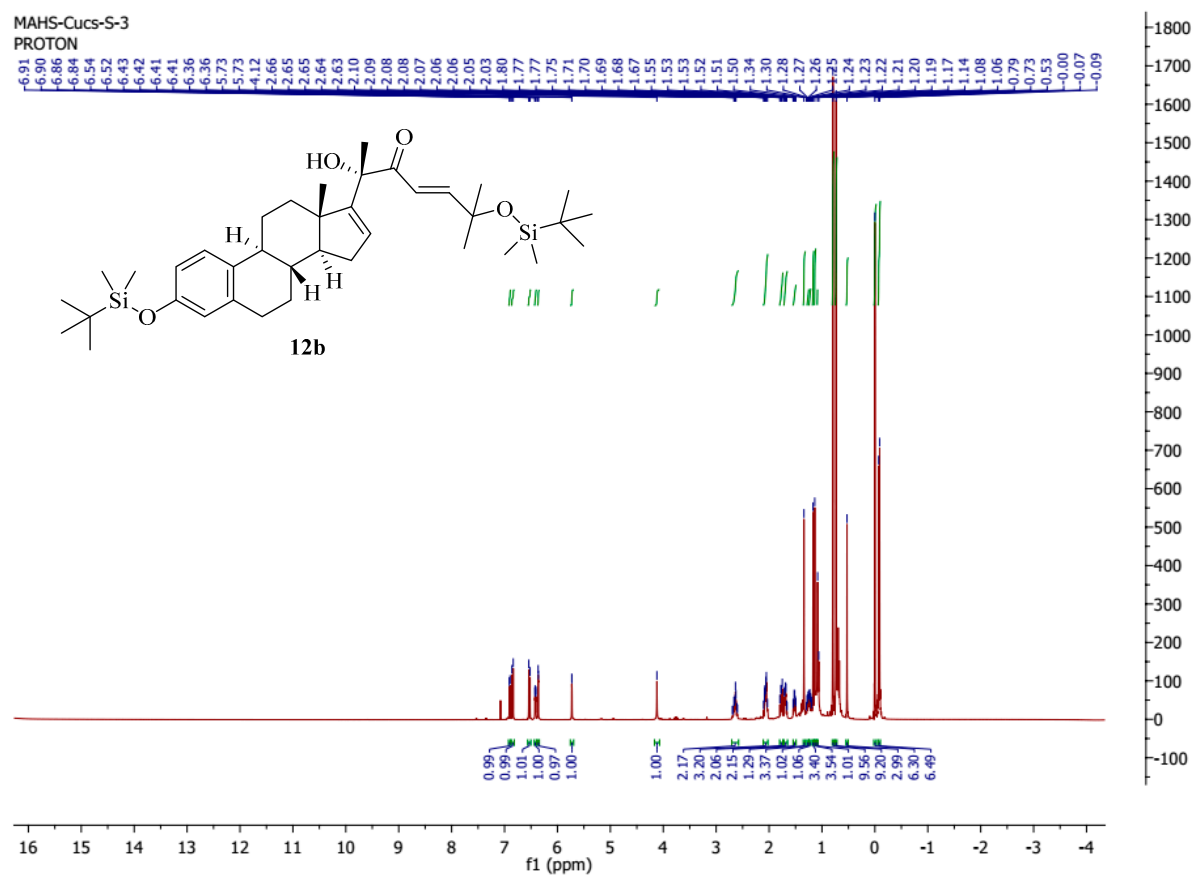

Figure S 16.  $^1\text{H}$  NMR of compound 12b.



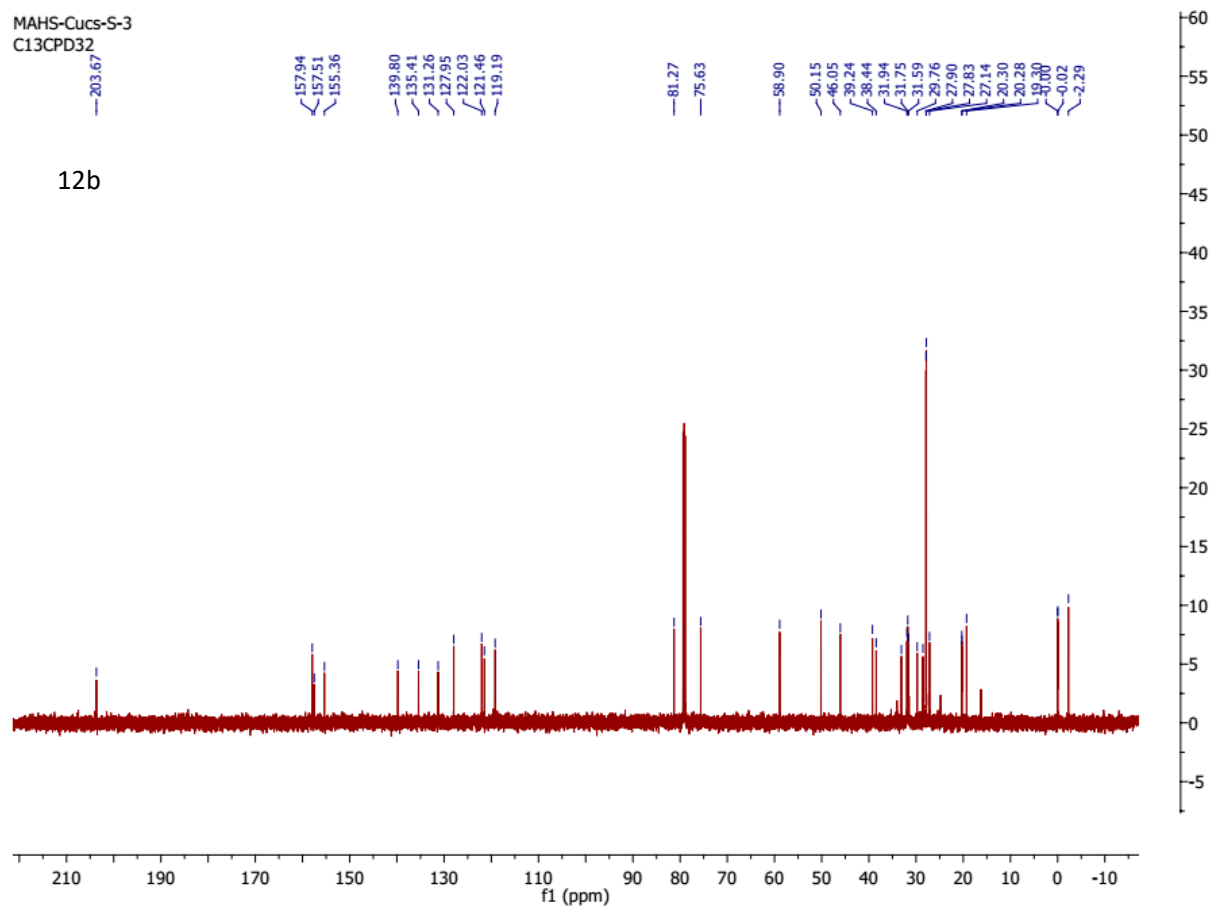

**Figure S 17.**  $^{13}\text{C}$  NMR of compound **12b**.

## 1.9 Compound 13a

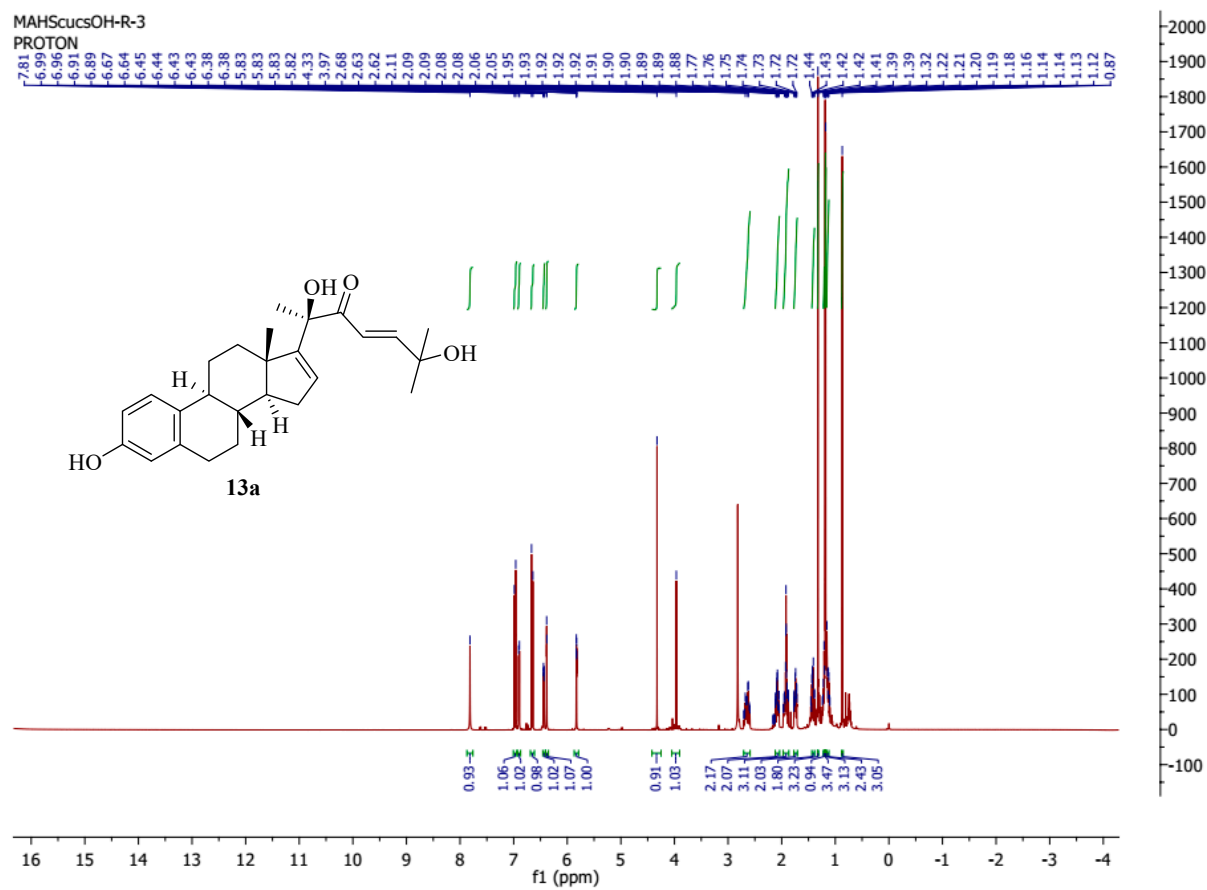

Figure S 18.  $^1\text{H}$  NMR of compound **13a**.

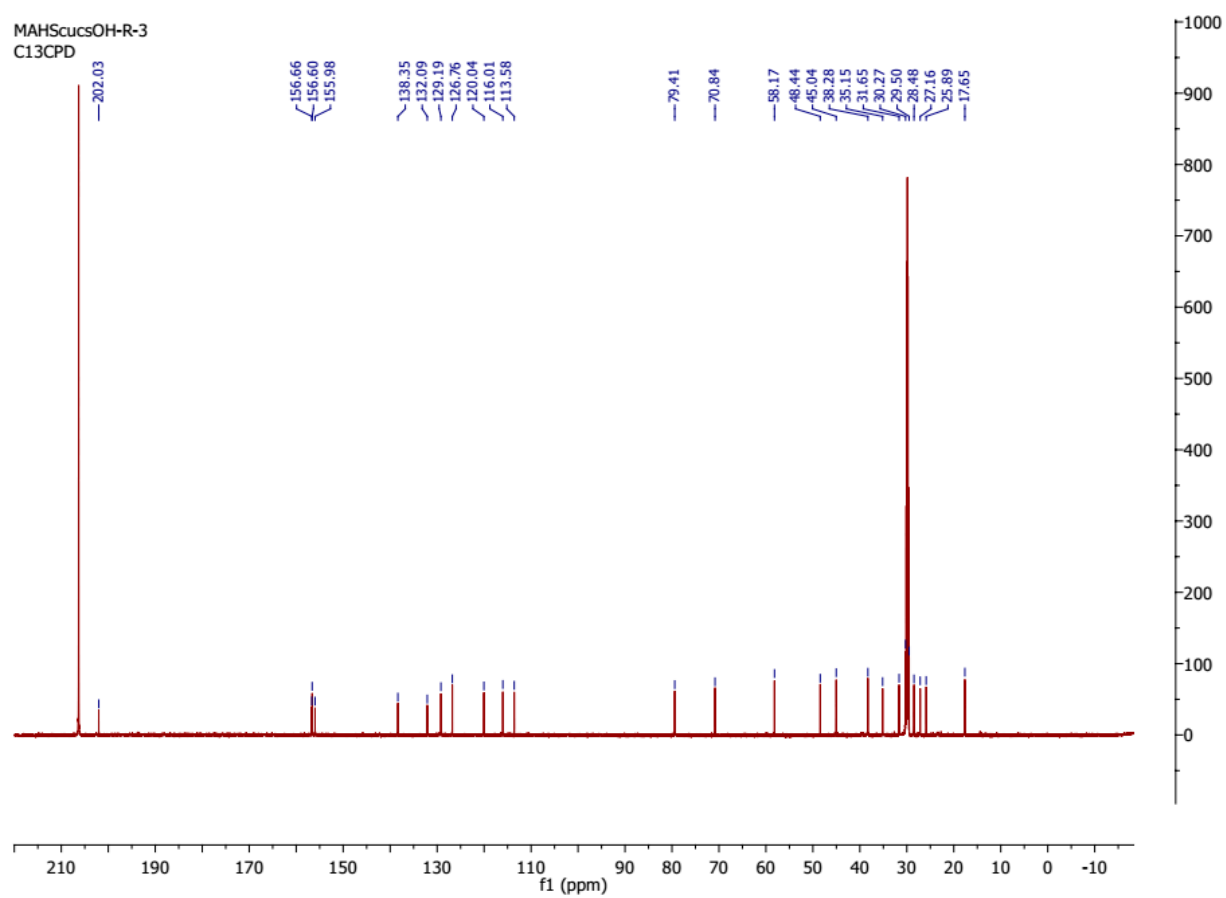

**Figure S 19.**  $^{13}\text{C}$  NMR of compound **13a**.

**Figure S 20.**  $^1\text{H}$  NMR of compound **13b**.

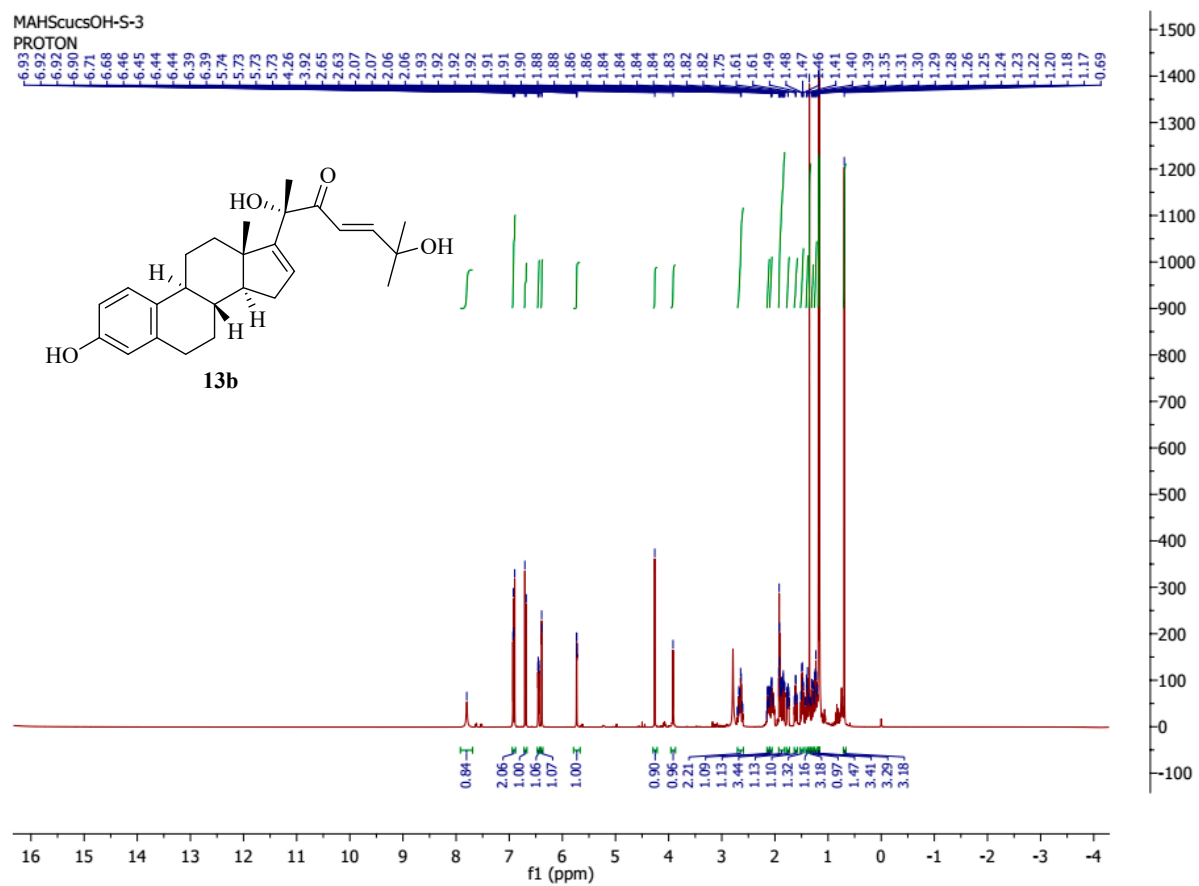

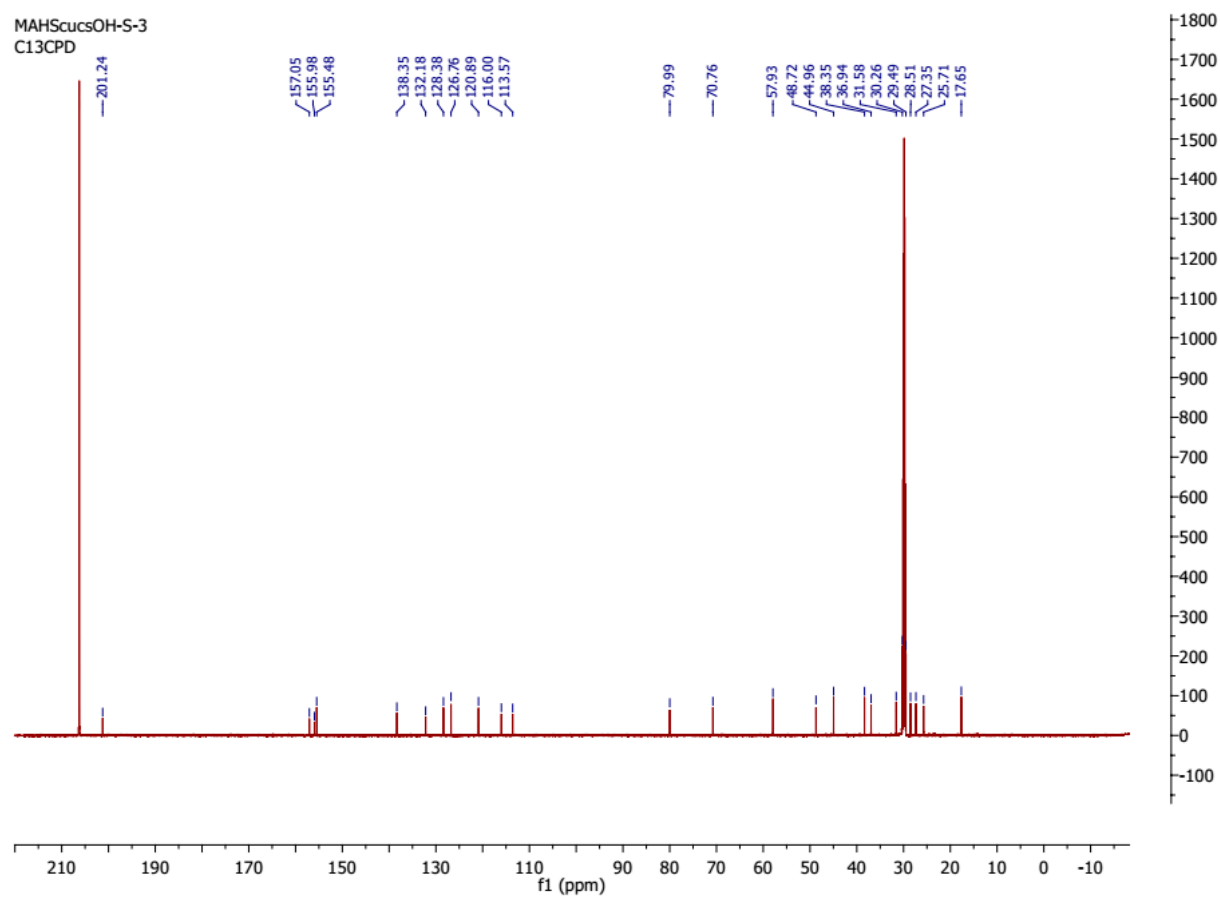

Figure S 21.  $^{13}\text{C}$  NMR of compound **13b**.

## 1.11 Compound 14a

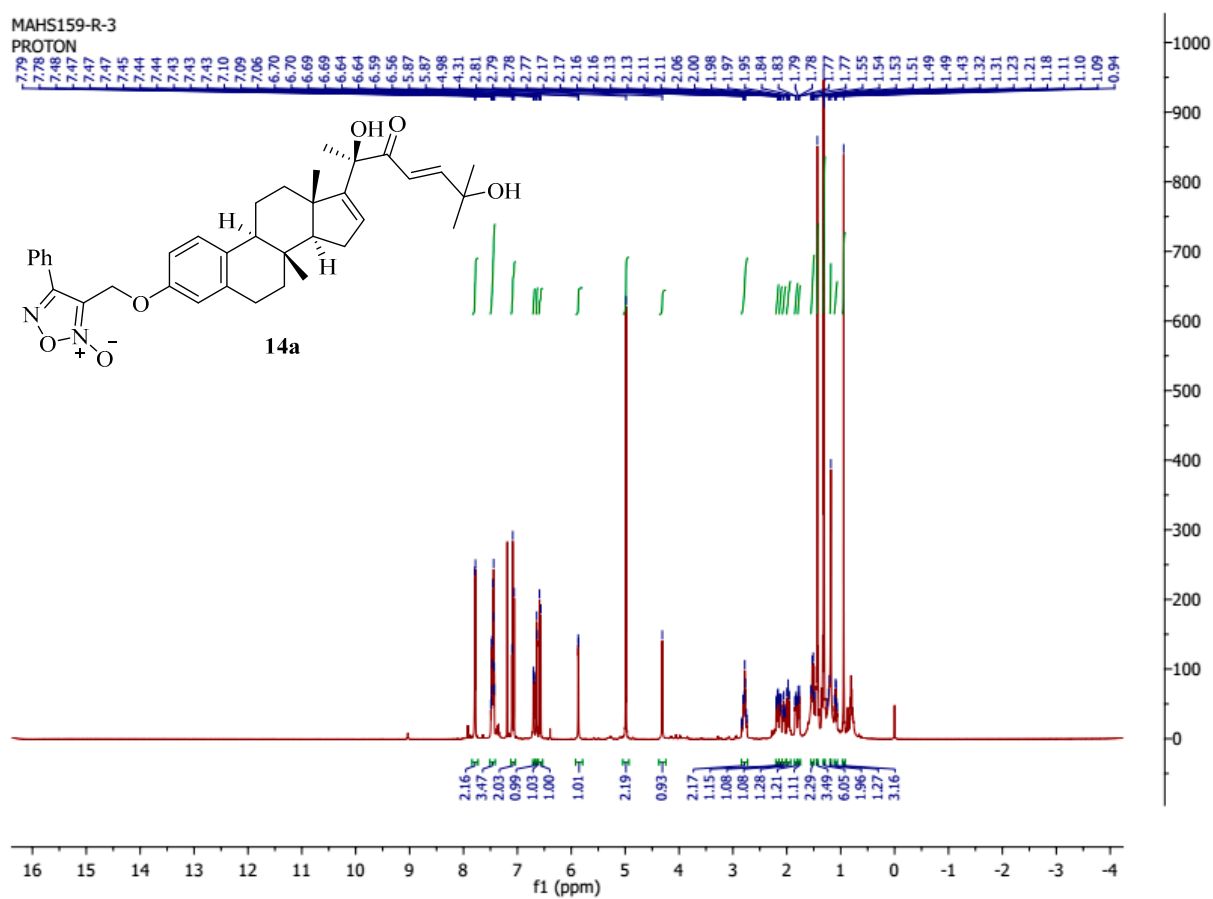

Figure S 22.  $^1\text{H}$  NMR of compound 14a.

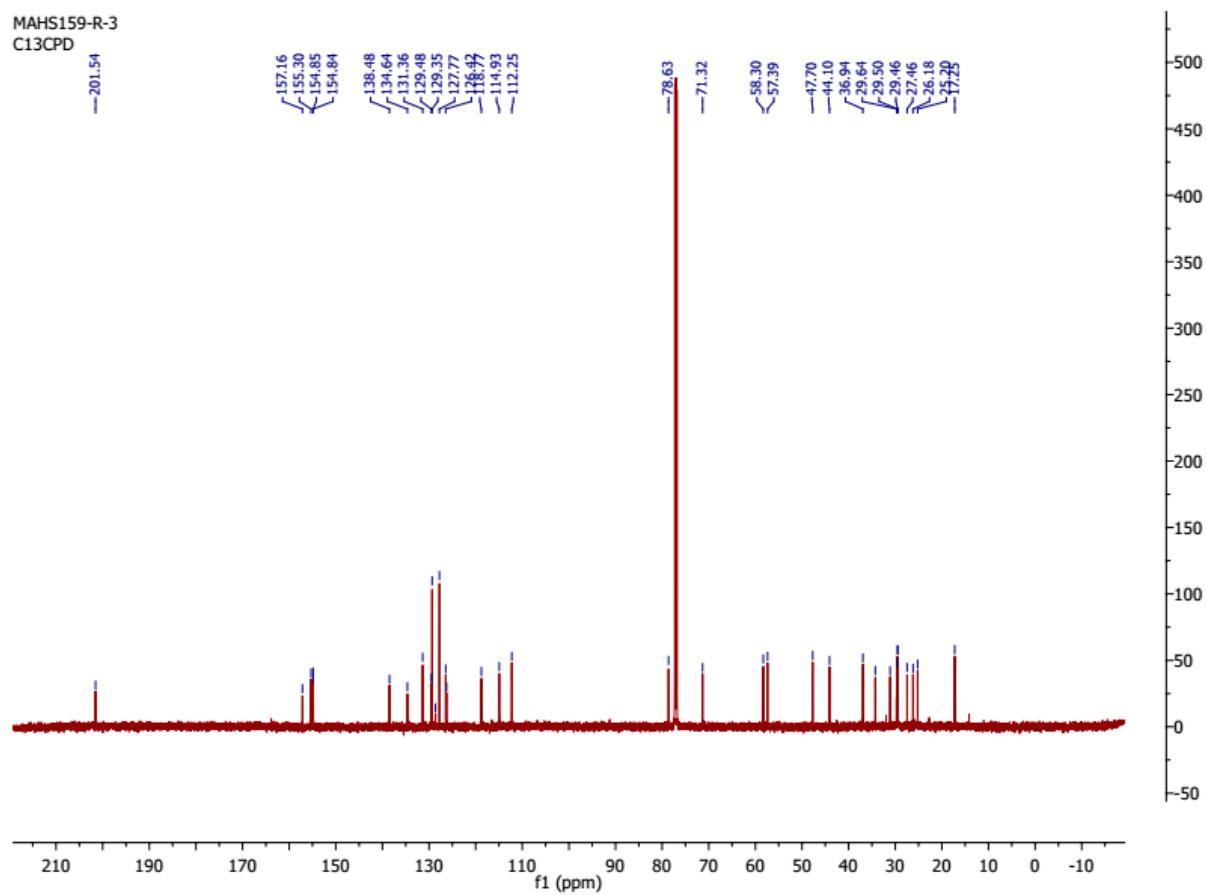

**Figure S 23.**  $^{13}\text{C}$  NMR of compound **14a**.

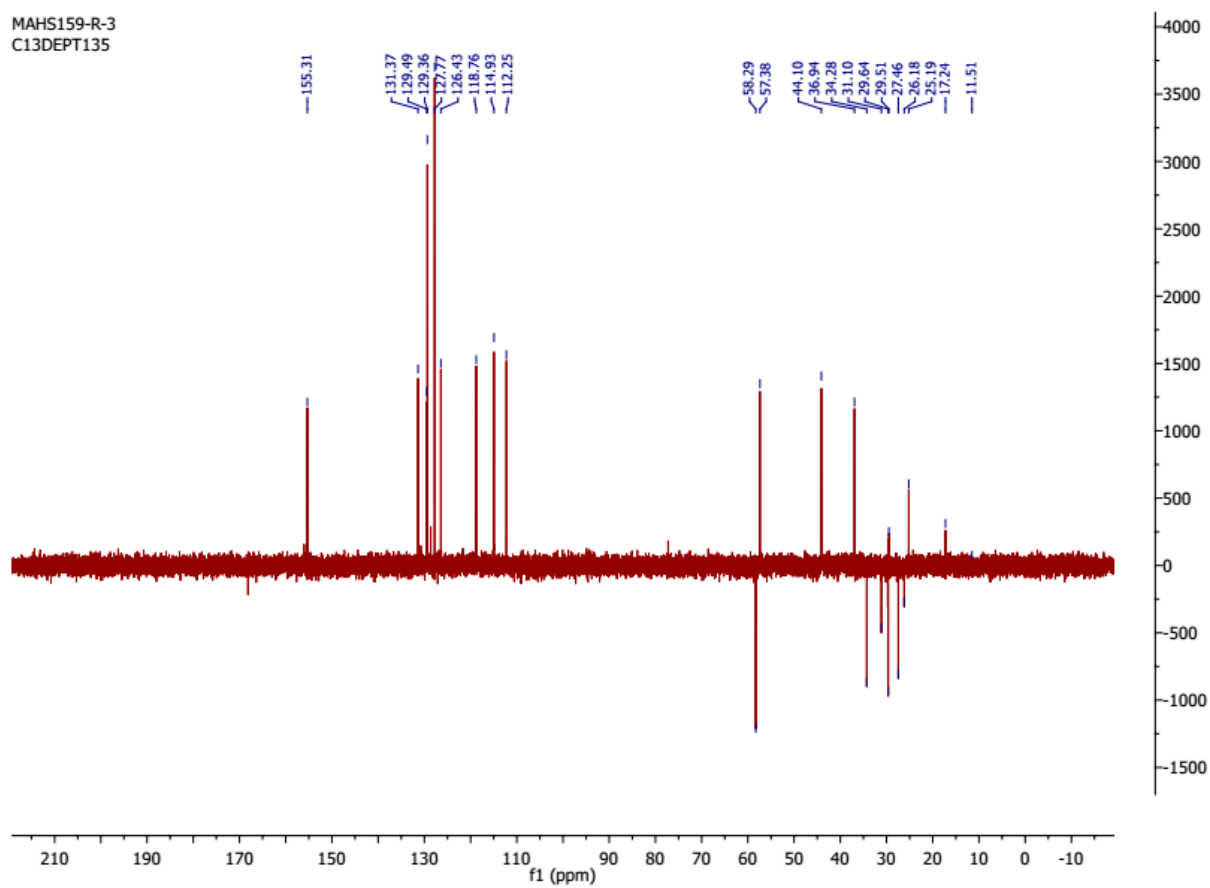

**Figure S 24.** DEPT135  $^{13}\text{C}$  NMR of compound **14a**.



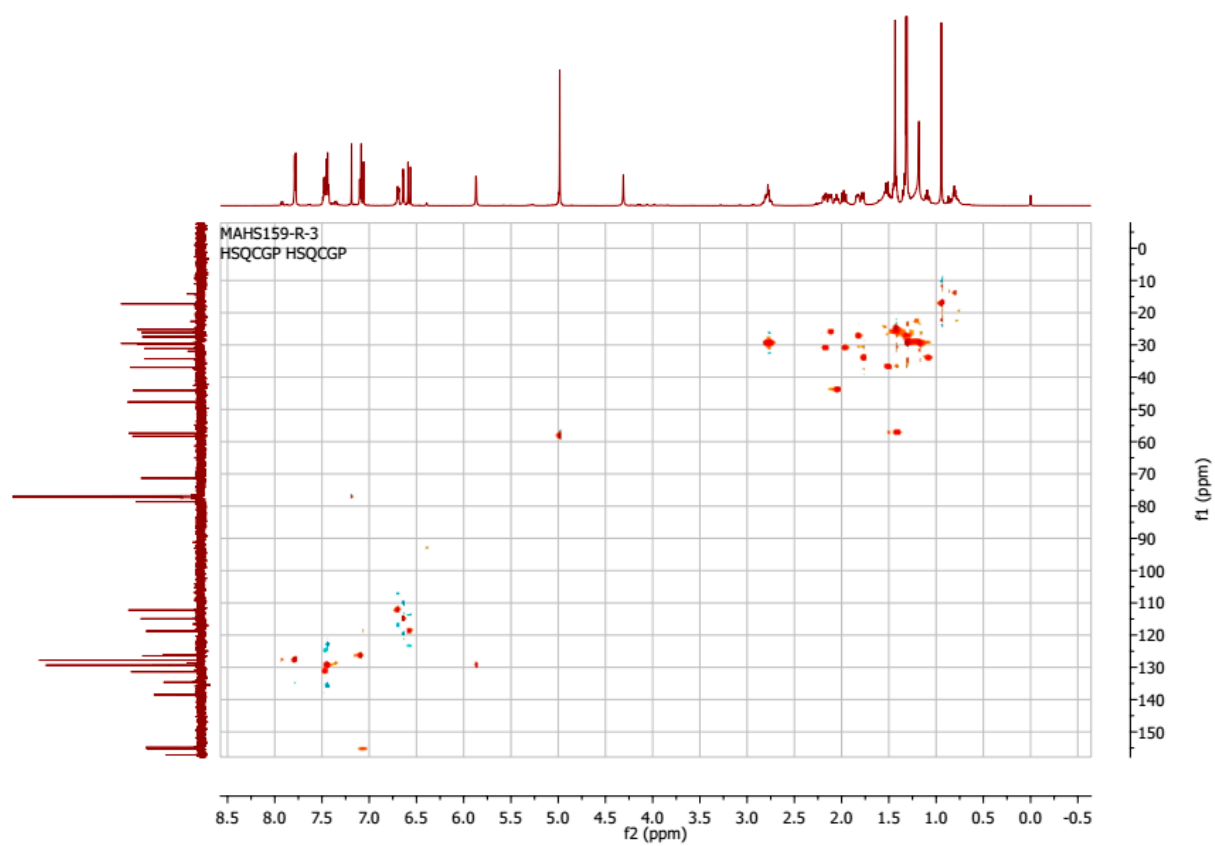

**Figure S 25.** HSQC GP of compound **14a**.

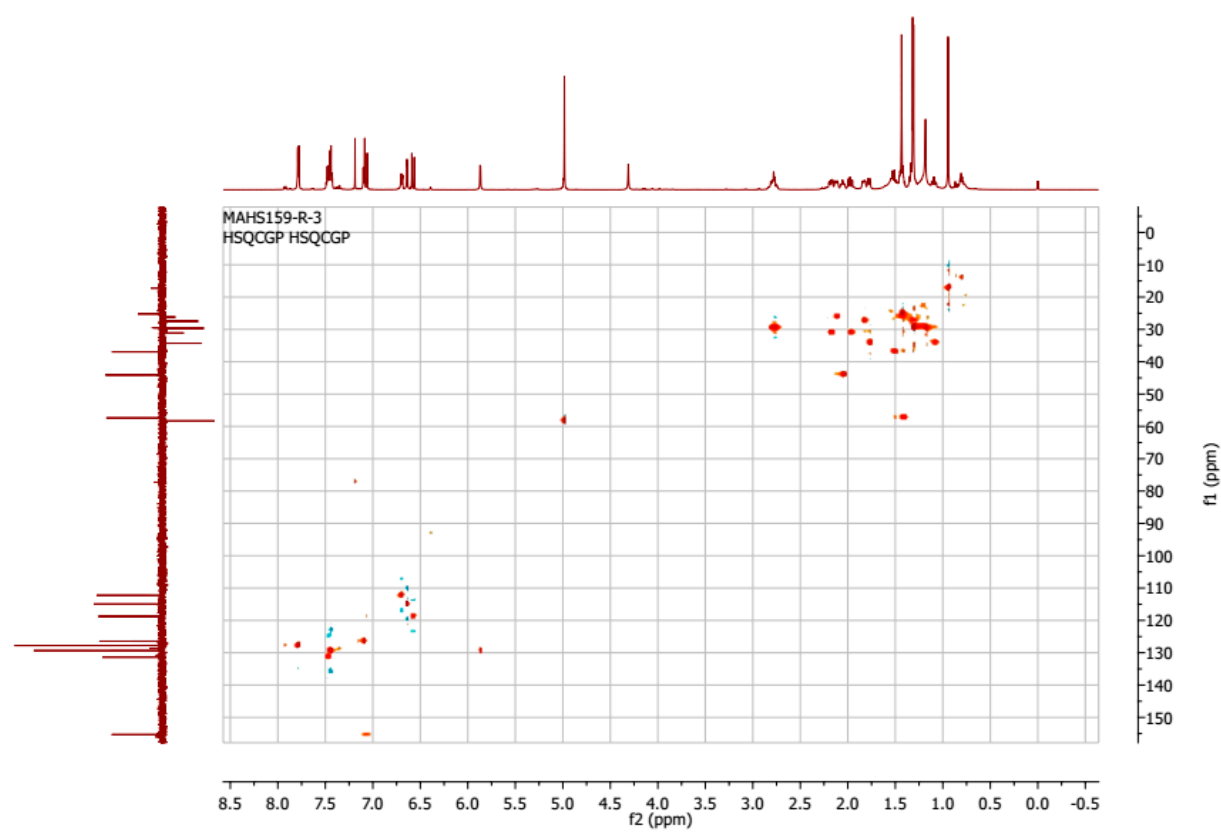

**Figure S 26.** HSQCGP of compound **14a**.

## 1.12 Compound 14b

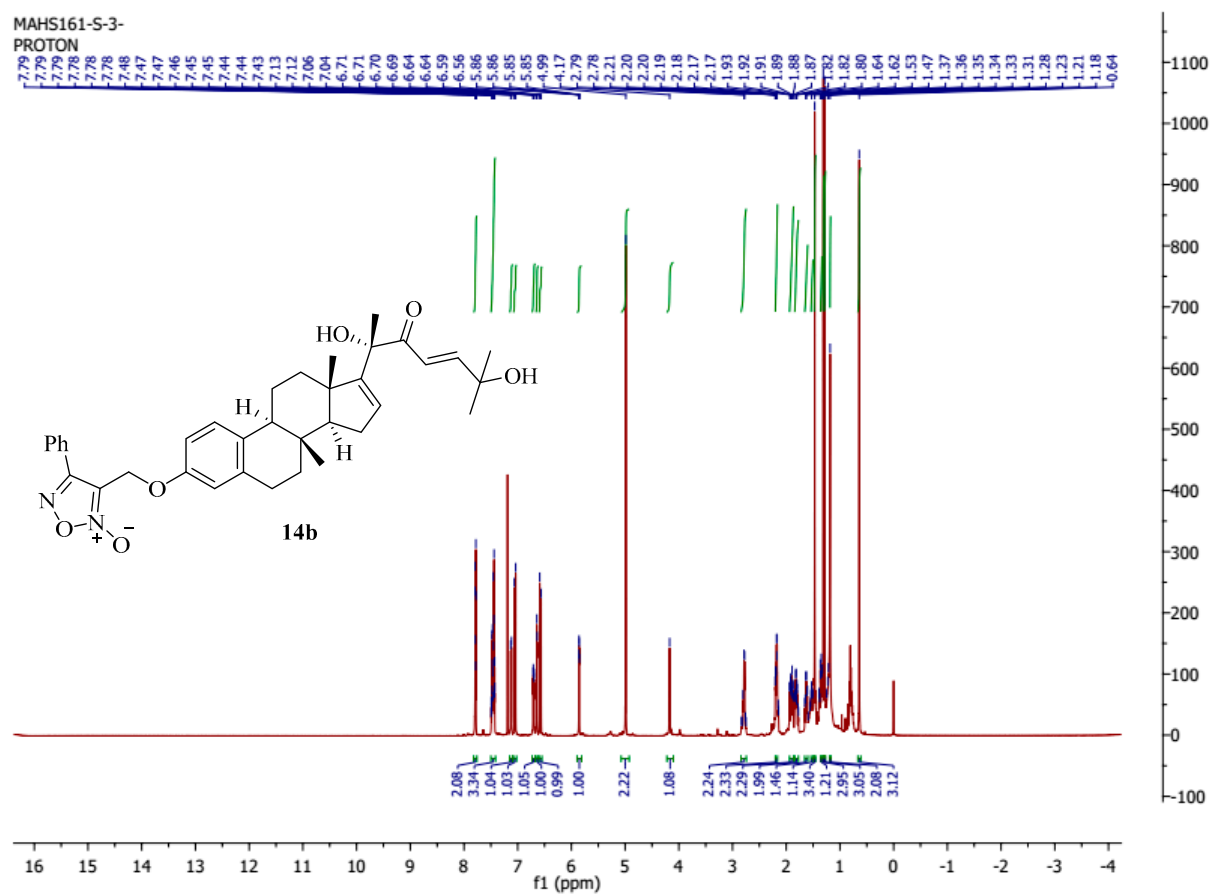

Figure S 27. <sup>1</sup>H NMR of compound 14b.

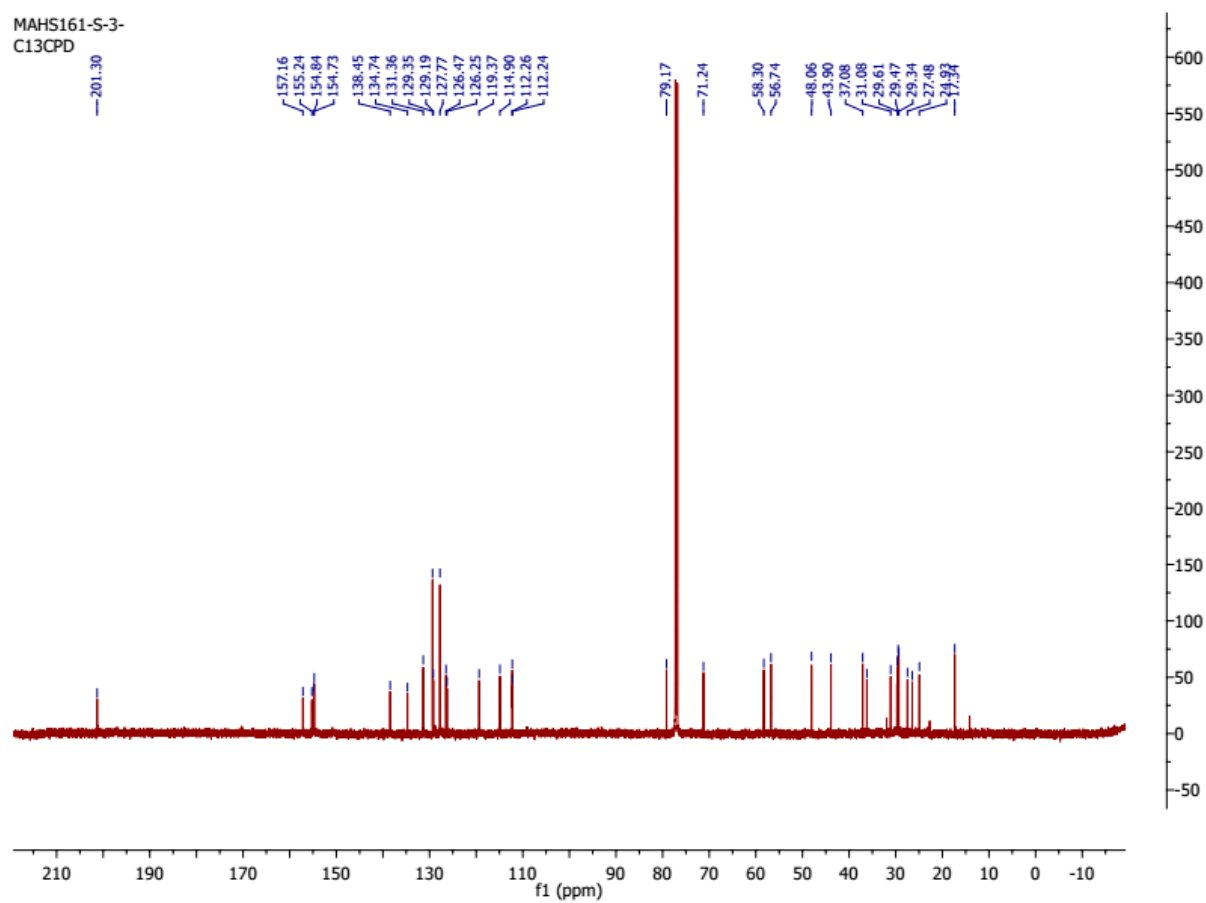

Figure S 28.  $^{13}\text{C}$  NMR of compound **14b**.

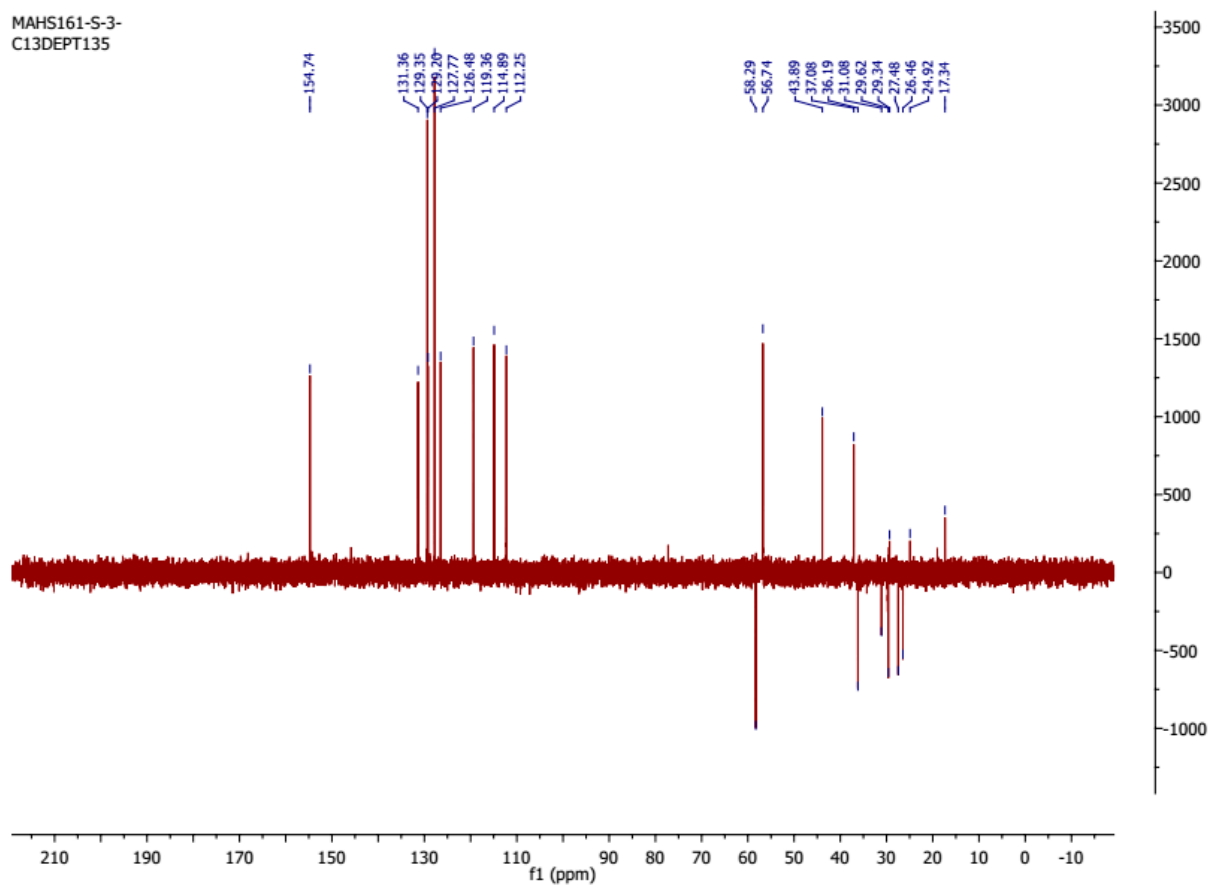

**Figure S 29.** DEPT135  $^{13}\text{C}$  NMR of compound **14b**.

### 1.13 Compound 15a

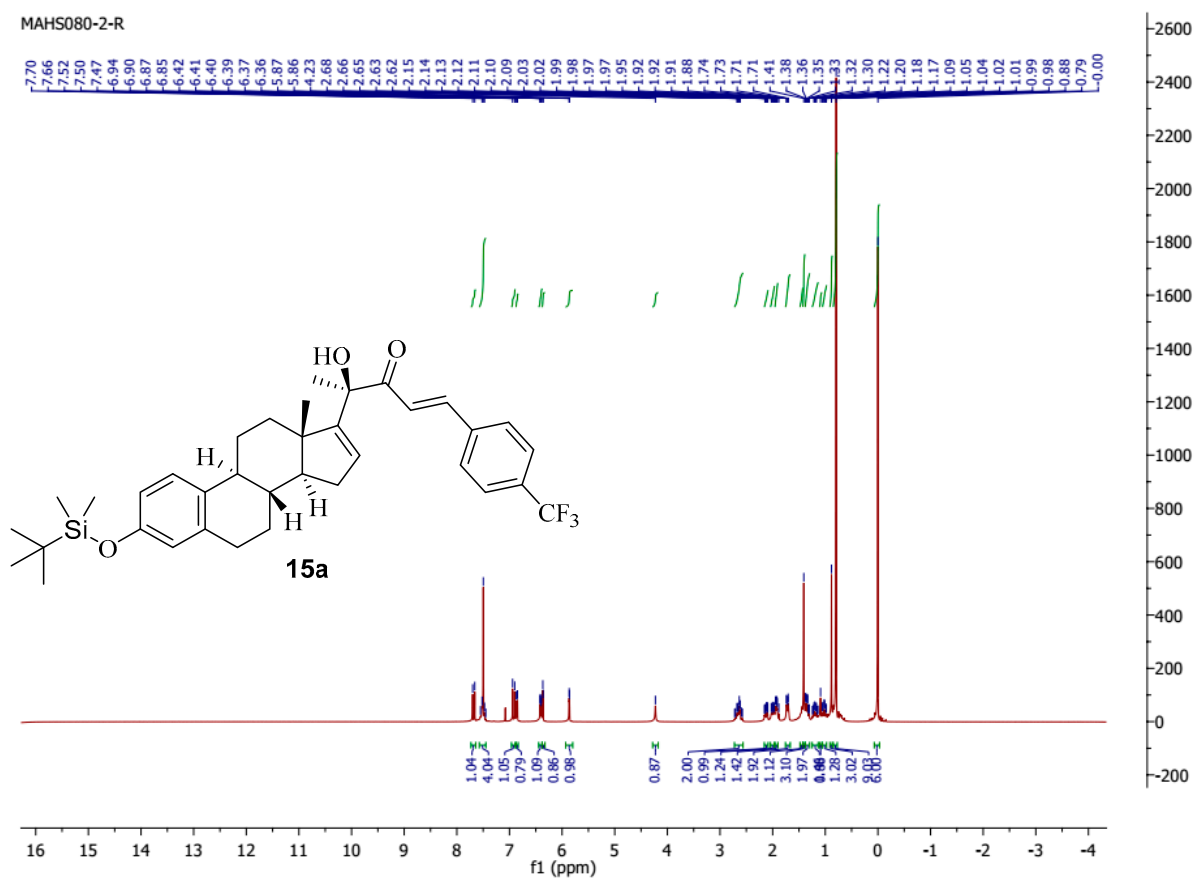

**Figure S 30.** <sup>1</sup>H NMR of compound **15a**.

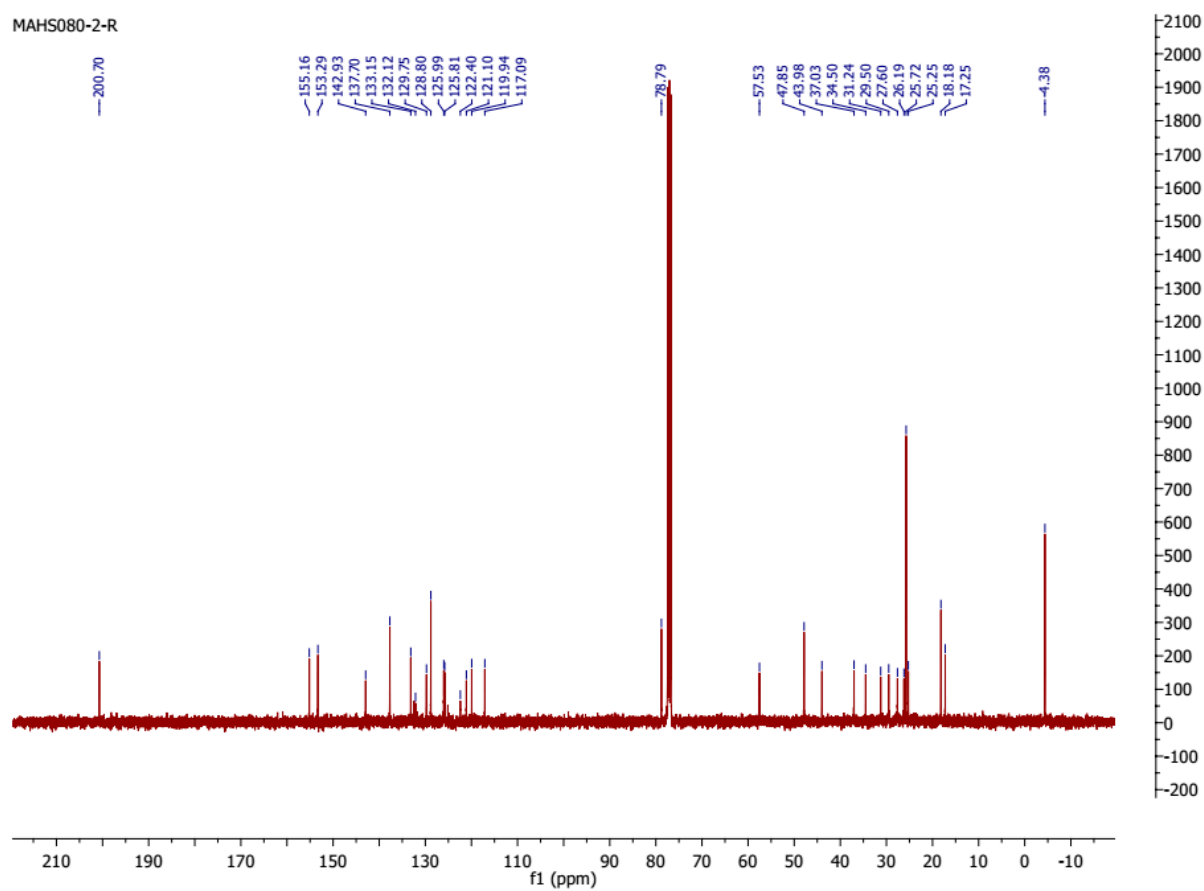

Figure S 31.  $^{13}\text{C}$  NMR of compound **15a**.

### 1.14 Compound 15b

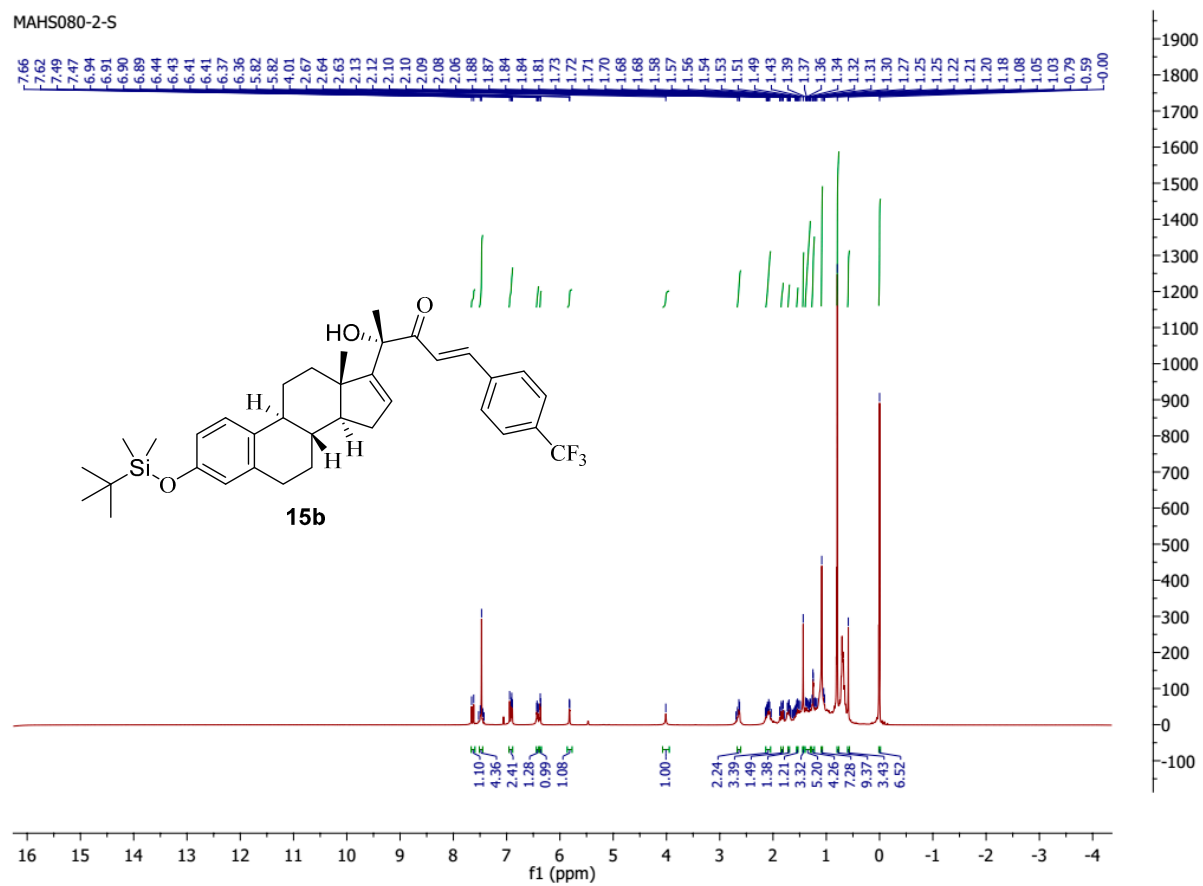

Figure S 32.  $^1\text{H}$  NMR of compound **15b**.



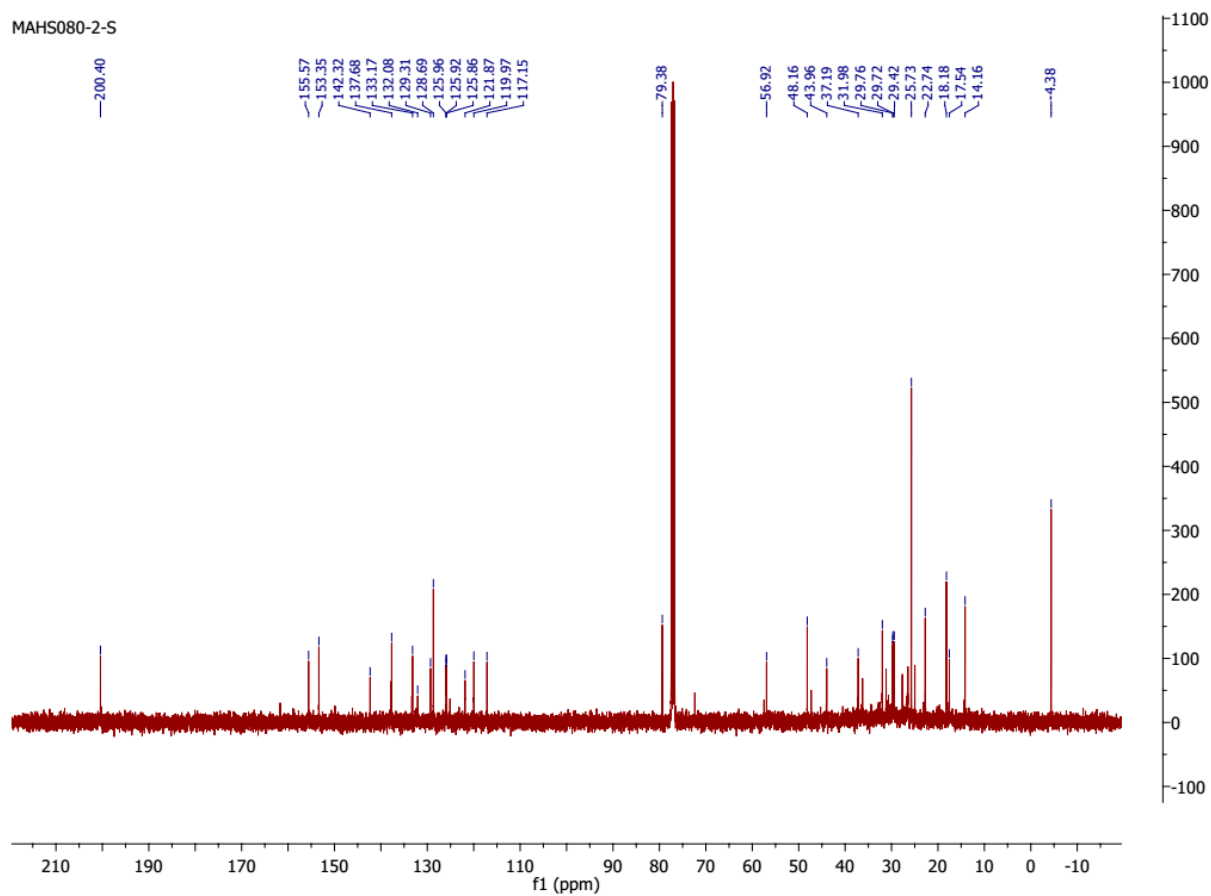

Figure S 33.  $^{13}\text{C}$  NMR of compound **15b**.

## 1.15 Compound 15c

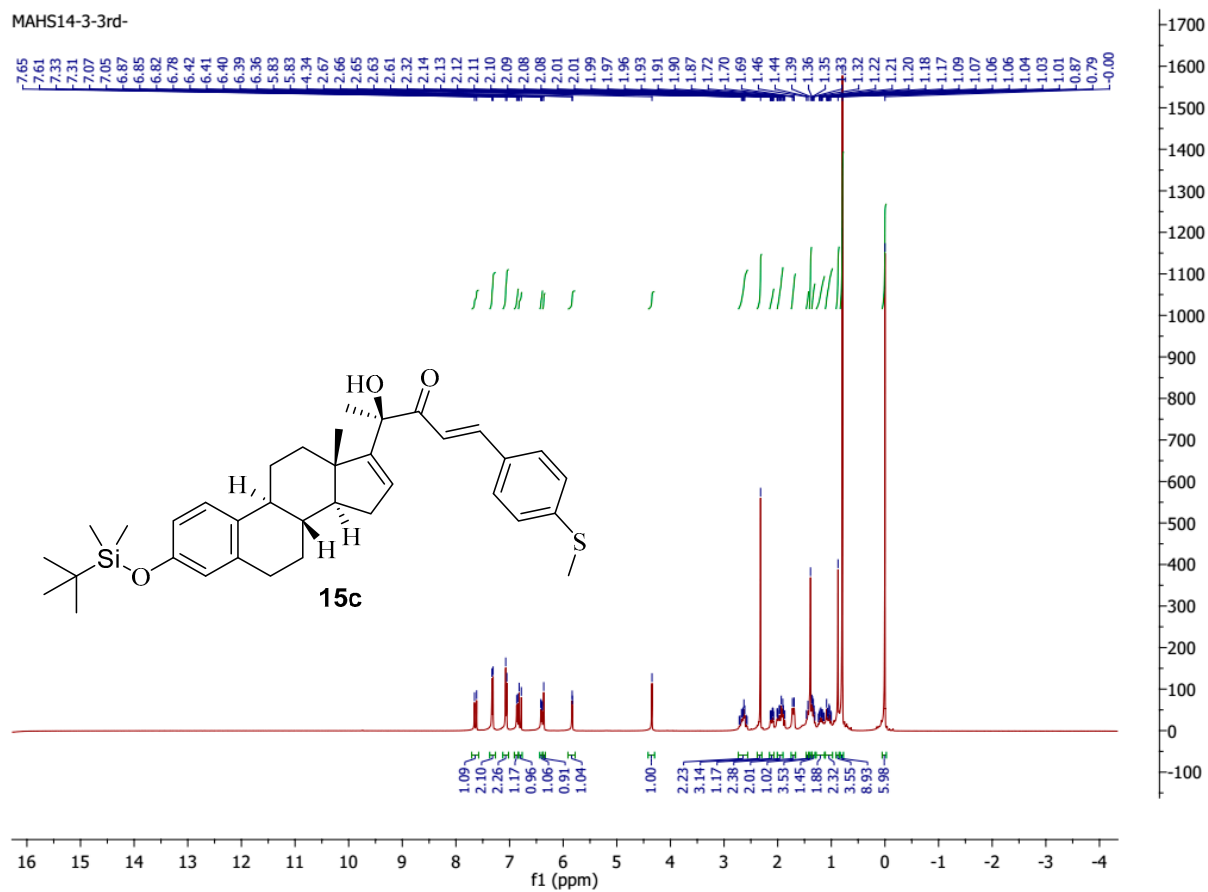

**Figure S 34.**  $^1\text{H}$  NMR of compound **15c**.

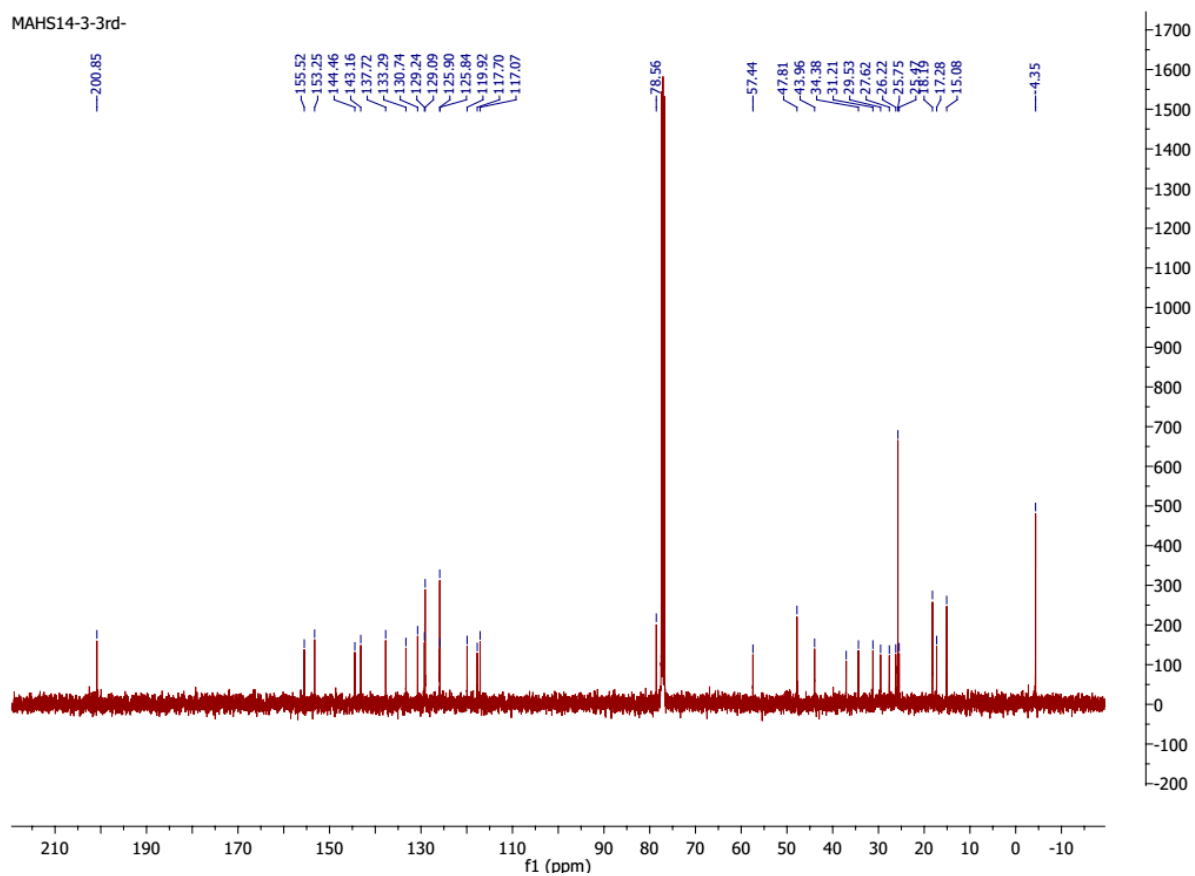

**Figure S 35.**  $^{13}\text{C}$  NMR of compound **15c**.

## 1.16 Compound 15d

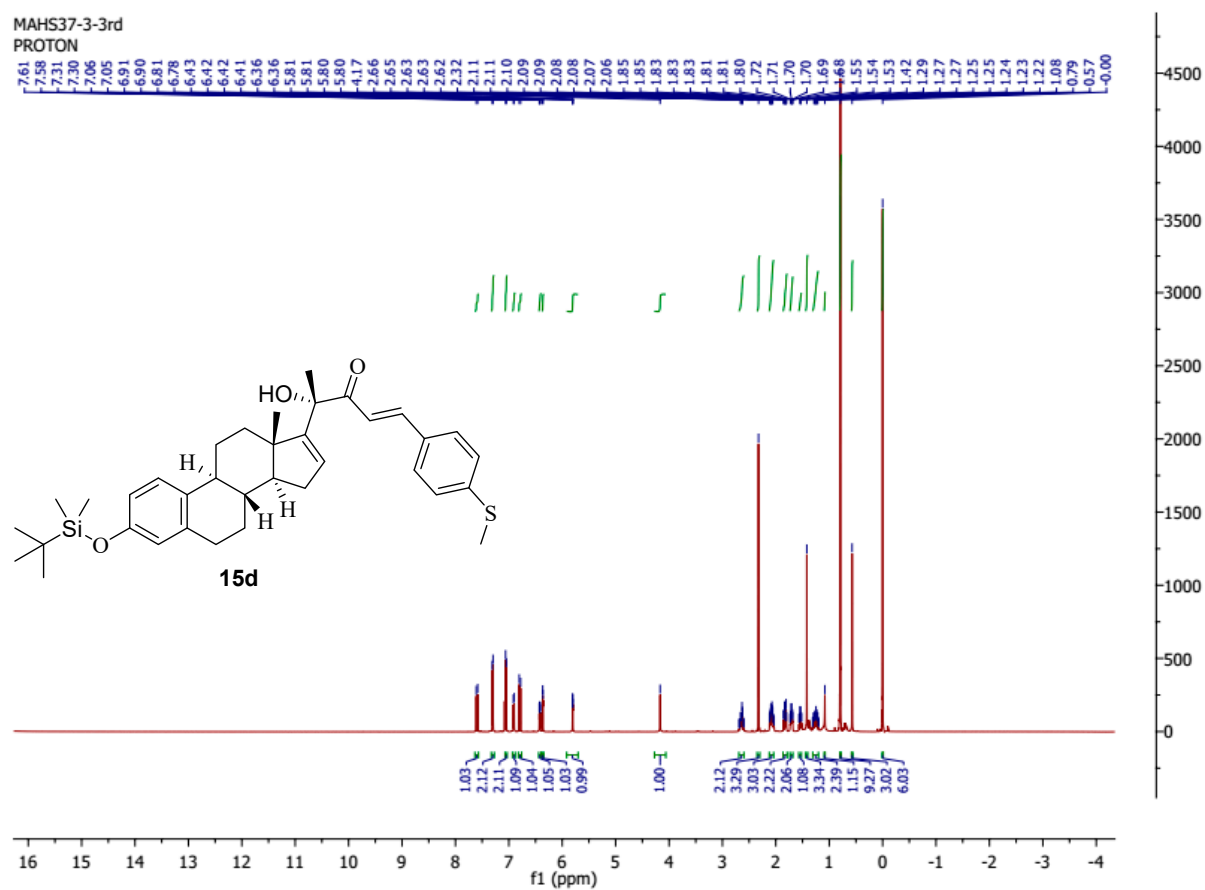

Figure S 36.  $^1\text{H}$  NMR of compound **15d**.

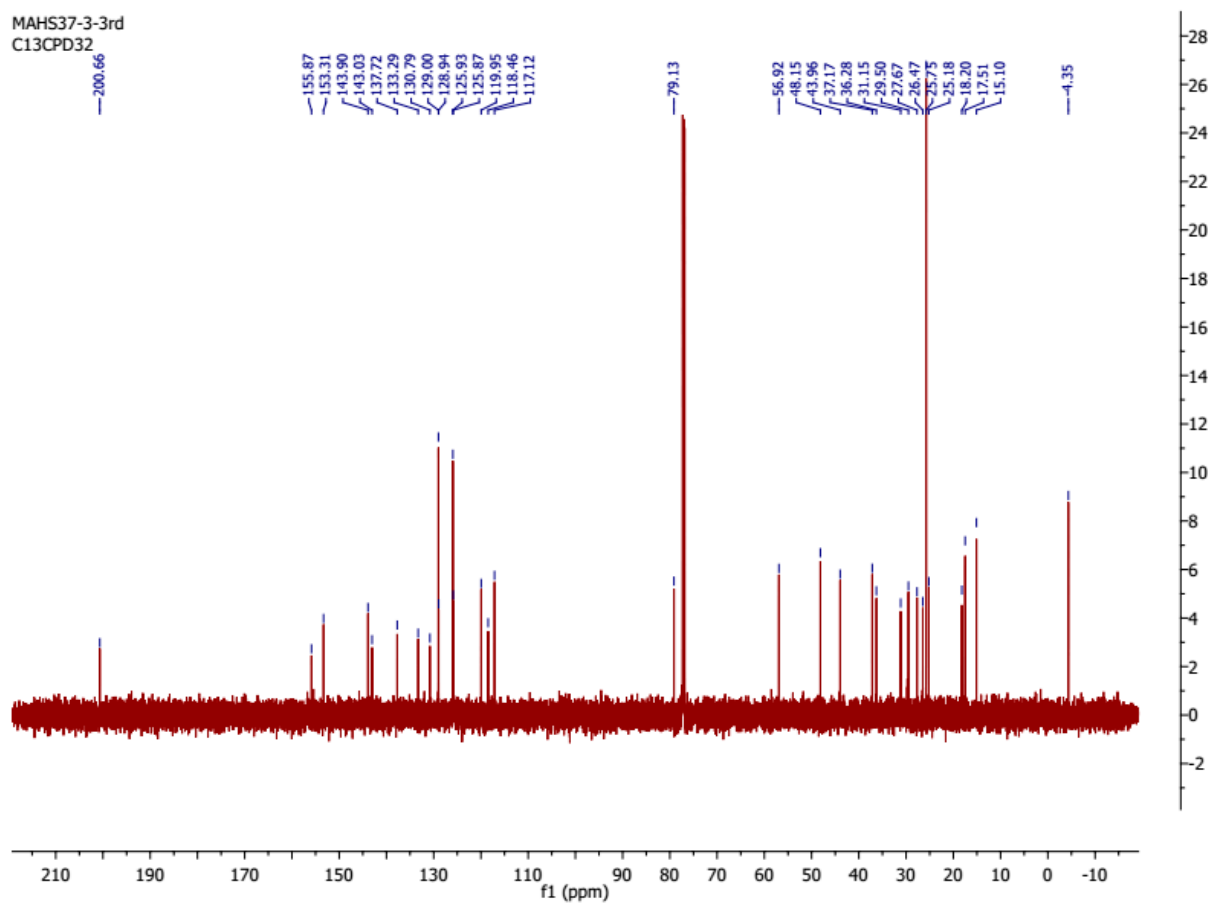

**Figure S 37.**  $^{13}\text{C}$  NMR of compound **15d**.

### 1.17 Compound 15e

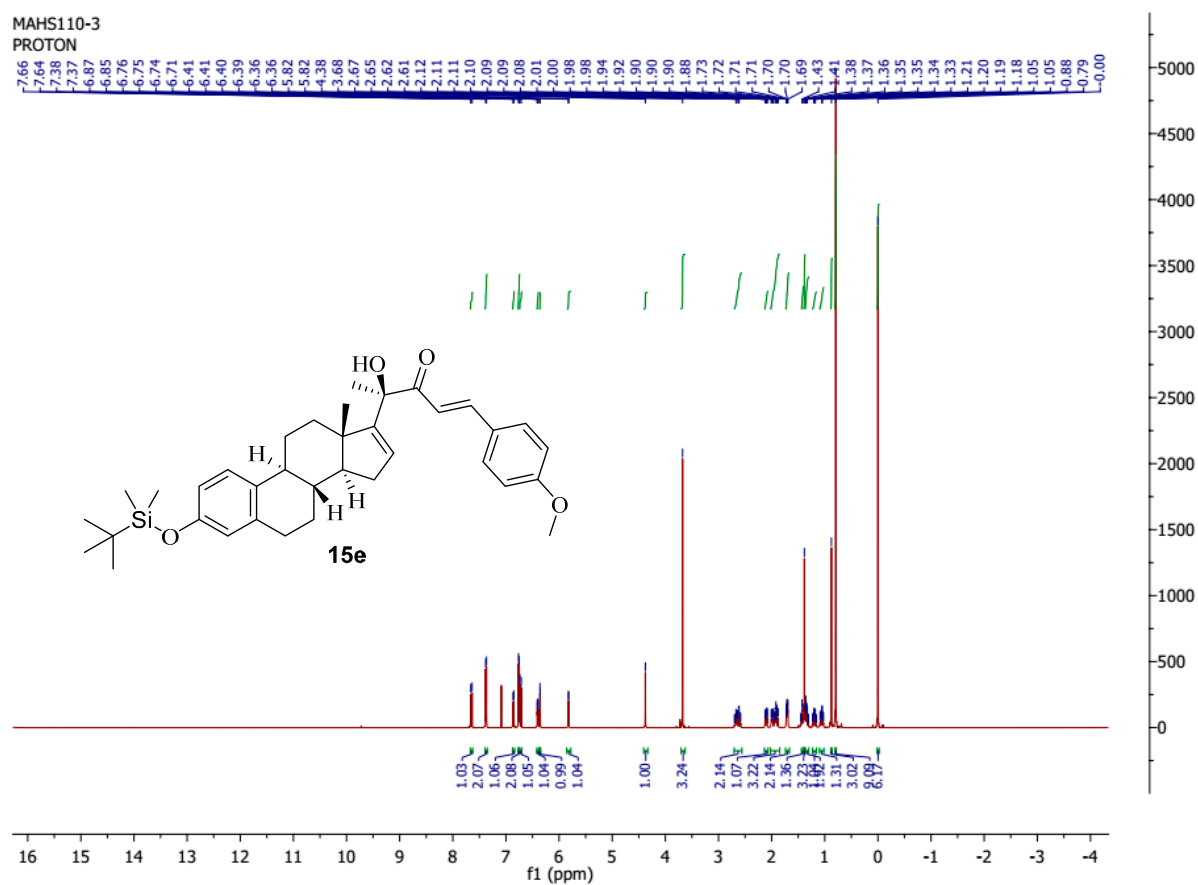

Figure S 38.  $^1\text{H}$  NMR of compound **15e**.

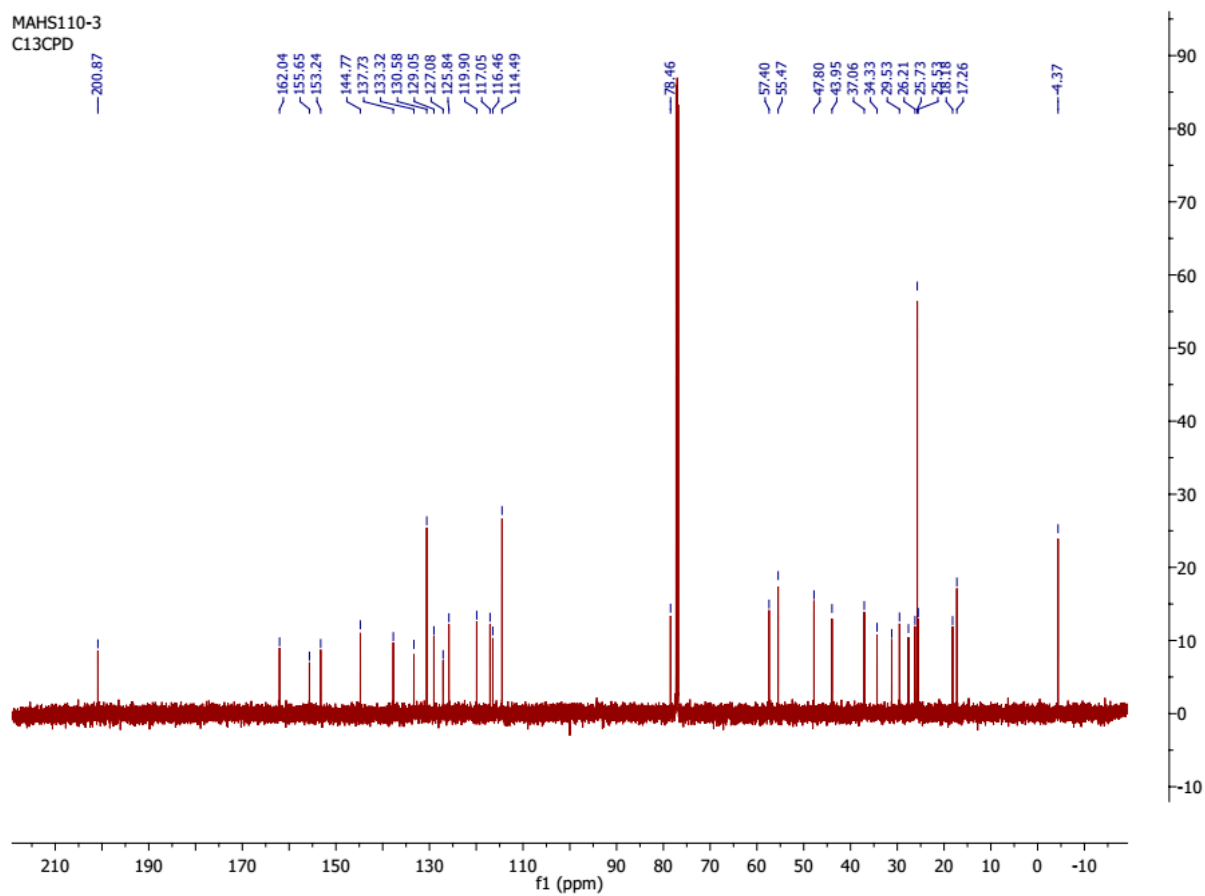

**Figure S 39.**  $^{13}\text{C}$  NMR of compound **15e**.

### 1.18 Compound 15f

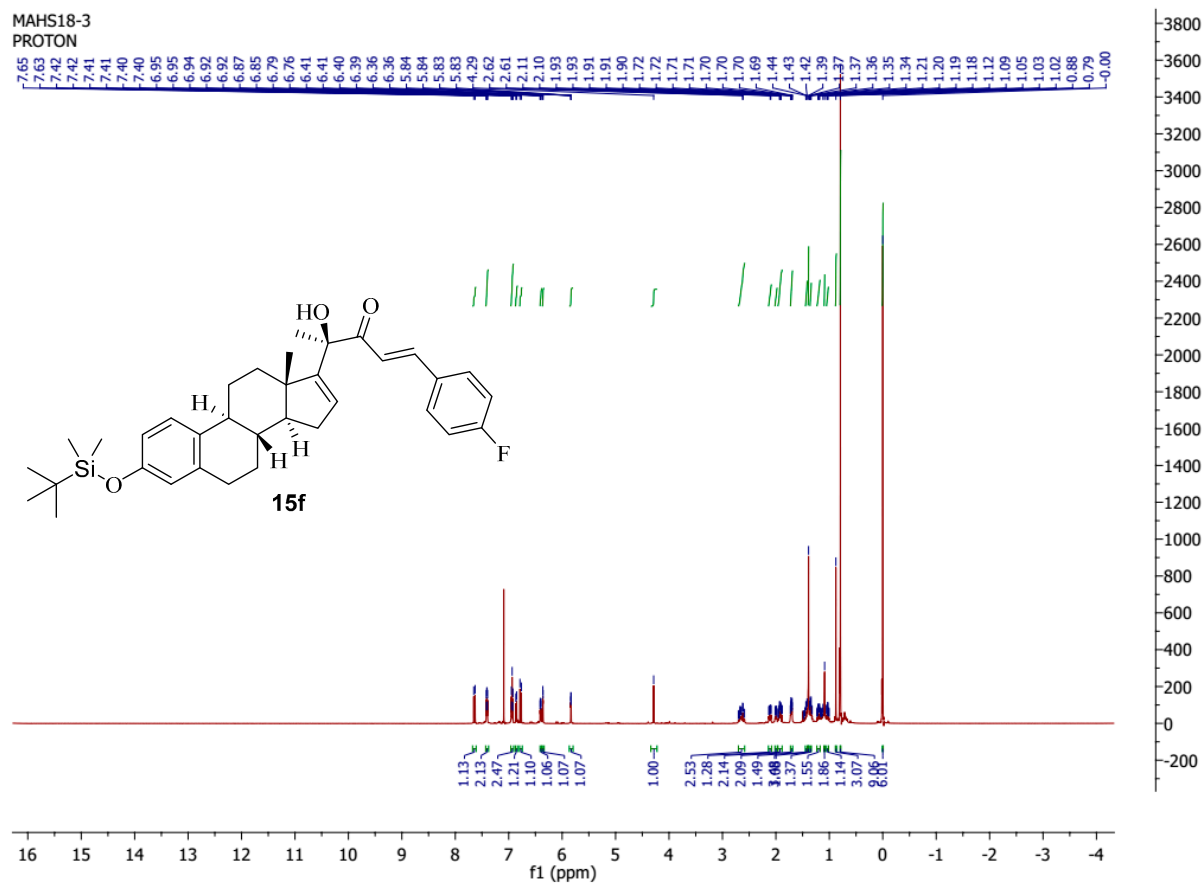

Figure S 40.  $^1\text{H}$  NMR of compound **15f**.



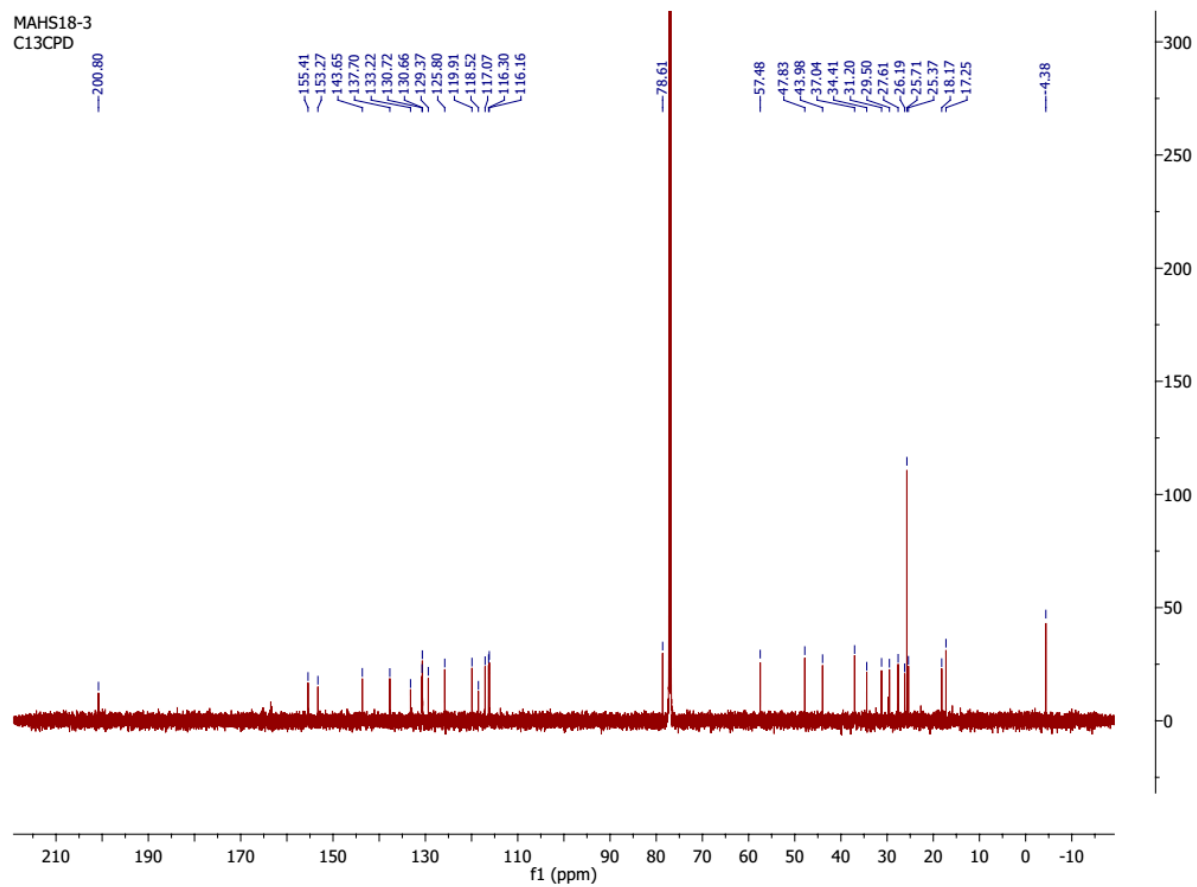

**Figure S 41.**  $^{13}\text{C}$  NMR of compound **15f**.

### 1.19 Compound 15g

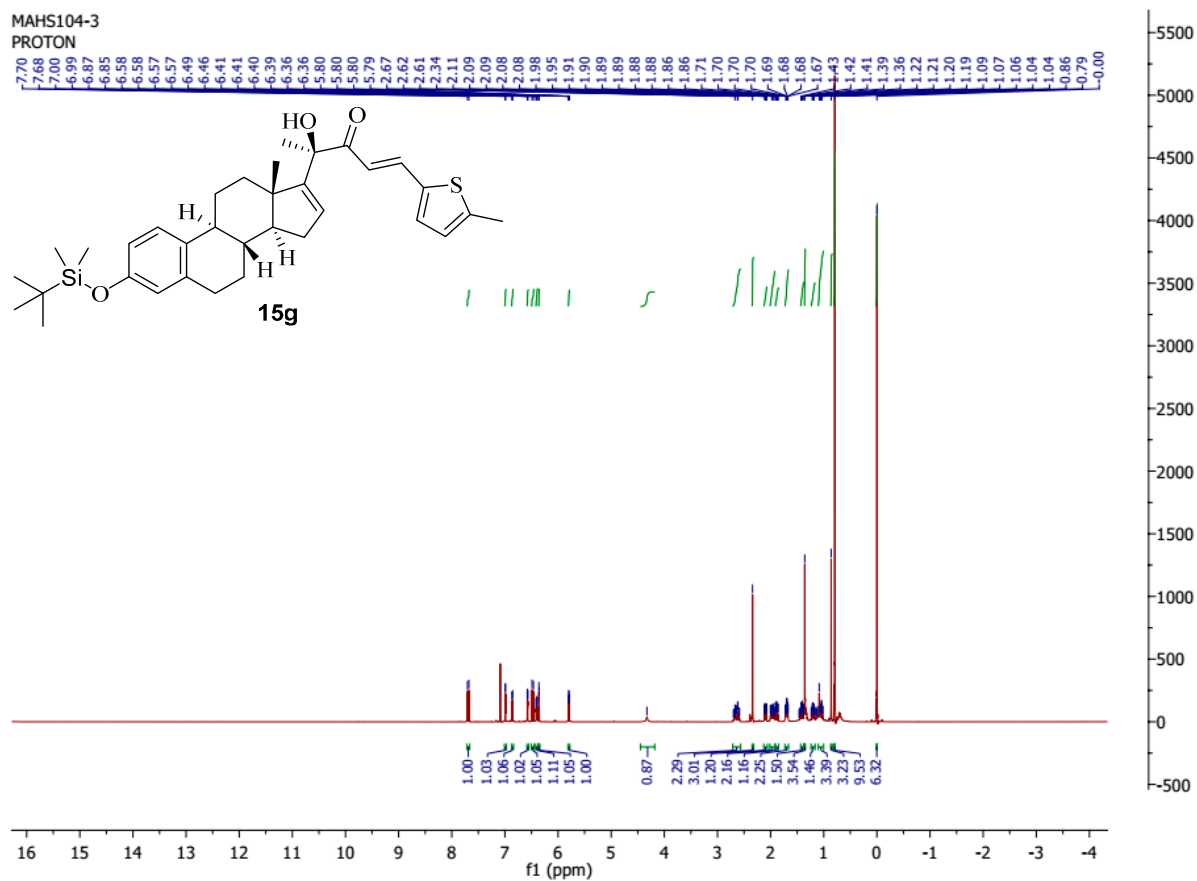

**Figure S 42.**  $^1\text{H}$  NMR of compound **15g**.

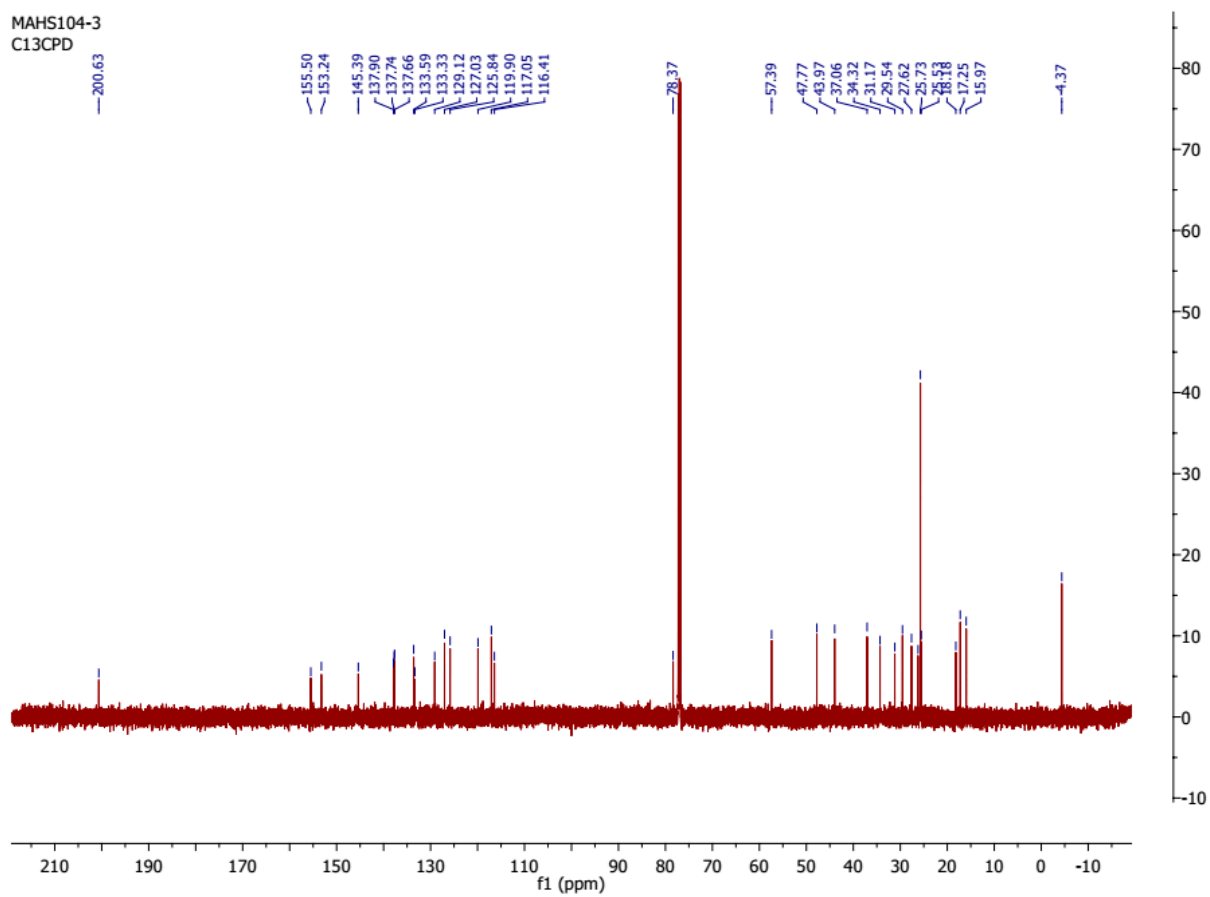

**Figure S 43.**  $^{13}\text{C}$  NMR of compound **15g**.

## 1.20 Compound 15h

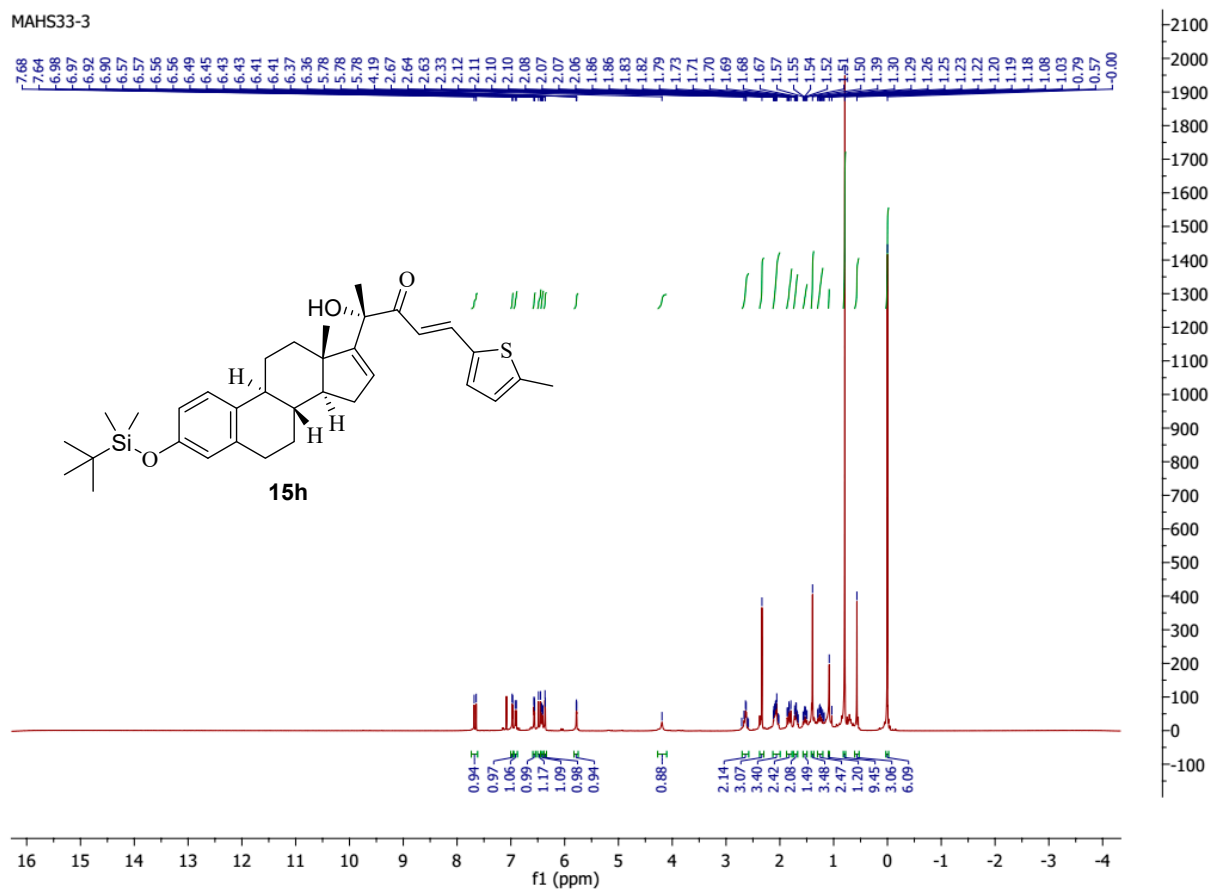

Figure S 44.  $^1\text{H}$  NMR of compound 15h.

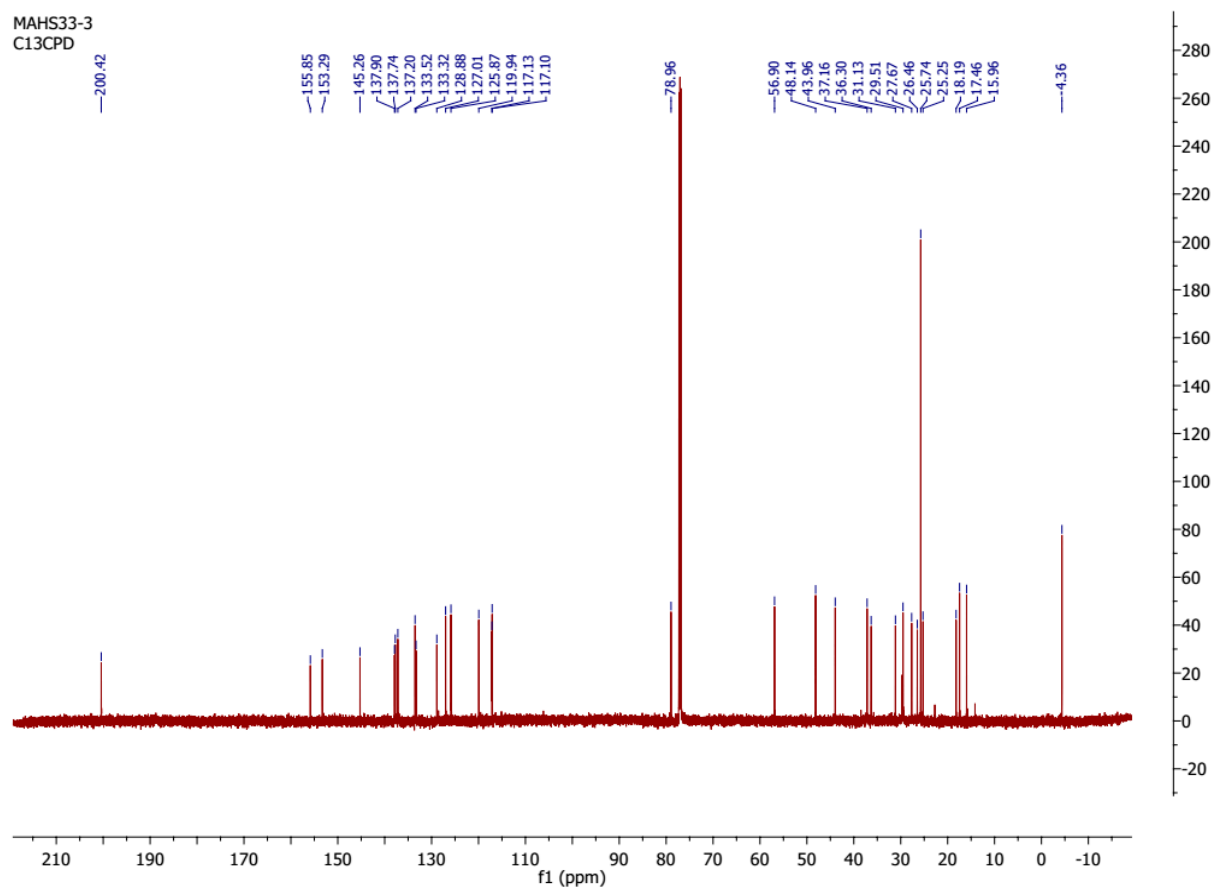

**Figure S 45.**  $^{13}\text{C}$  NMR of compound **15h**.

## 1.21 Compound 15i

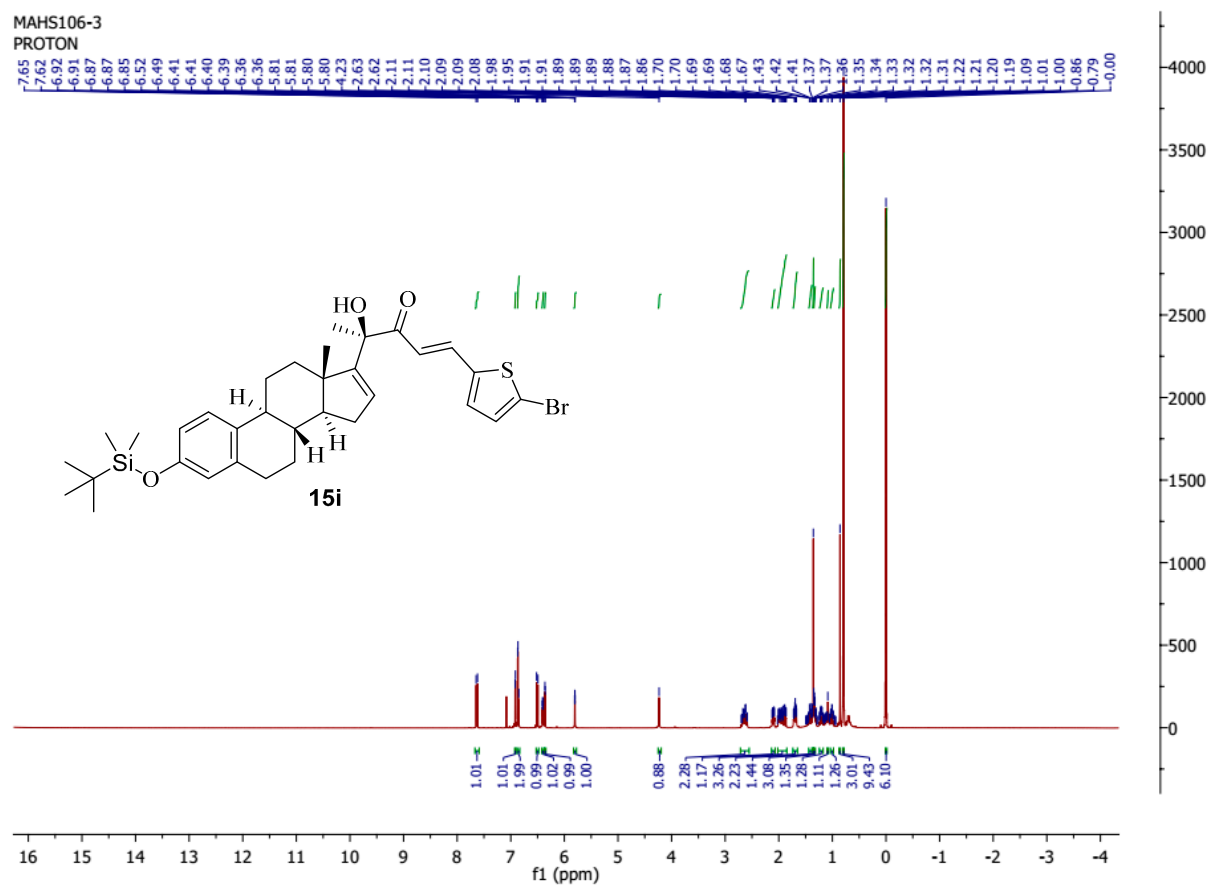

Figure S 46.  $^1\text{H}$  NMR of compound **15i**.

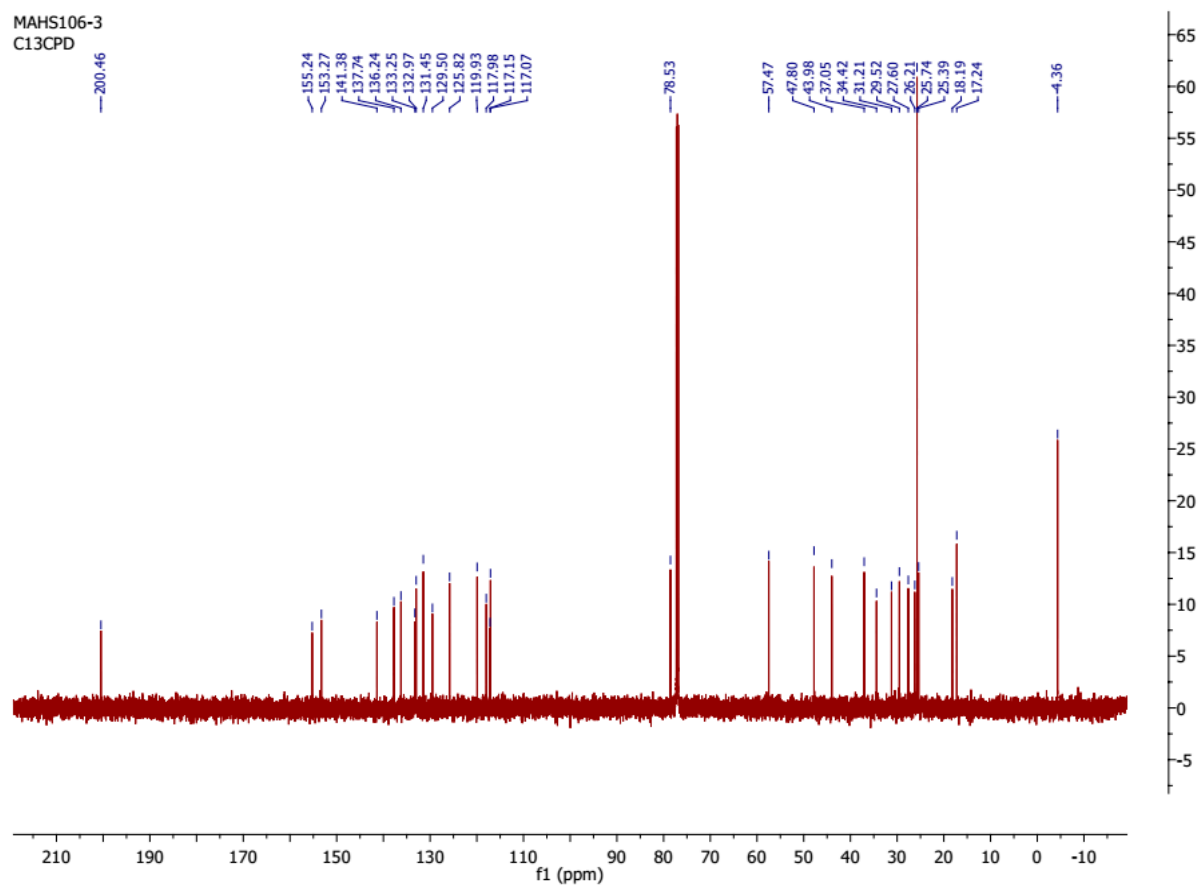

Figure S 47.  $^{13}\text{C}$  NMR of compound **15i**.

## 1.22 Compound 15j

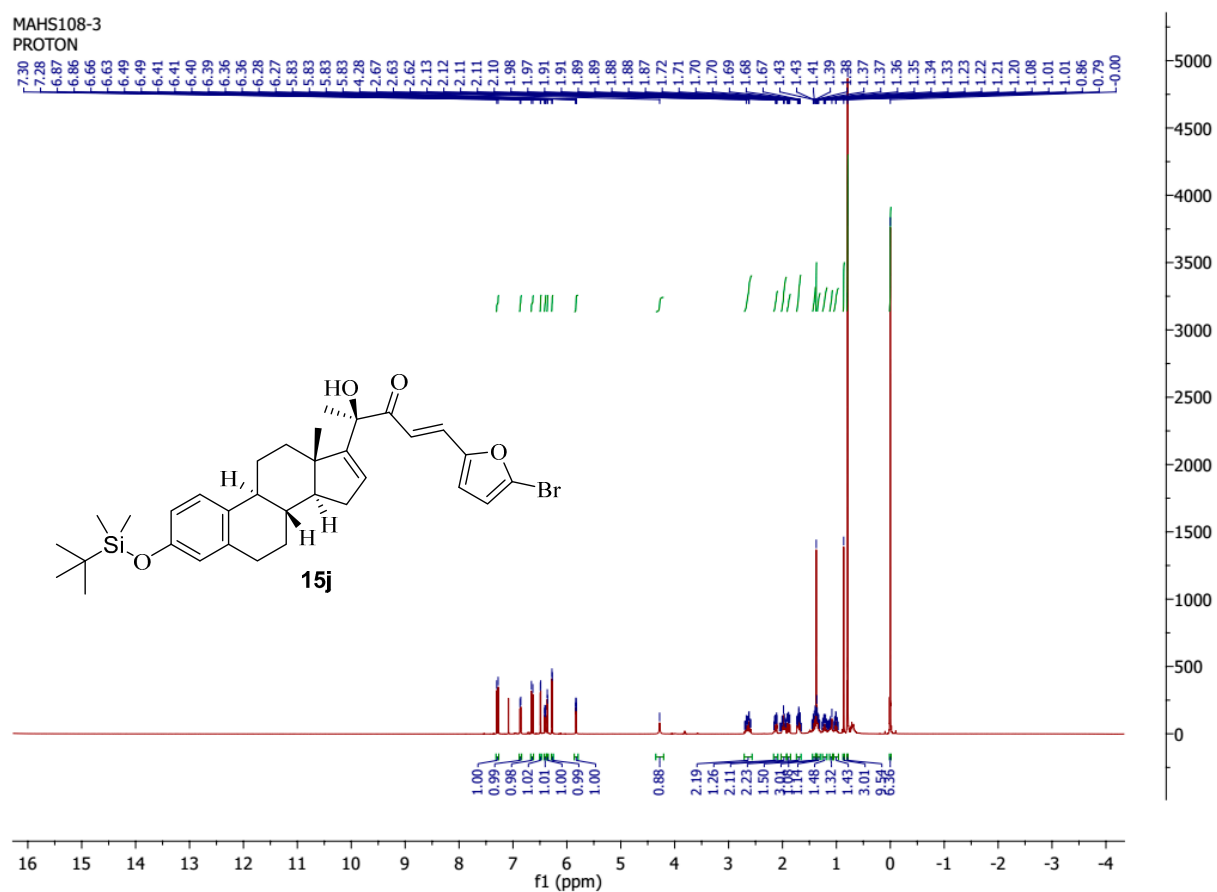

Figure S 48.  $^1\text{H}$  NMR of compound **15j**.



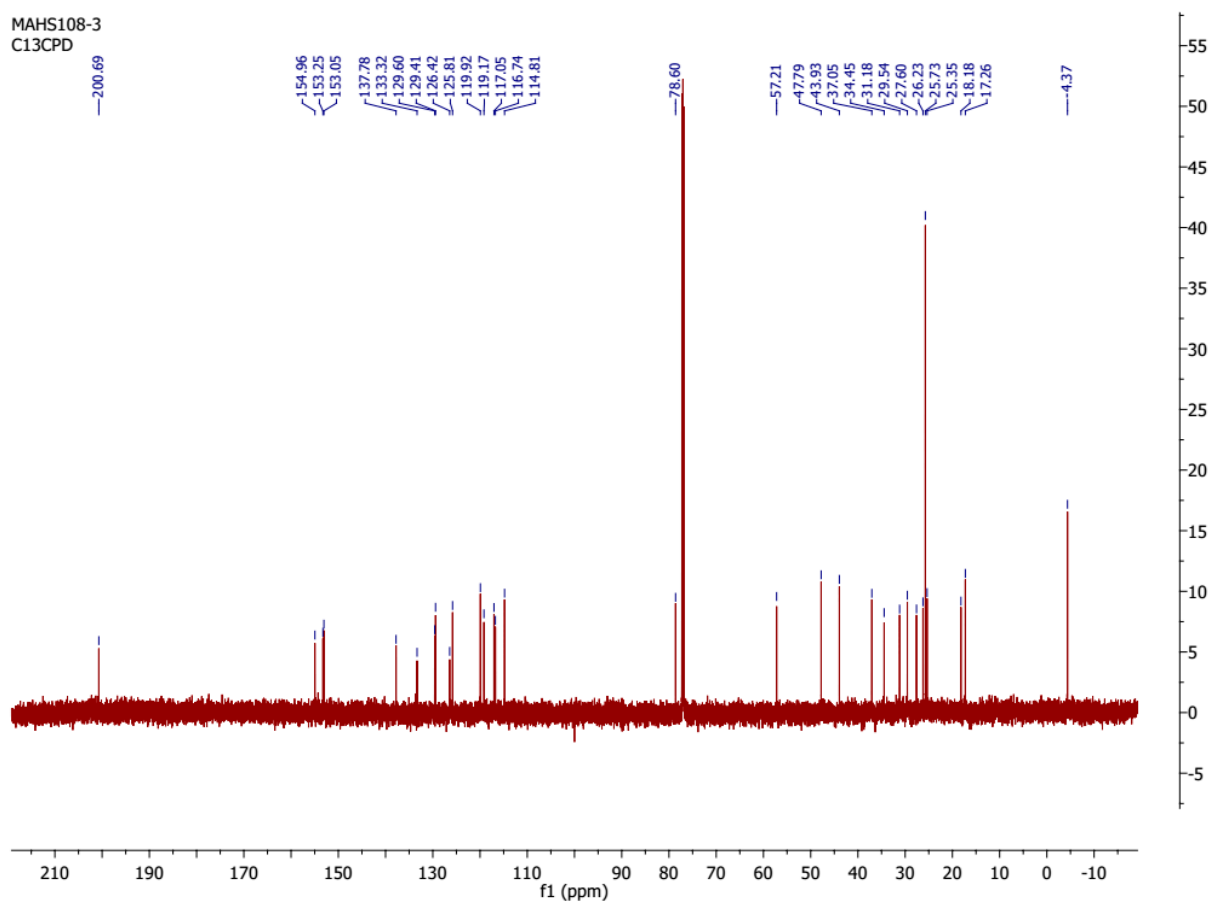

**Figure S 49.**  $^{13}\text{C}$  NMR of compound **15j**.

### 1.23 Compound 16a

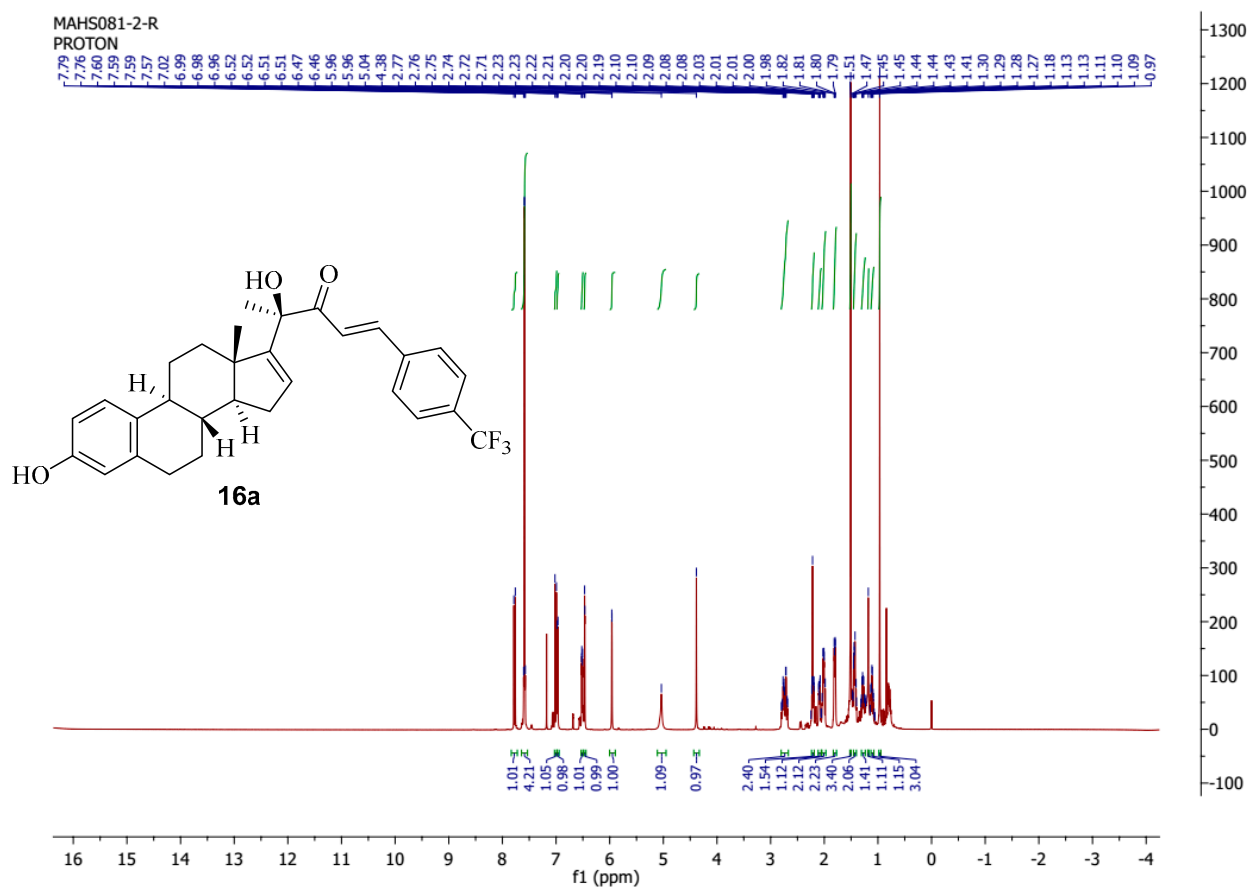

Figure S 50.  $^1\text{H}$  NMR of compound **16a**.

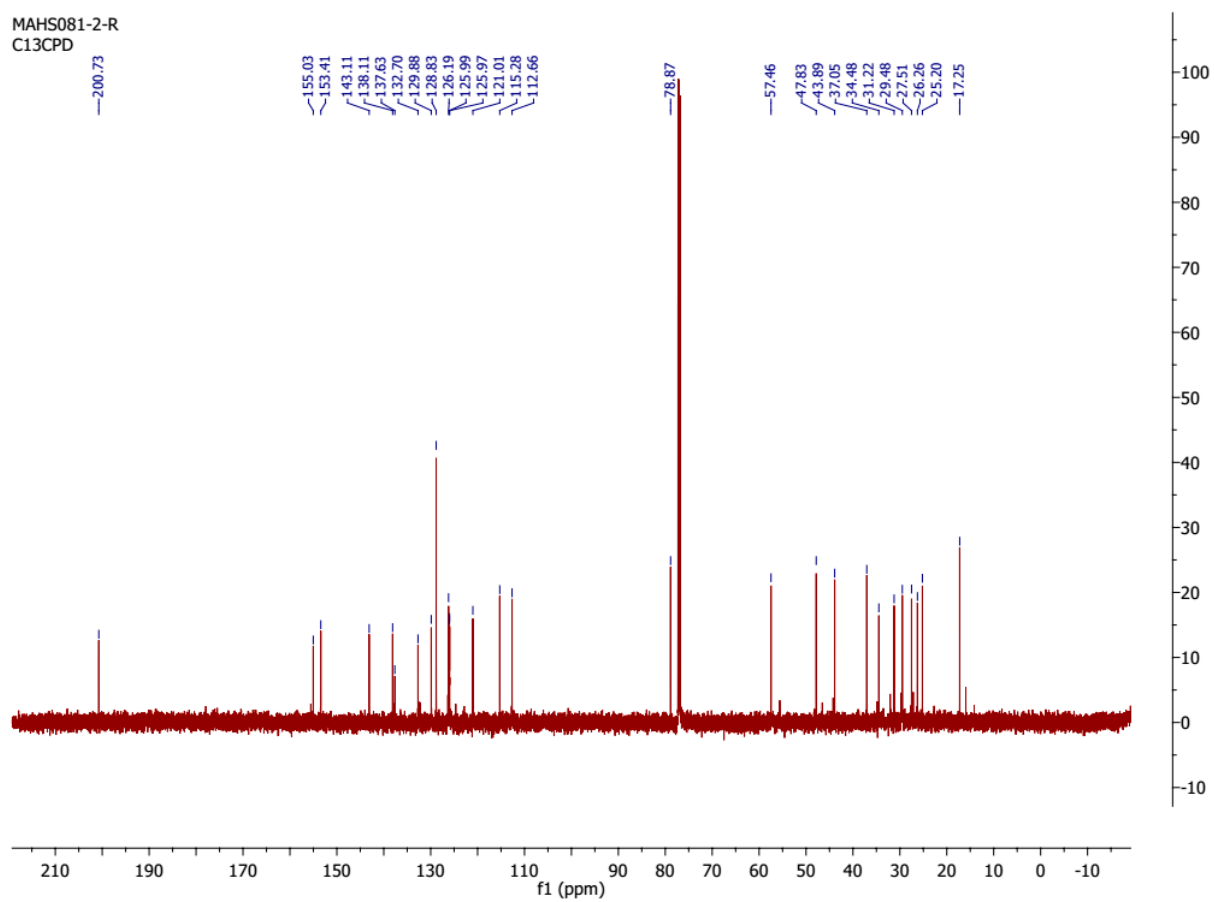

**Figure S 51.**  $^{13}\text{C}$  NMR of compound **16a**.

## 1.24 Compound 16b

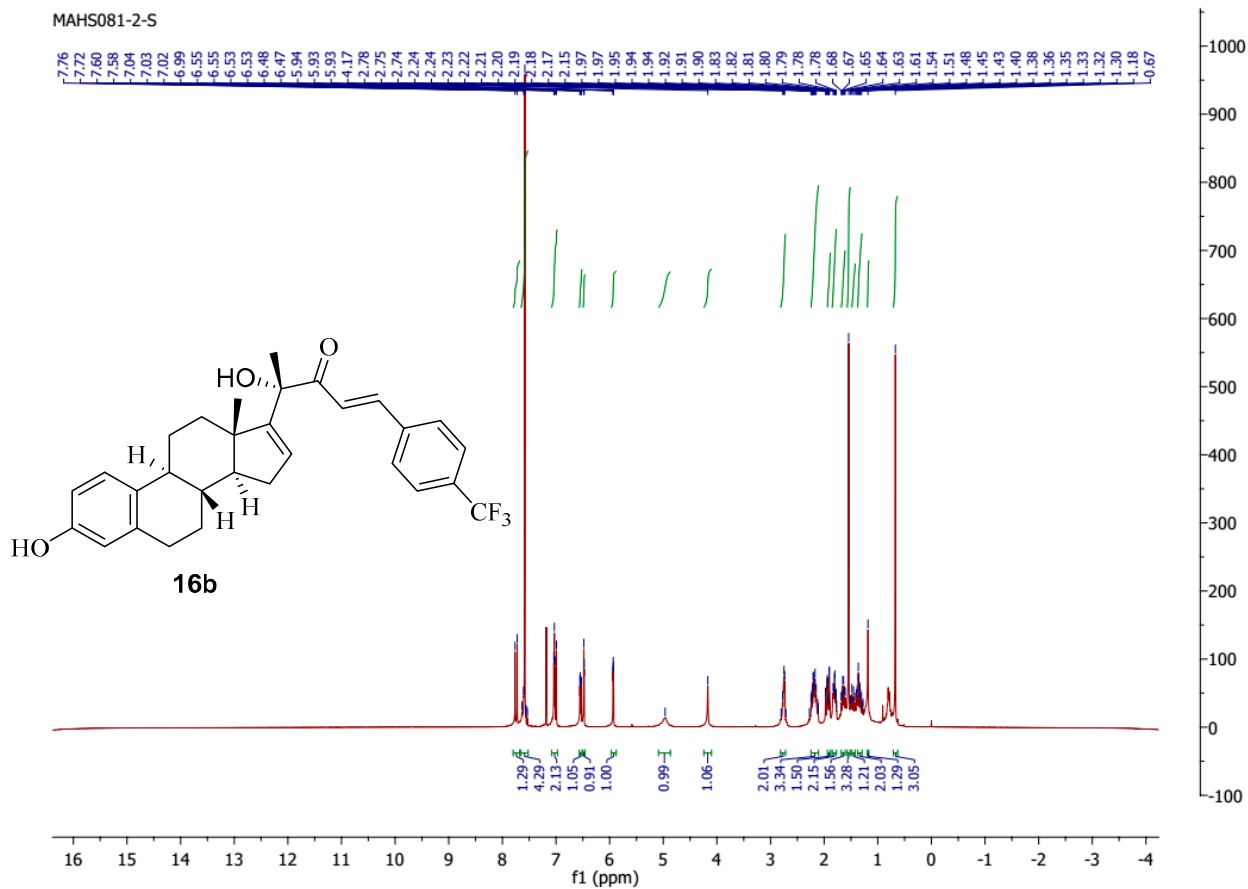

Figure S 52.  $^1\text{H}$  NMR of compound 16b.

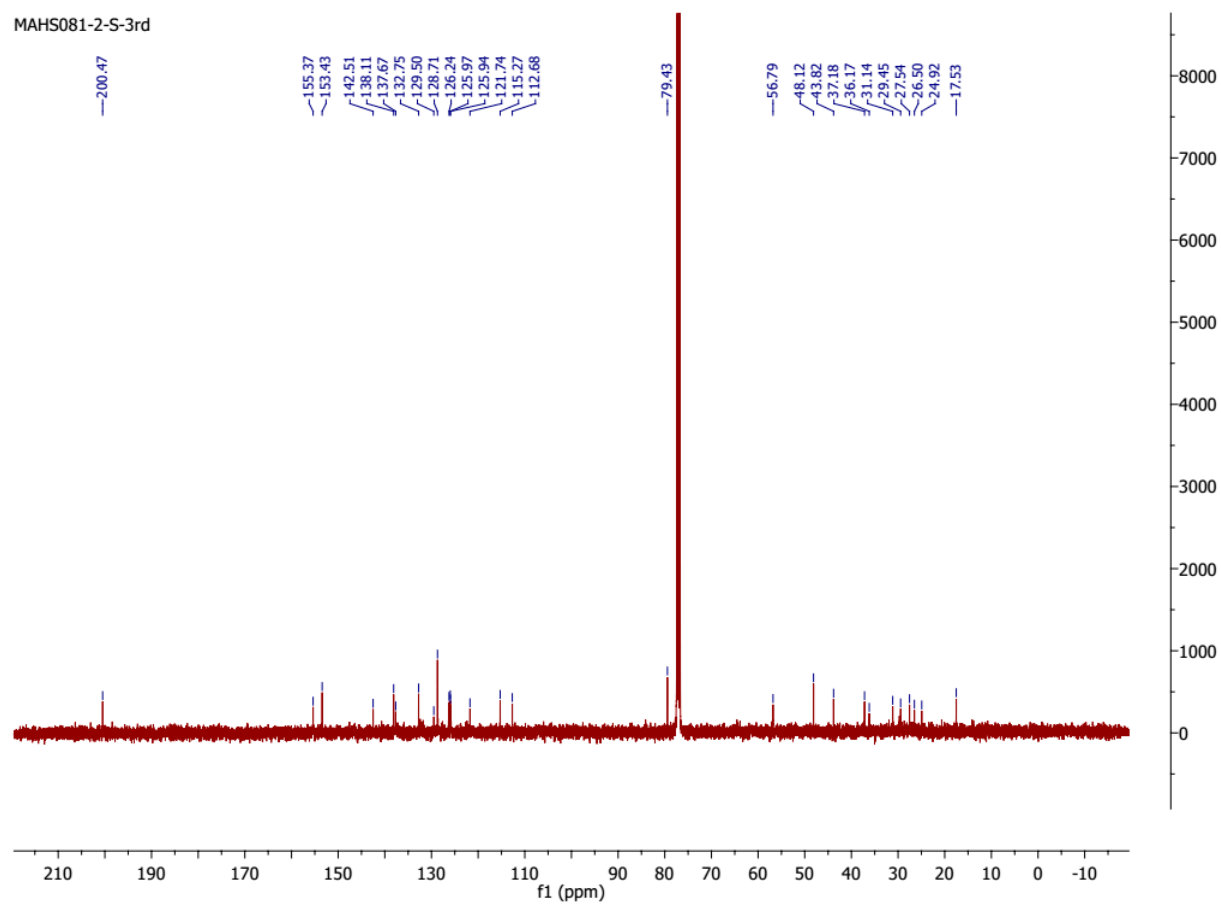

**Figure S 53.**  $^{13}\text{C}$  NMR of compound **16b**.

## 1.25 Compound 16c

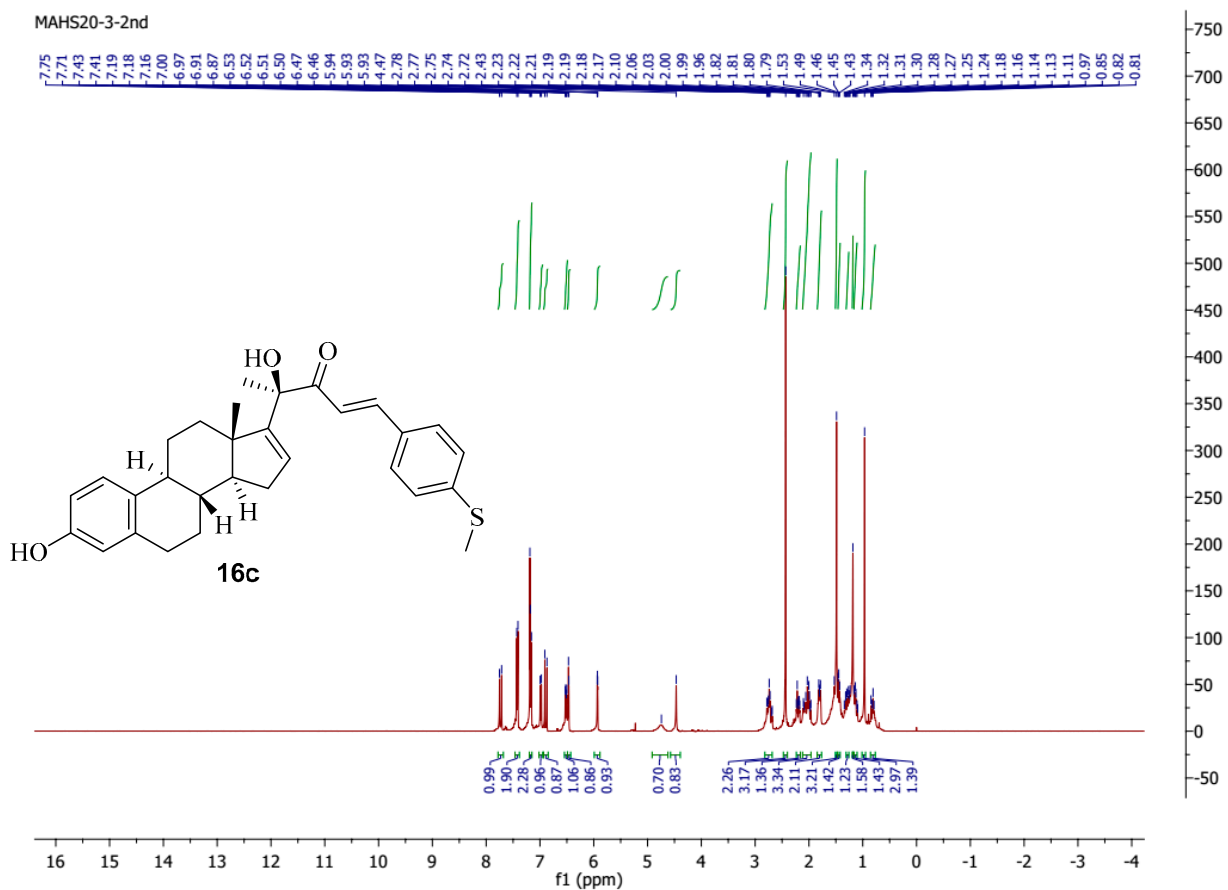

Figure S 54. <sup>1</sup>H NMR of compound **16c**.

## 1.26 Compound 16d

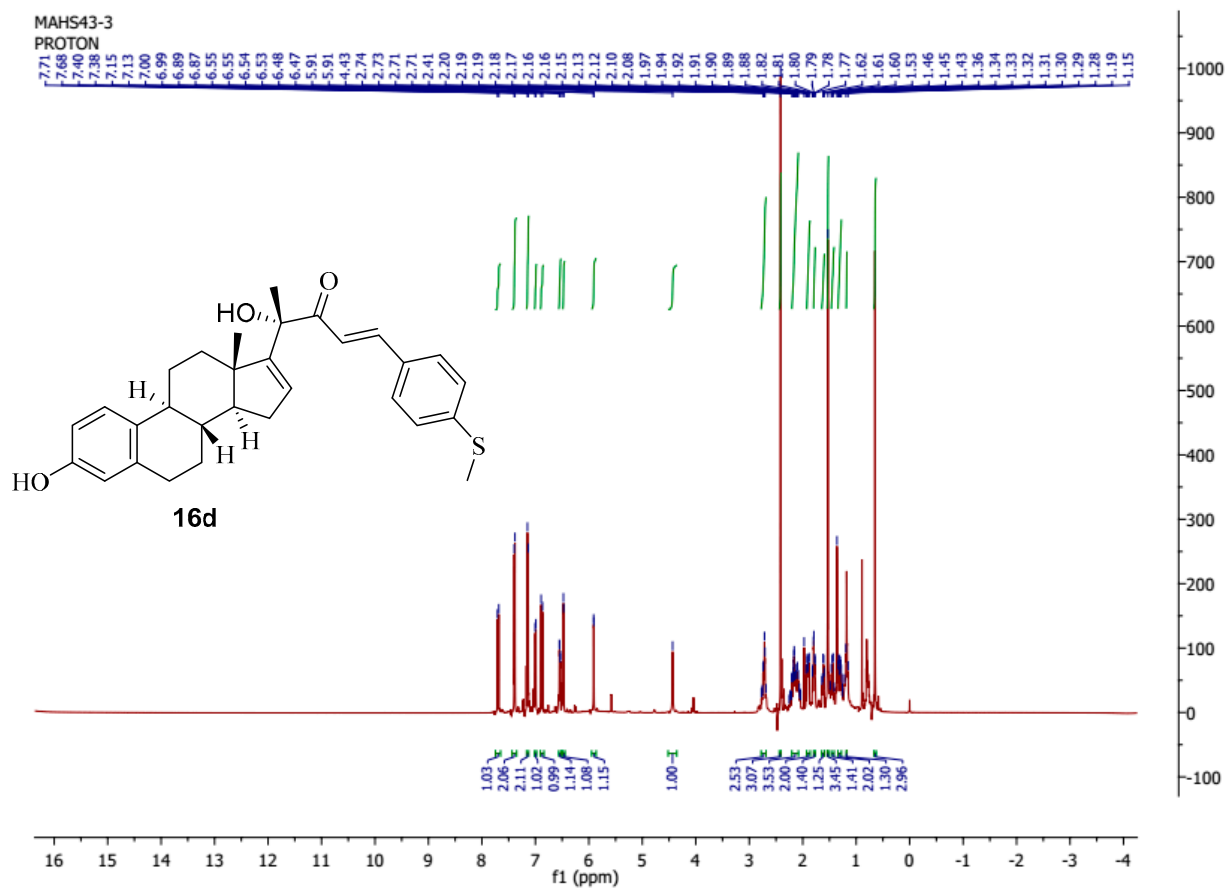

Figure S 55.  $^1\text{H}$  NMR of compound **16d**.

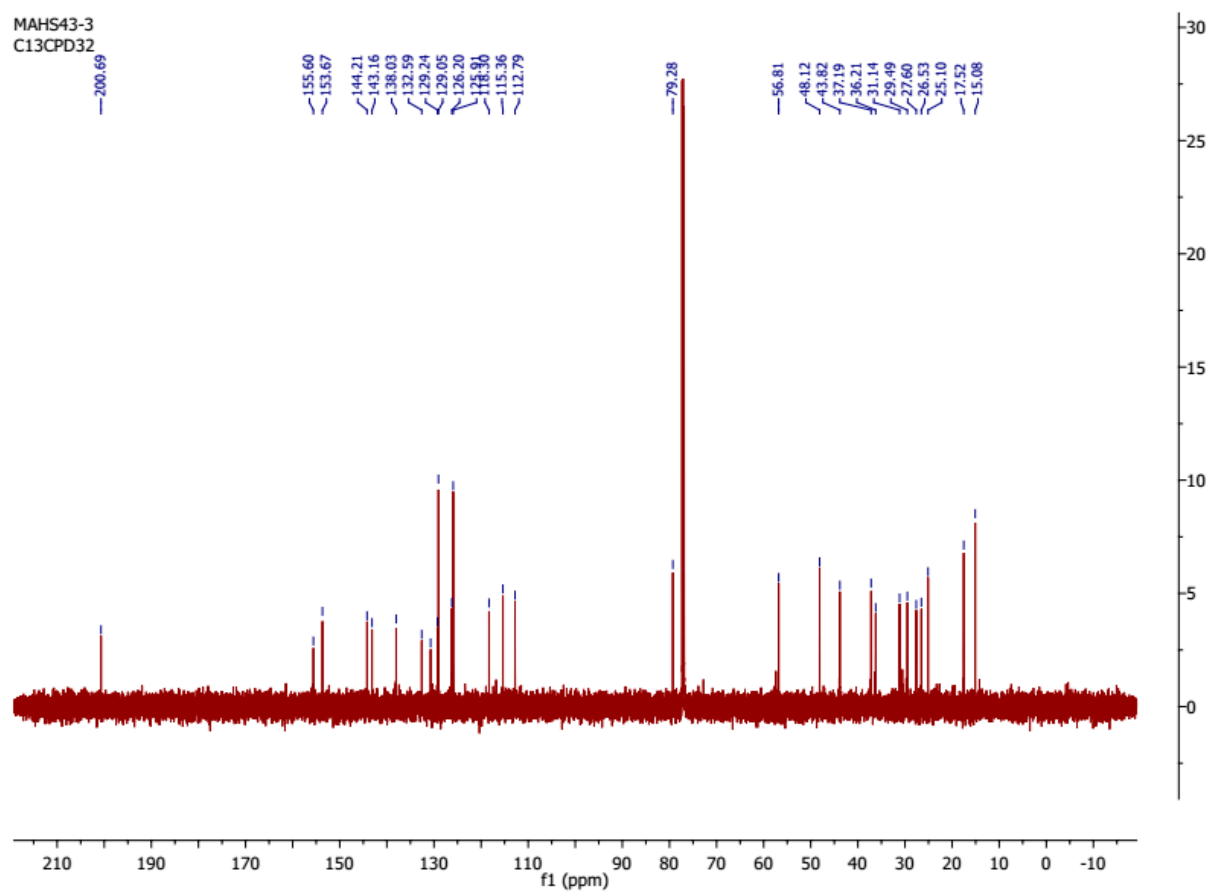

**Figure S 56.**  $^{13}\text{C}$  NMR of compound **16d**.



### 1.27 Compound 16e

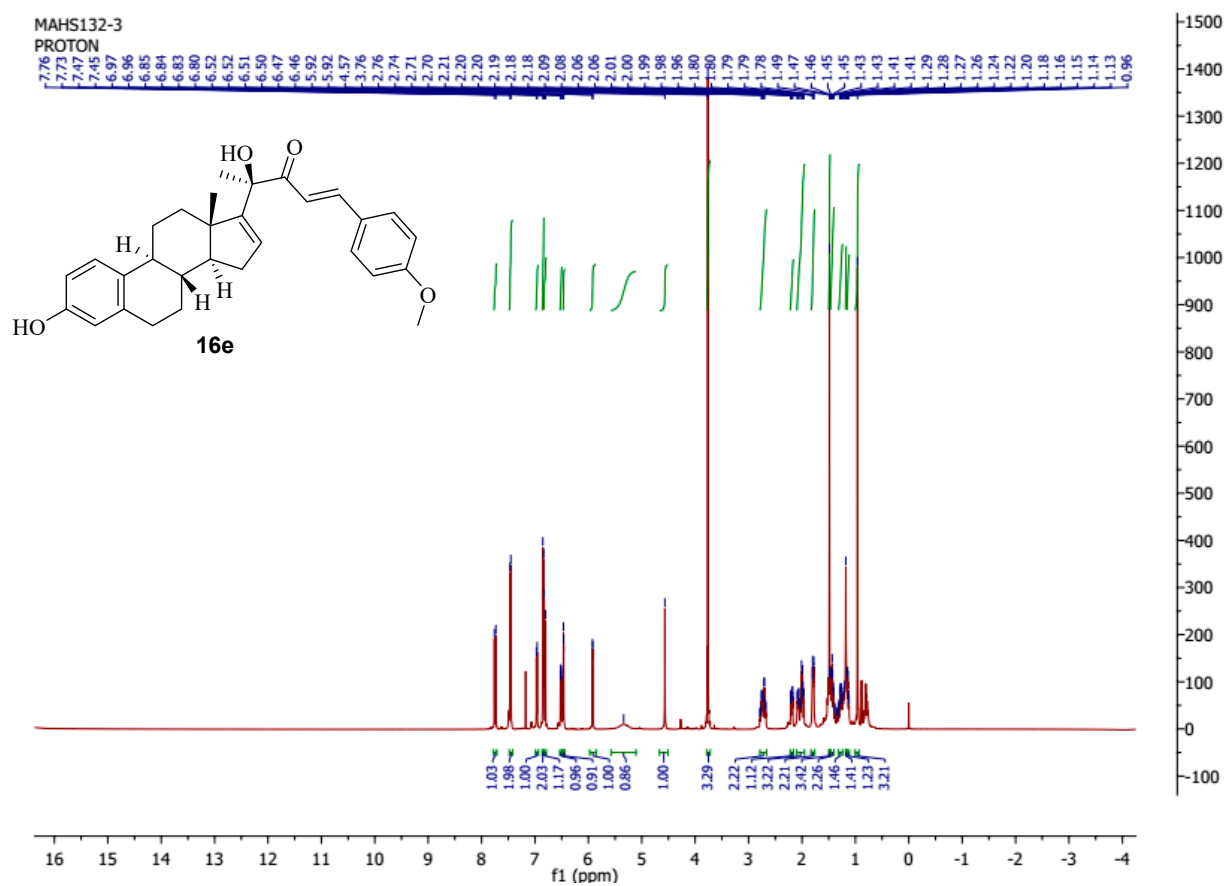

Figure S 57.  $^1\text{H}$  NMR of compound **16e**.

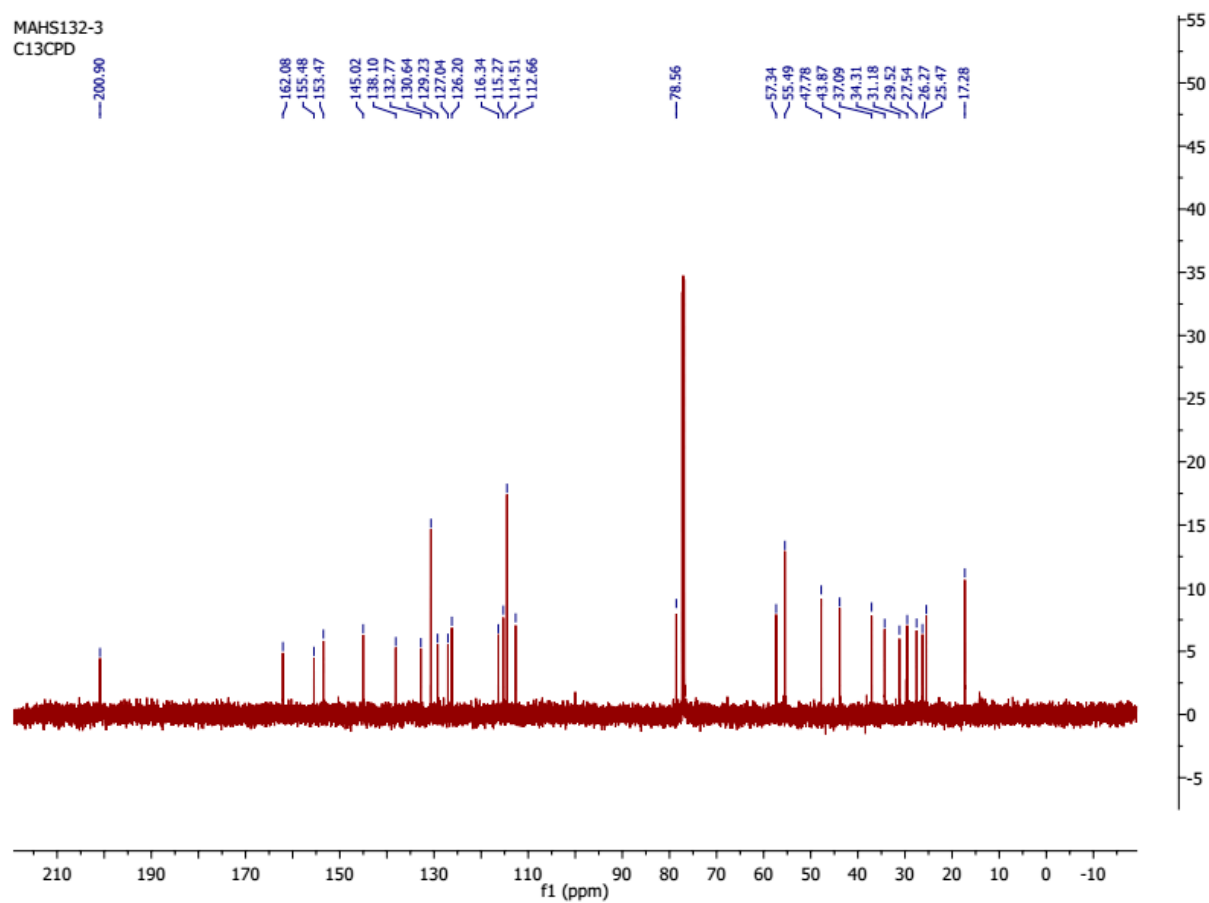

**Figure S 58.**  $^{13}\text{C}$  NMR of compound **16e**.

## 1.28 Compound 16f

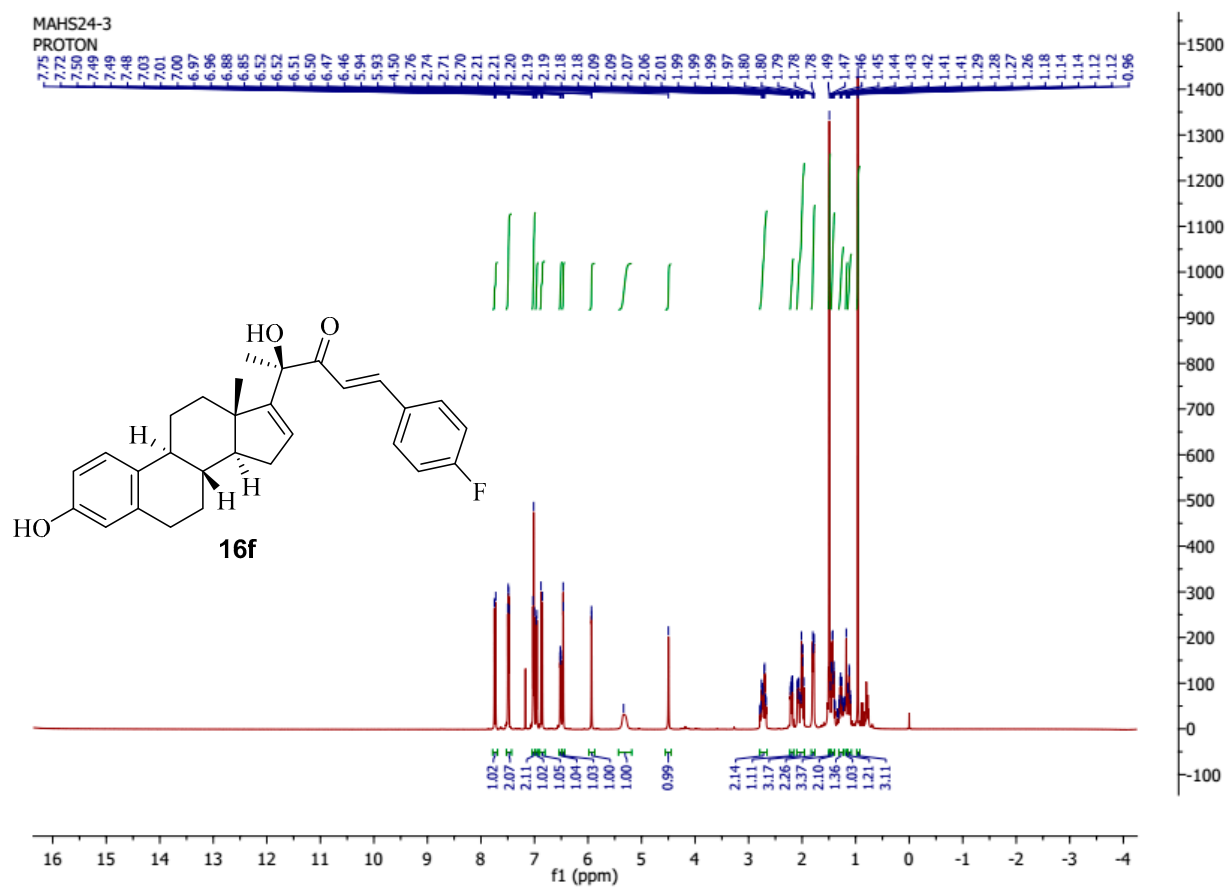

Figure S 59.  $^1\text{H}$  NMR of compound **16f**.

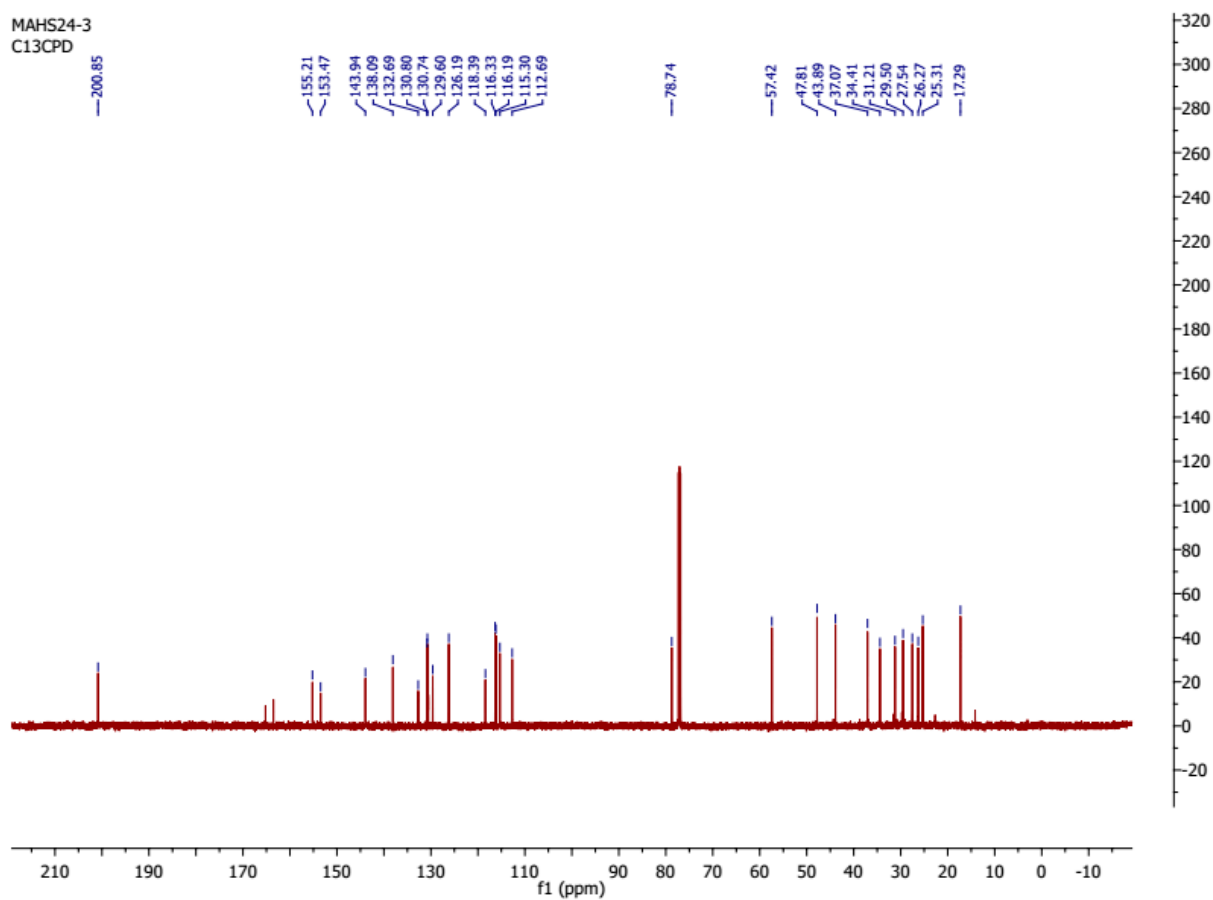

**Figure S 60.**  $^{13}\text{C}$  NMR of compound **16f**.

## 1.29 Compound 16g

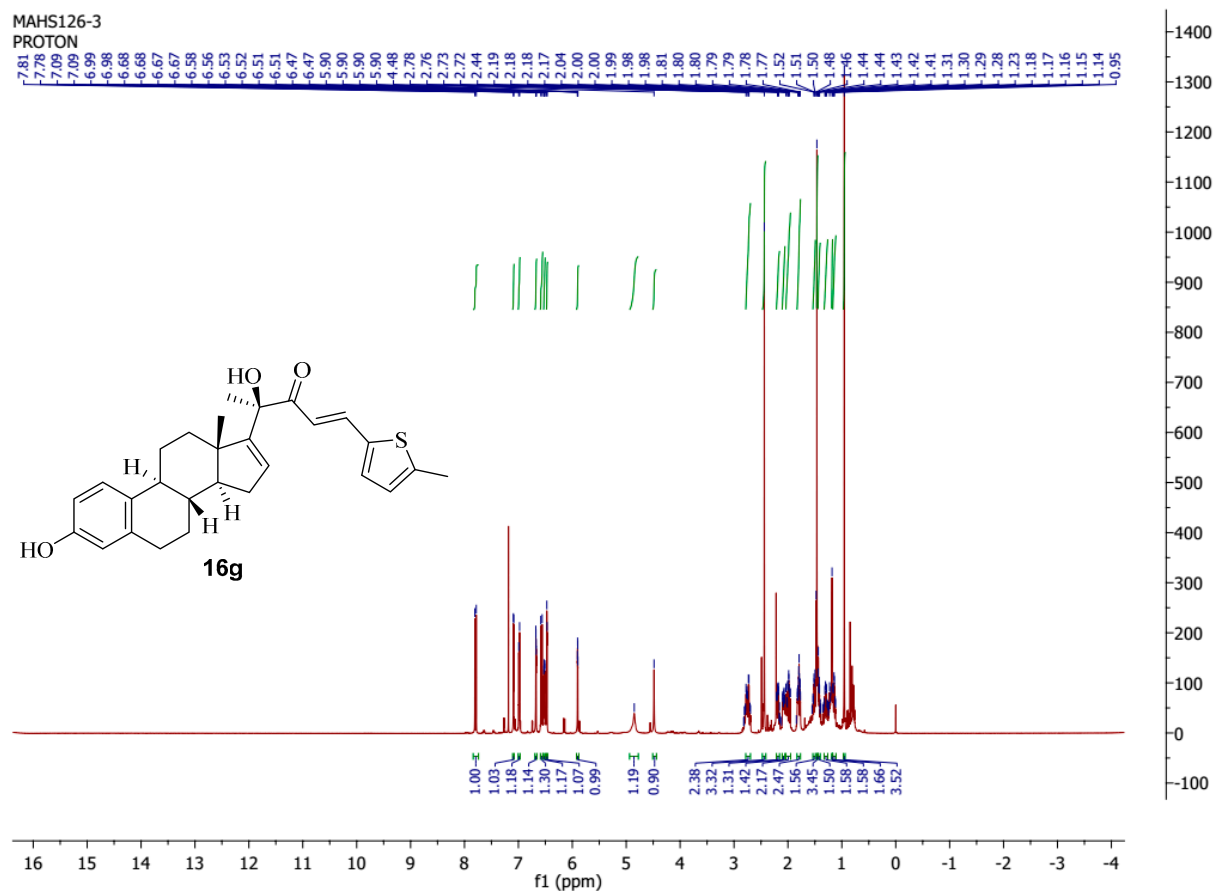

**Figure S 61.**  $^1\text{H}$  NMR of compound **16g**.

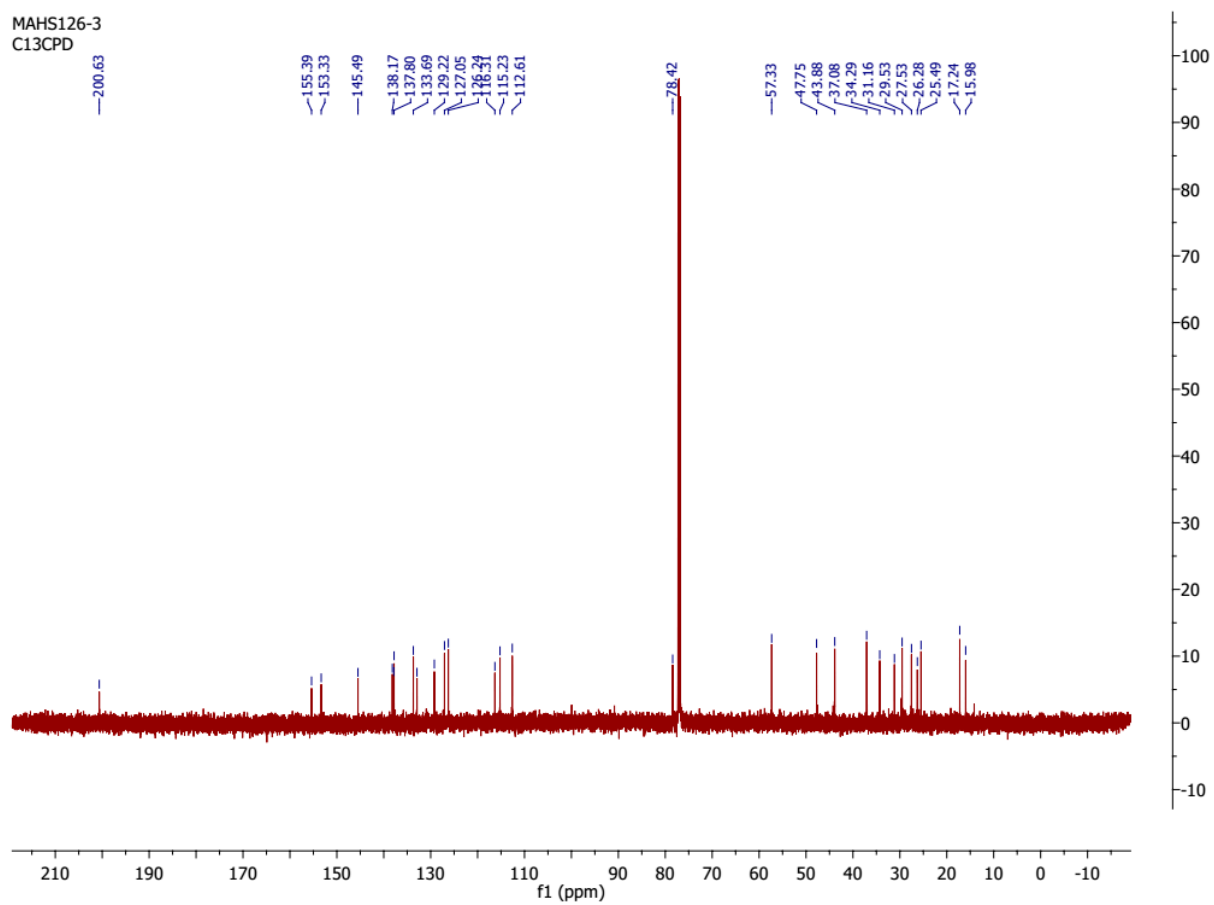

Figure S 62.  $^{13}\text{C}$  NMR of compound **16g**.

### 1.30 Compound 16h

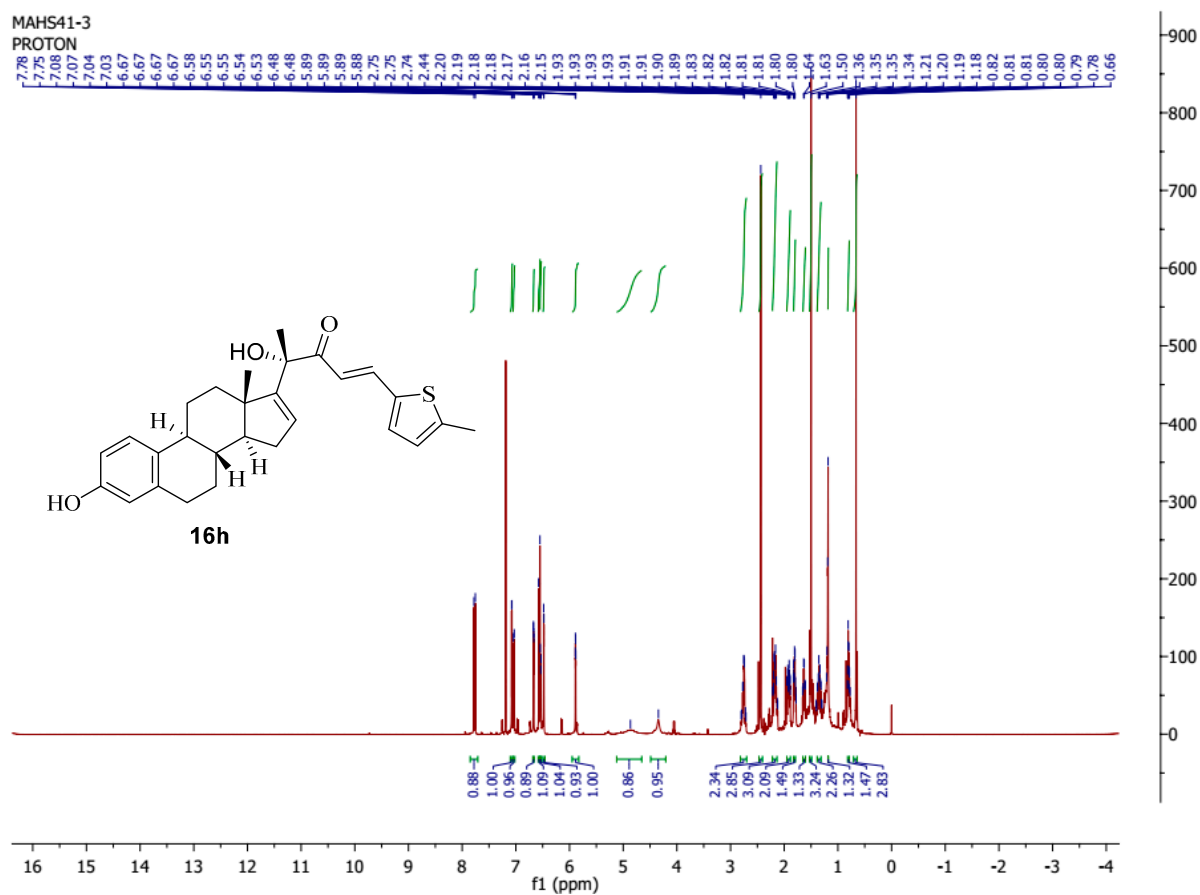

Figure S 63.  $^1\text{H}$  NMR of compound **16h**.

### 1.31 Compound 16i

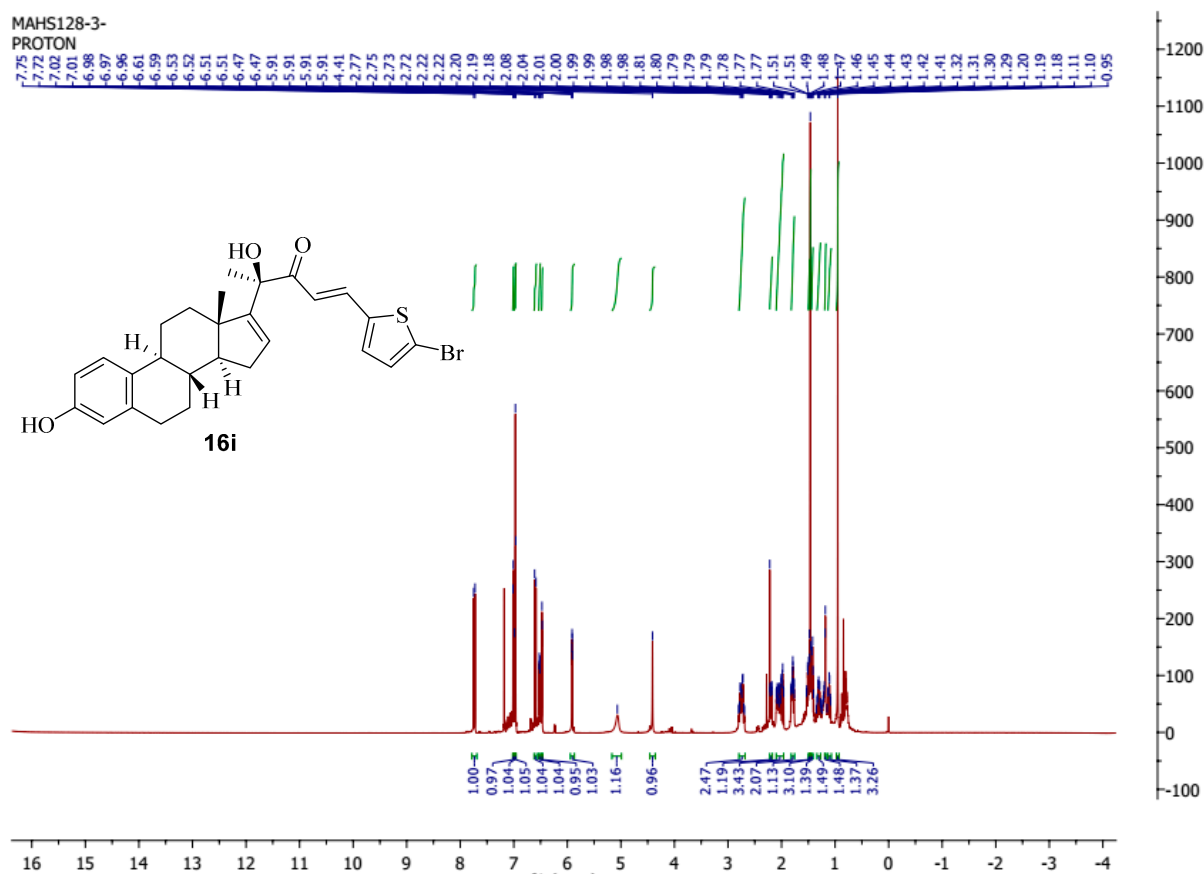

Figure S 64.  $^1\text{H}$  NMR of compound **16i**.



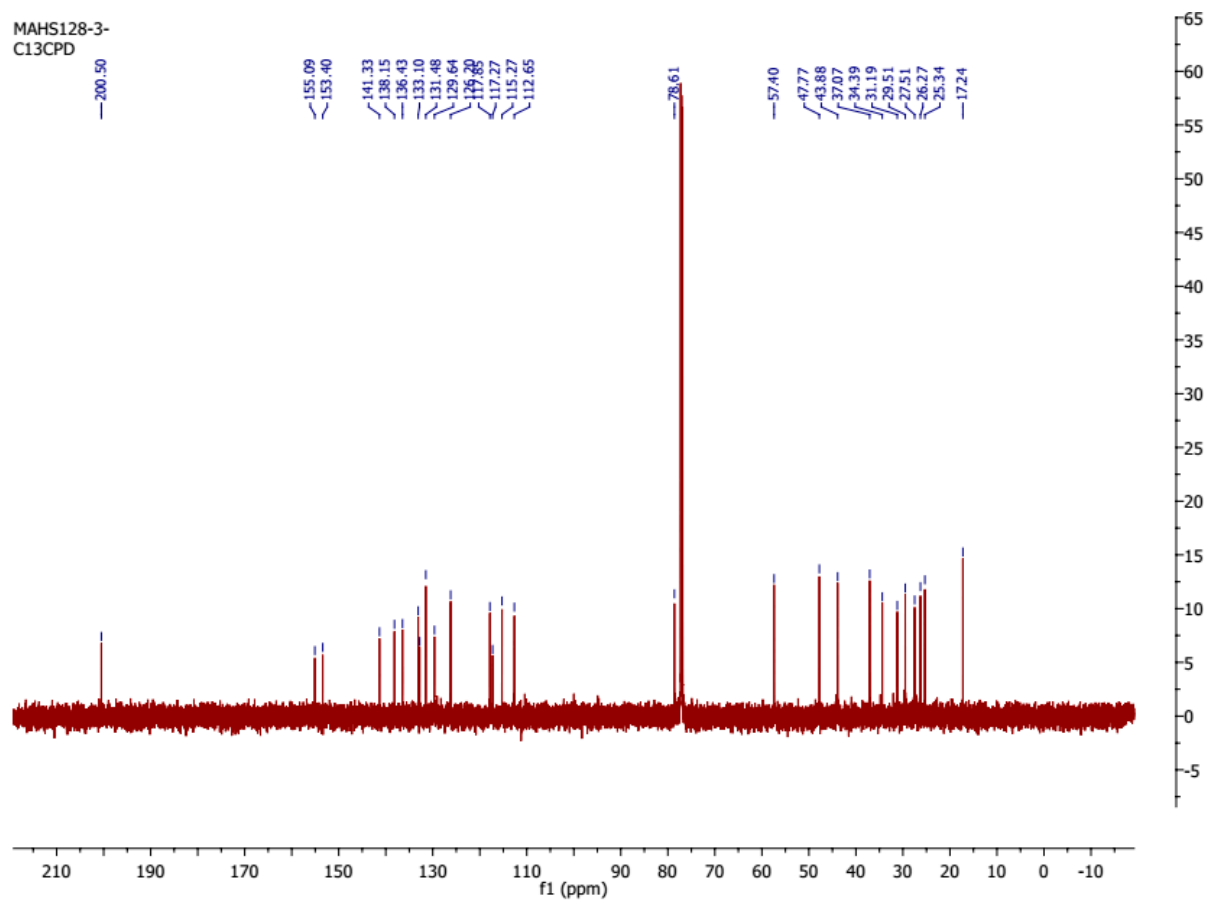

**Figure S 65.**  $^{13}\text{C}$  NMR of compound **16i**.

### 1.32 Compound 16j

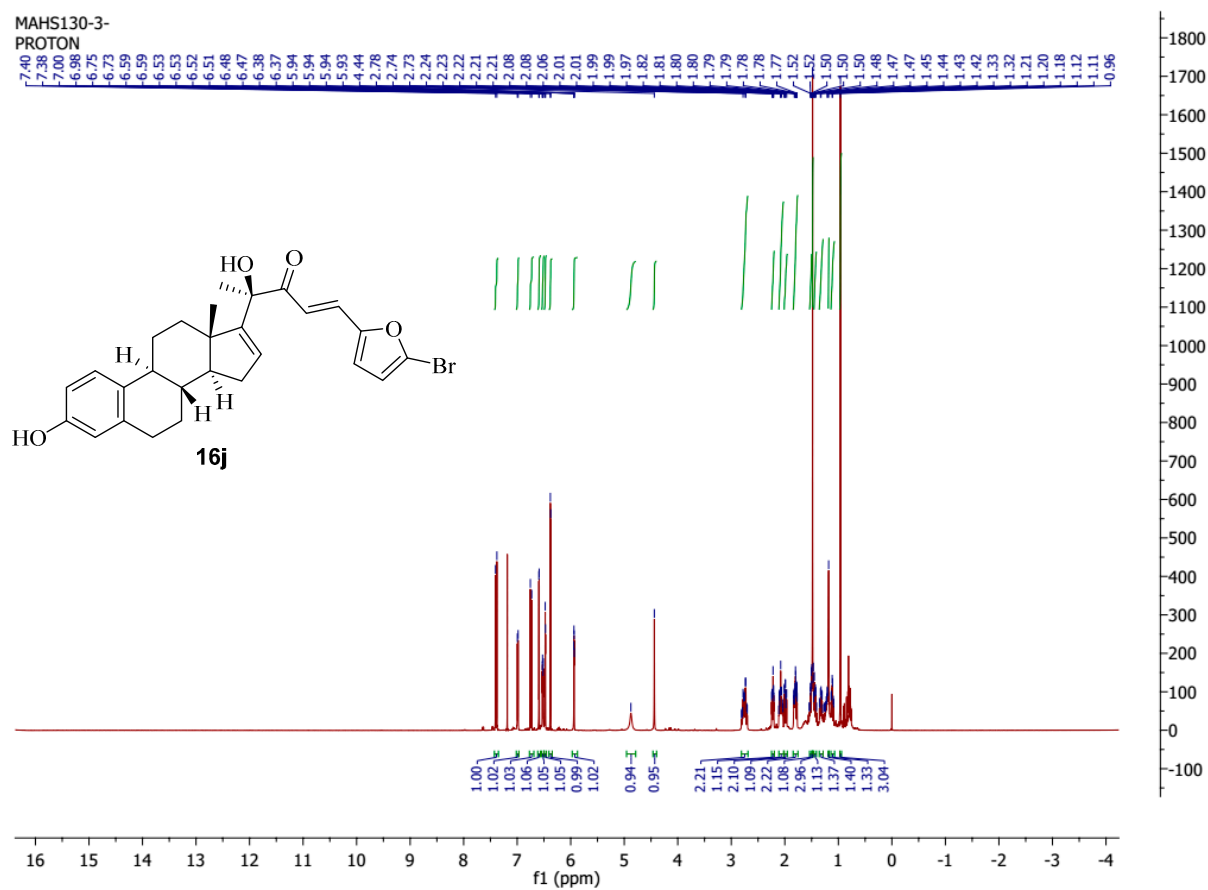

Figure S 66.  $^1\text{H}$  NMR of compound **16j**.

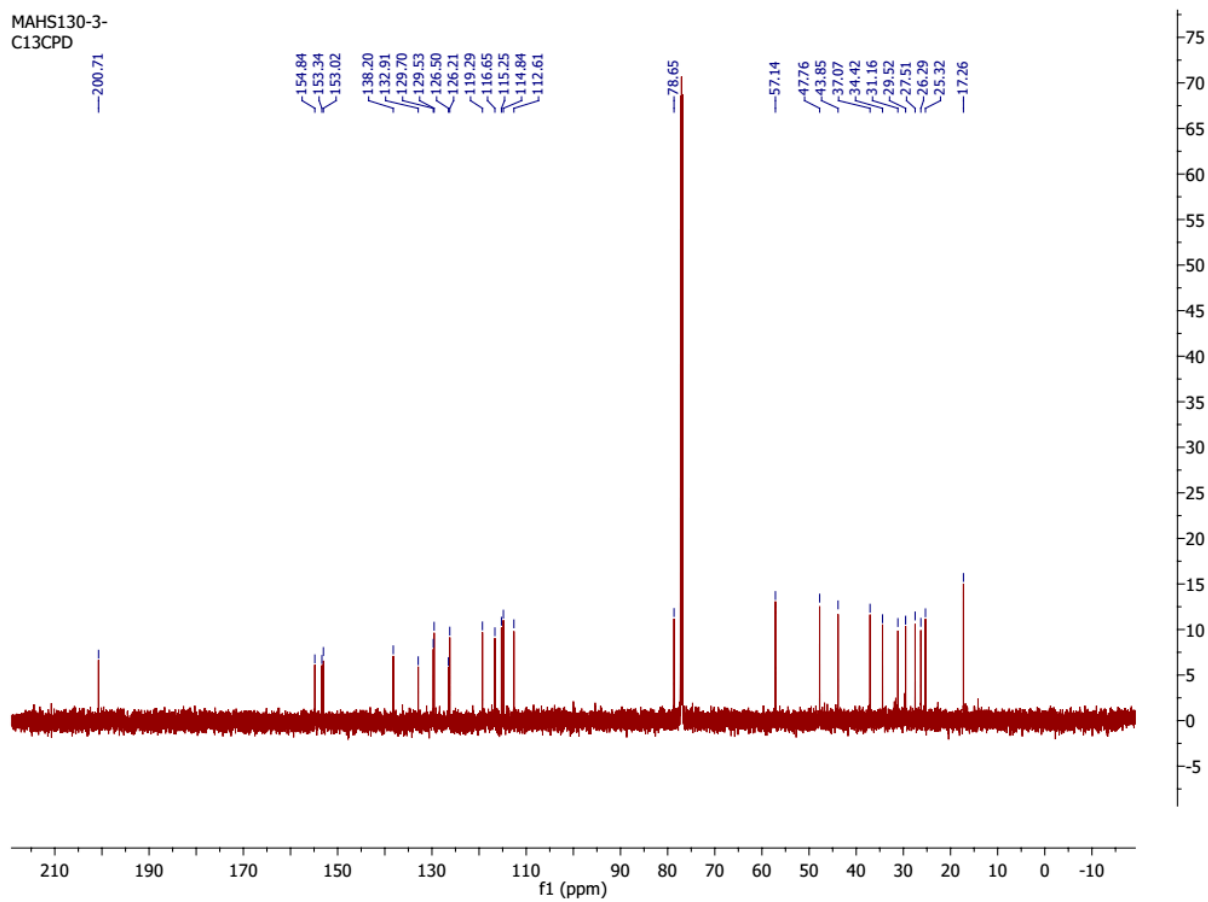

Figure S 67.  $^{13}\text{C}$  NMR of compound 16j.

### 1.33 Compound 17a

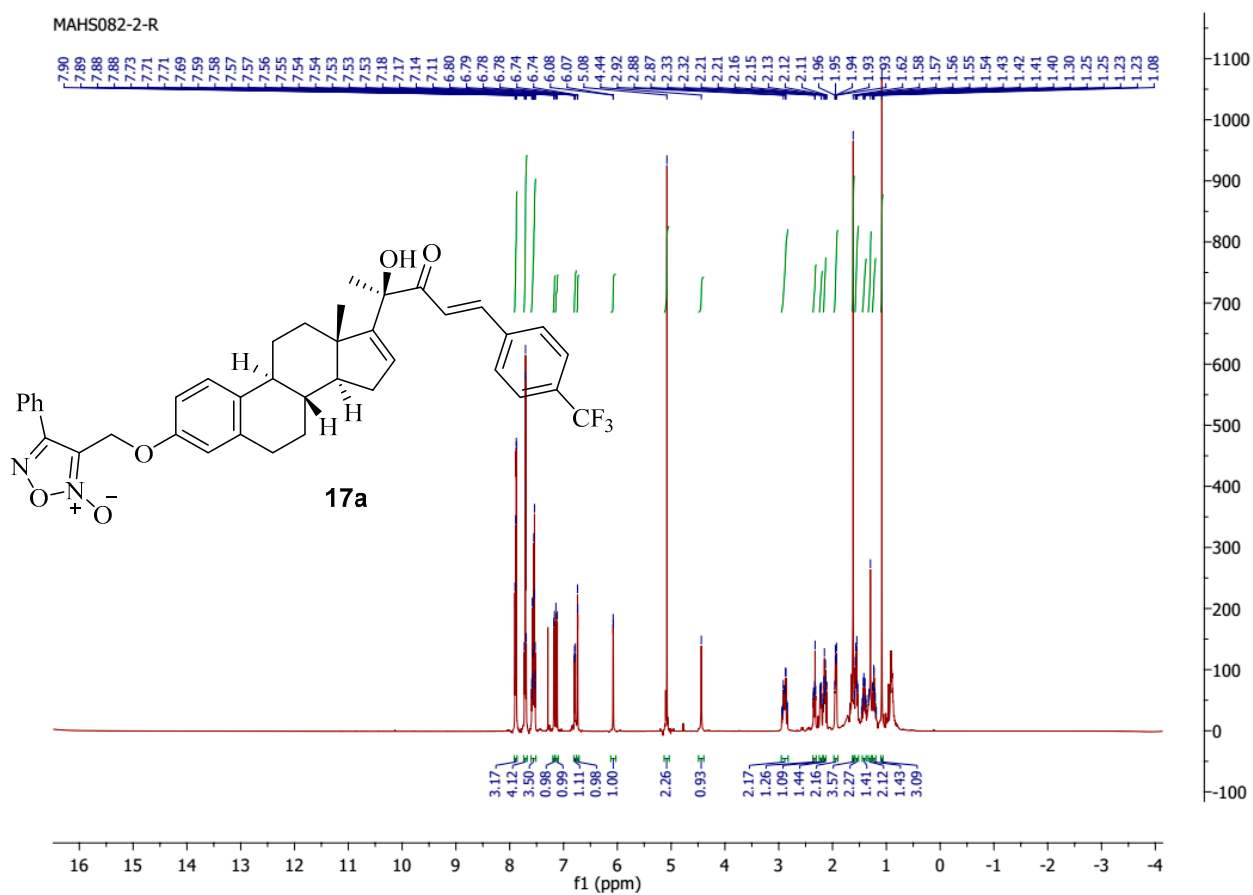

**Figure S 68.** <sup>1</sup>H NMR of compound **17a**.

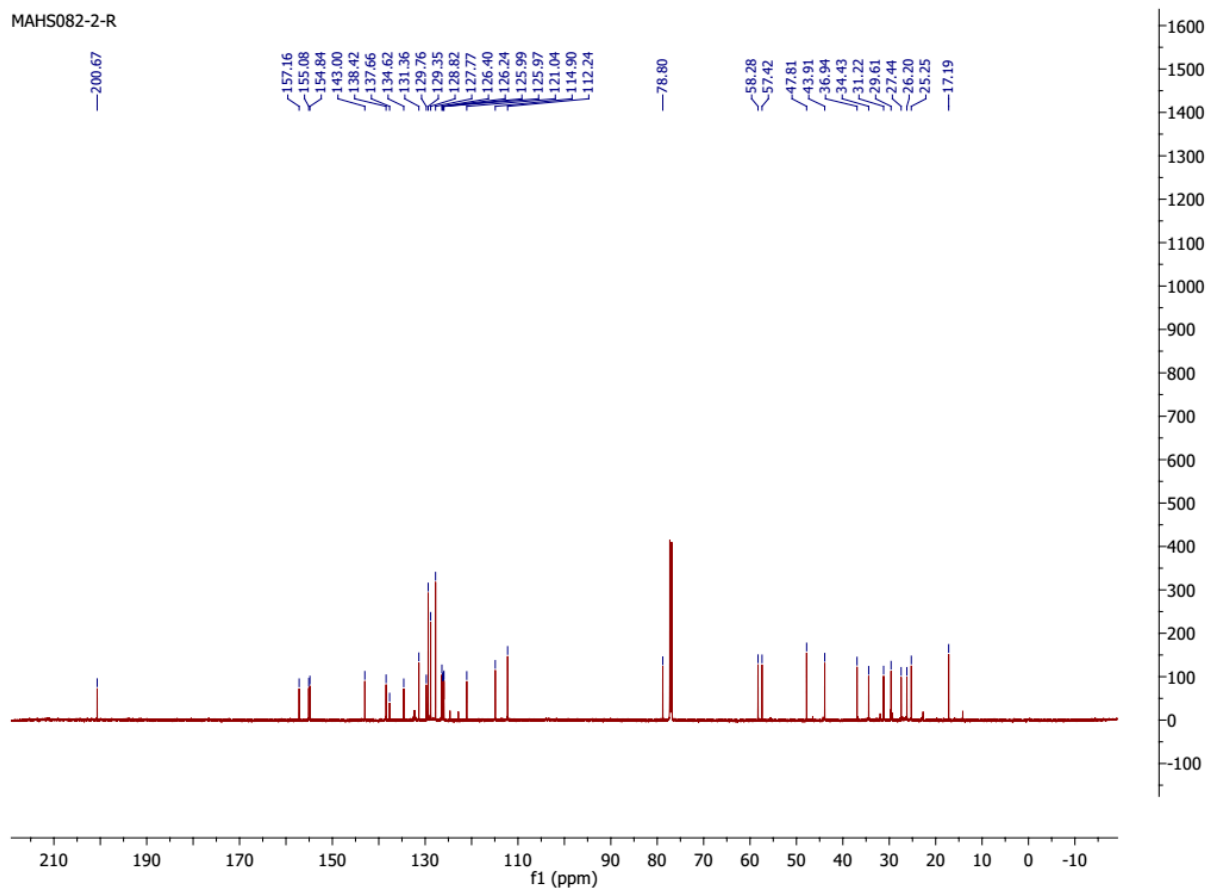

**Figure S 69.**  $^{13}\text{C}$  NMR of compound **17a**.

### 1.34 Compound 17b

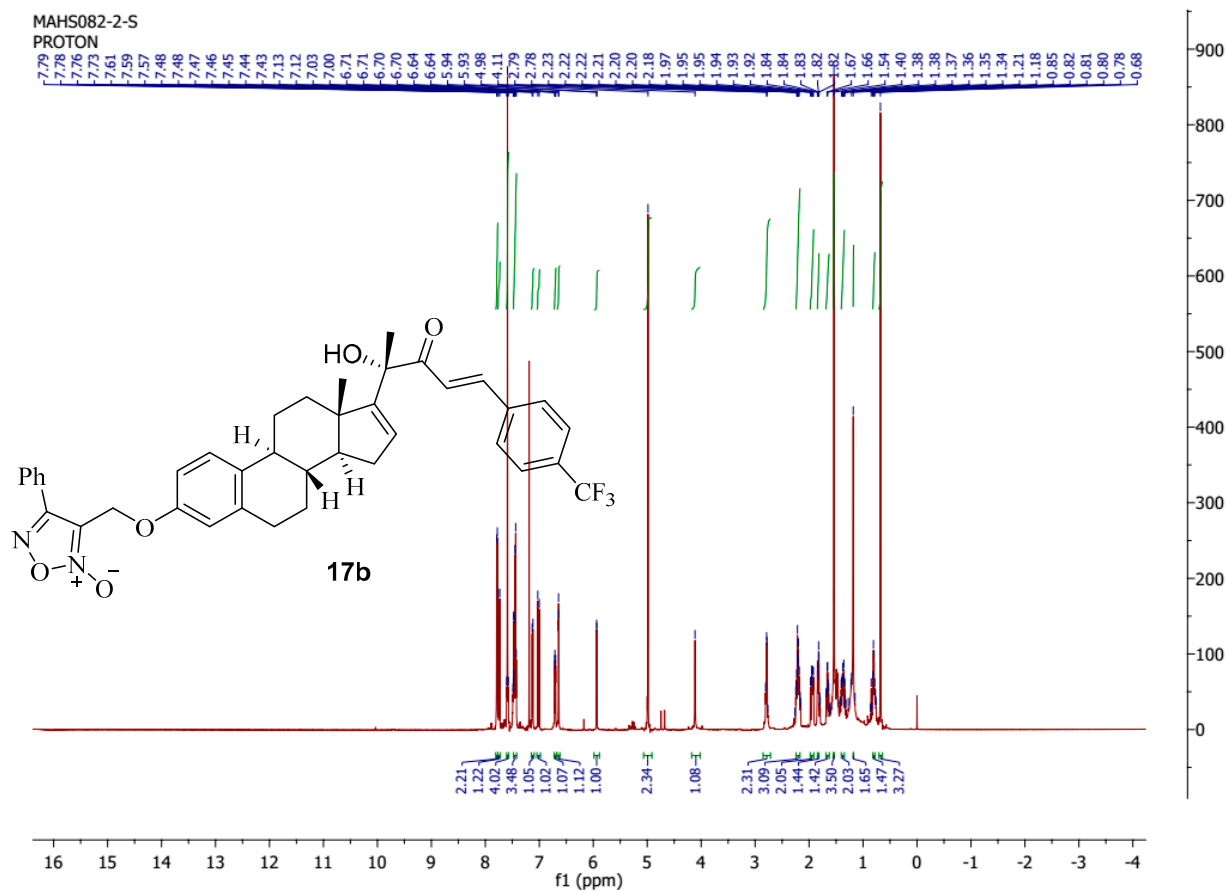

**Figure S 70.**  $^1\text{H}$  NMR of compound **17b**.

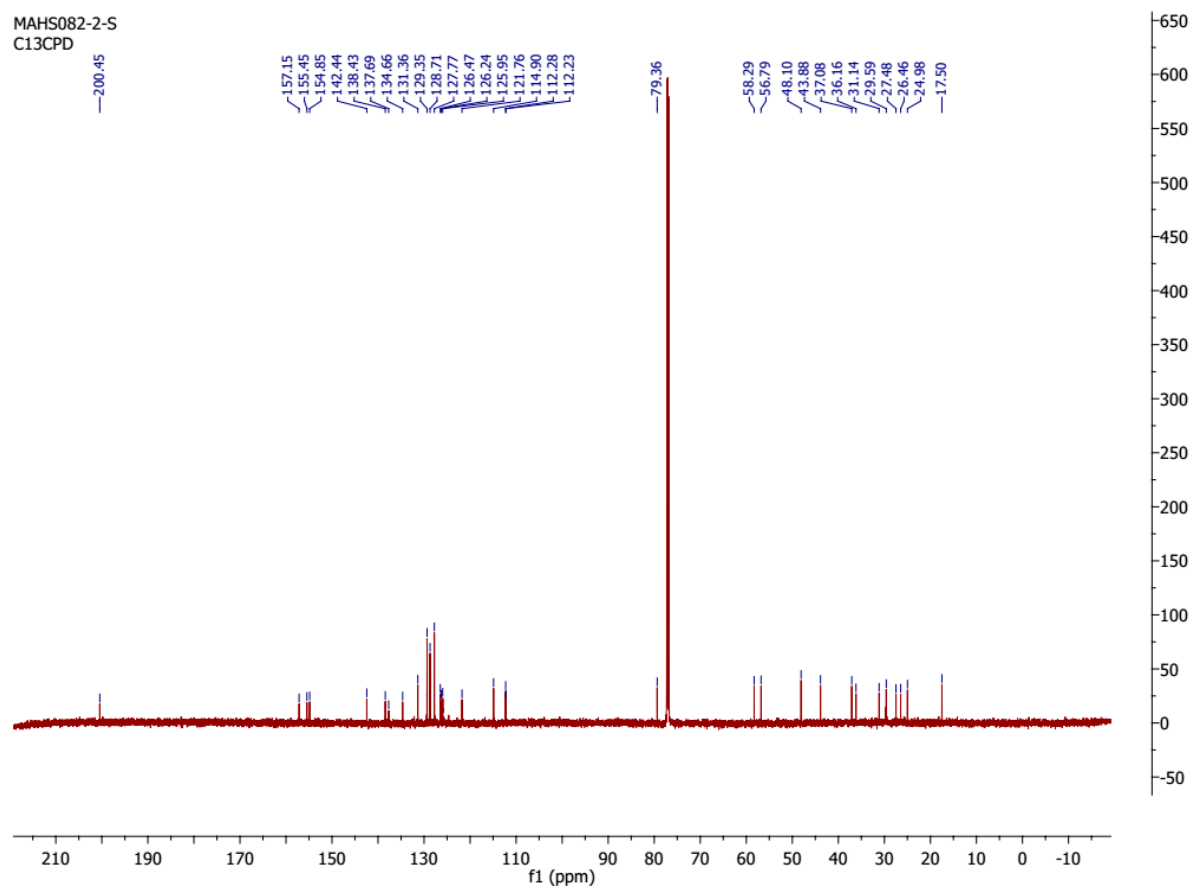

**Figure S 71.**  $^{13}\text{C}$  NMR of compound **17b**.

### 1.35 Compound 17c

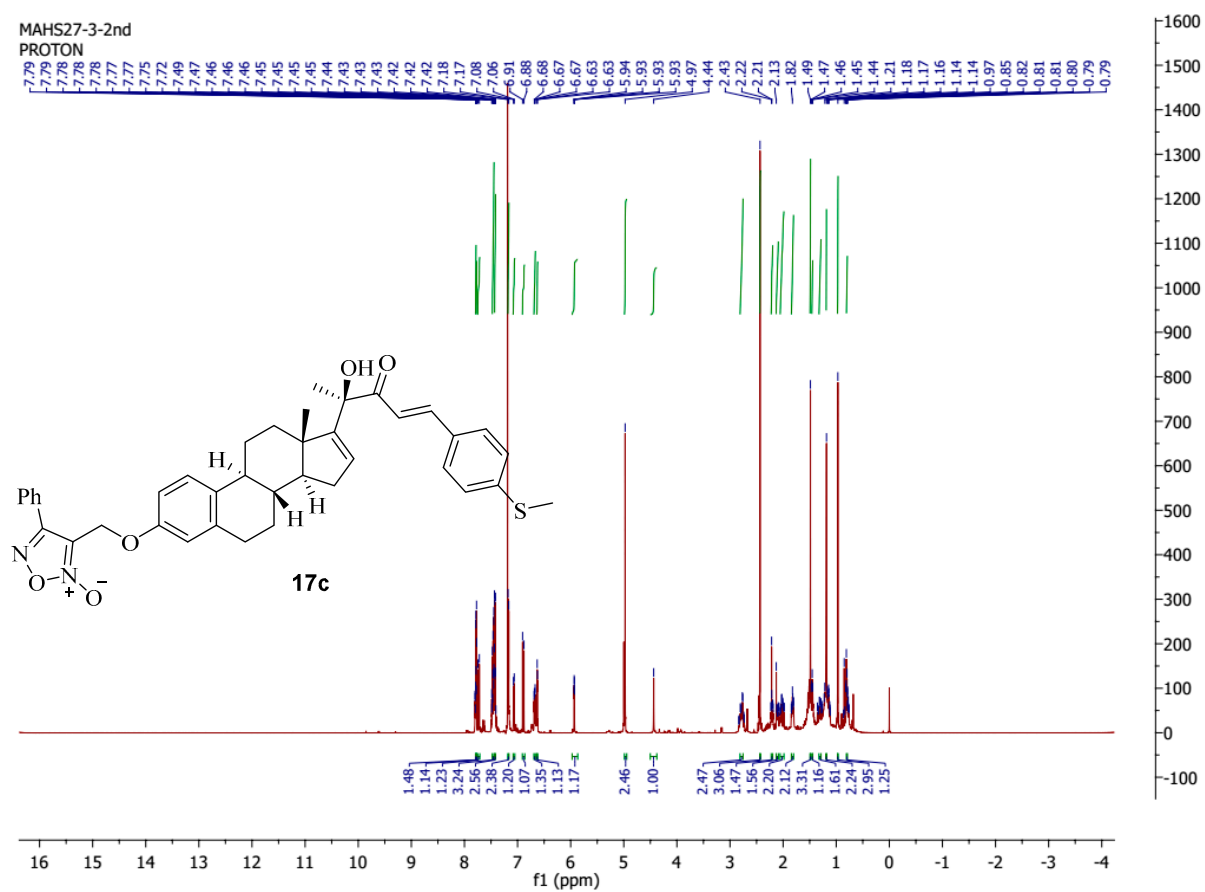

Figure S 72.  $^1\text{H}$  NMR of compound **17c**.



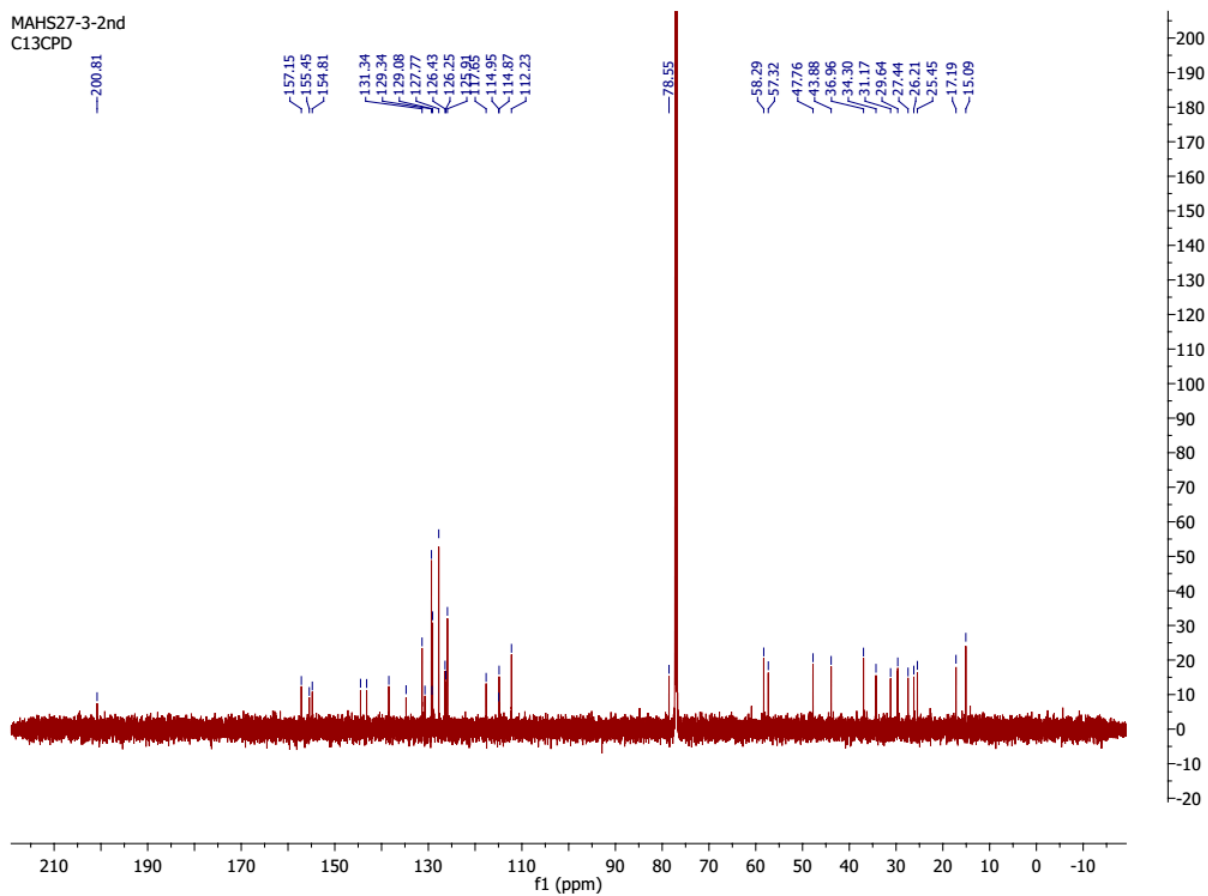

**Figure S 73.**  $^{13}\text{C}$  NMR of compound **17c**.

### 1.36 Compound 17d

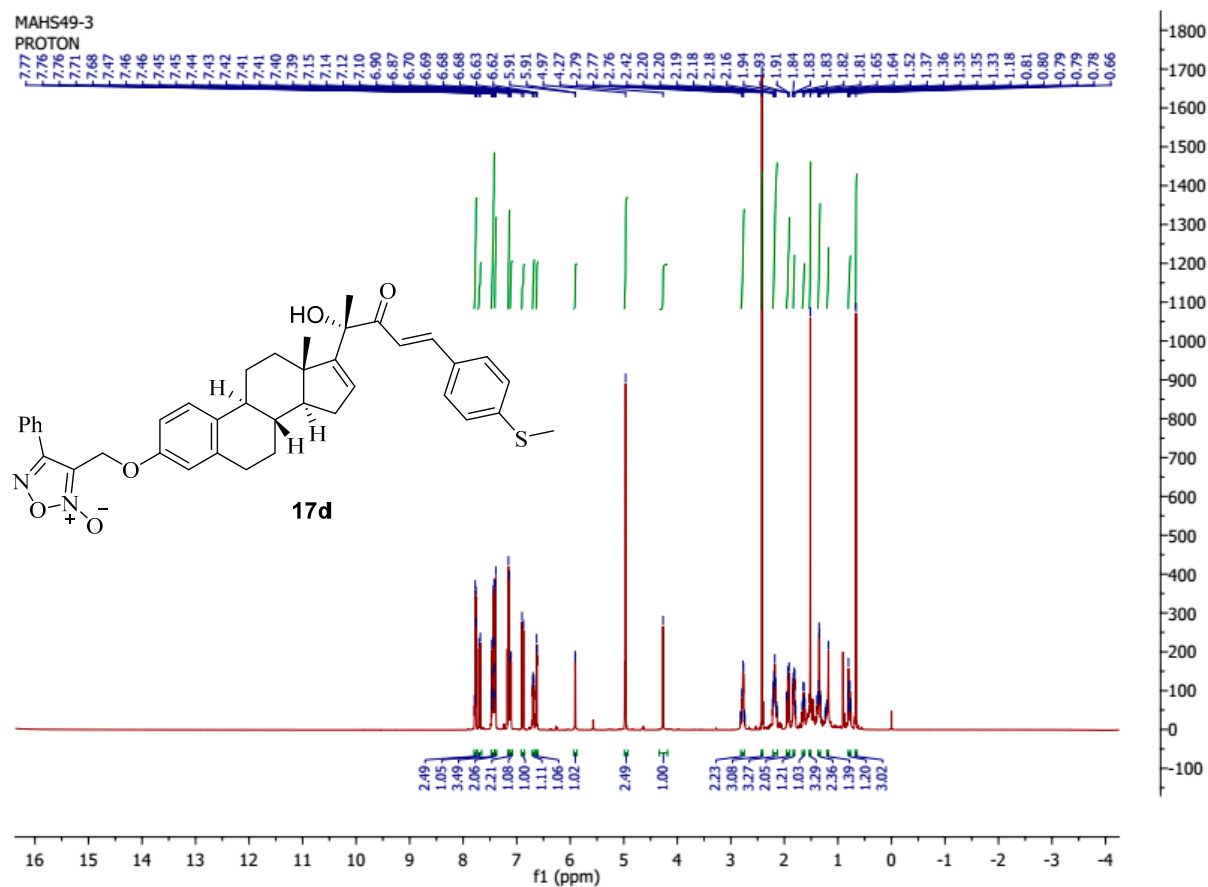

**Figure S 74.**  $^1\text{H}$  NMR of compound **17d**.

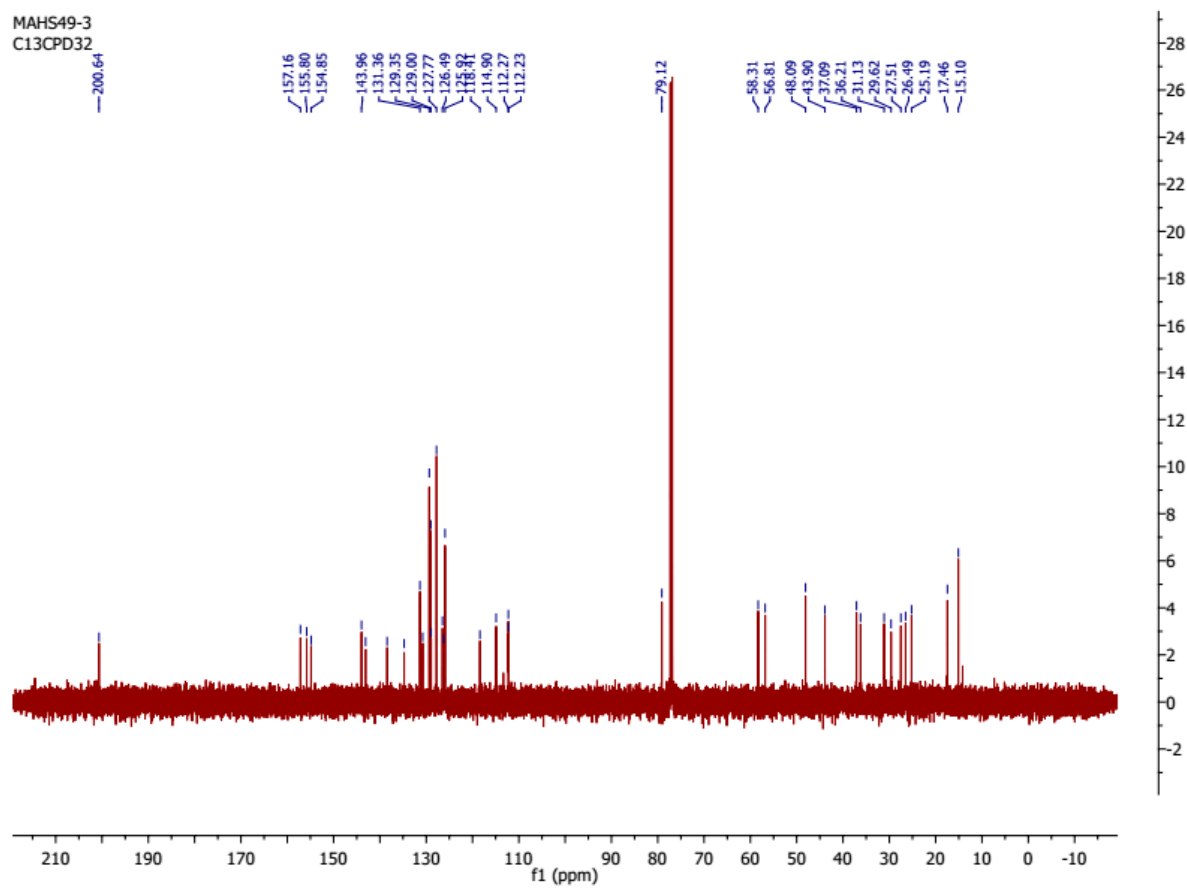

**Figure S 75.**  $^{13}\text{C}$  NMR of compound **17d**.

### 1.37 Compound 17e

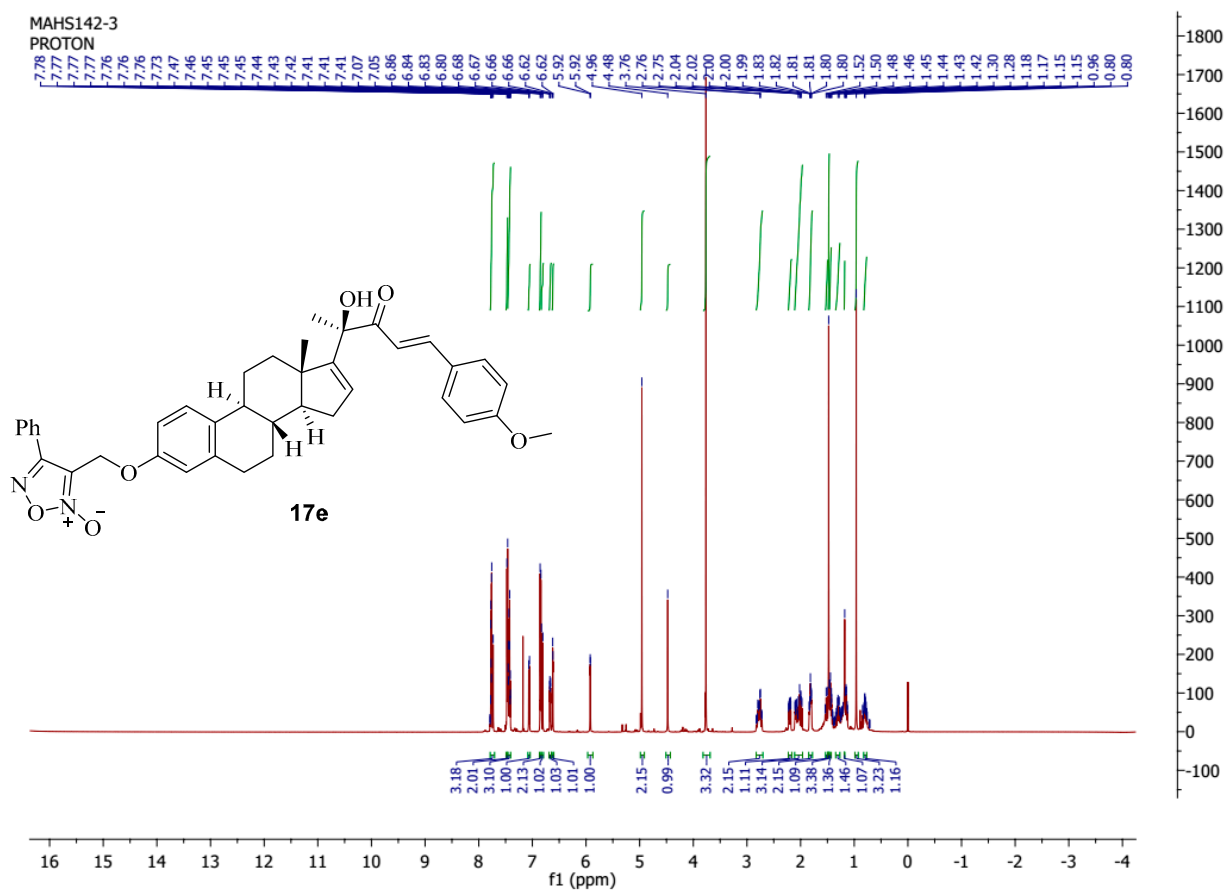

Figure S 76.  $^1\text{H}$  NMR of compound **17e**.

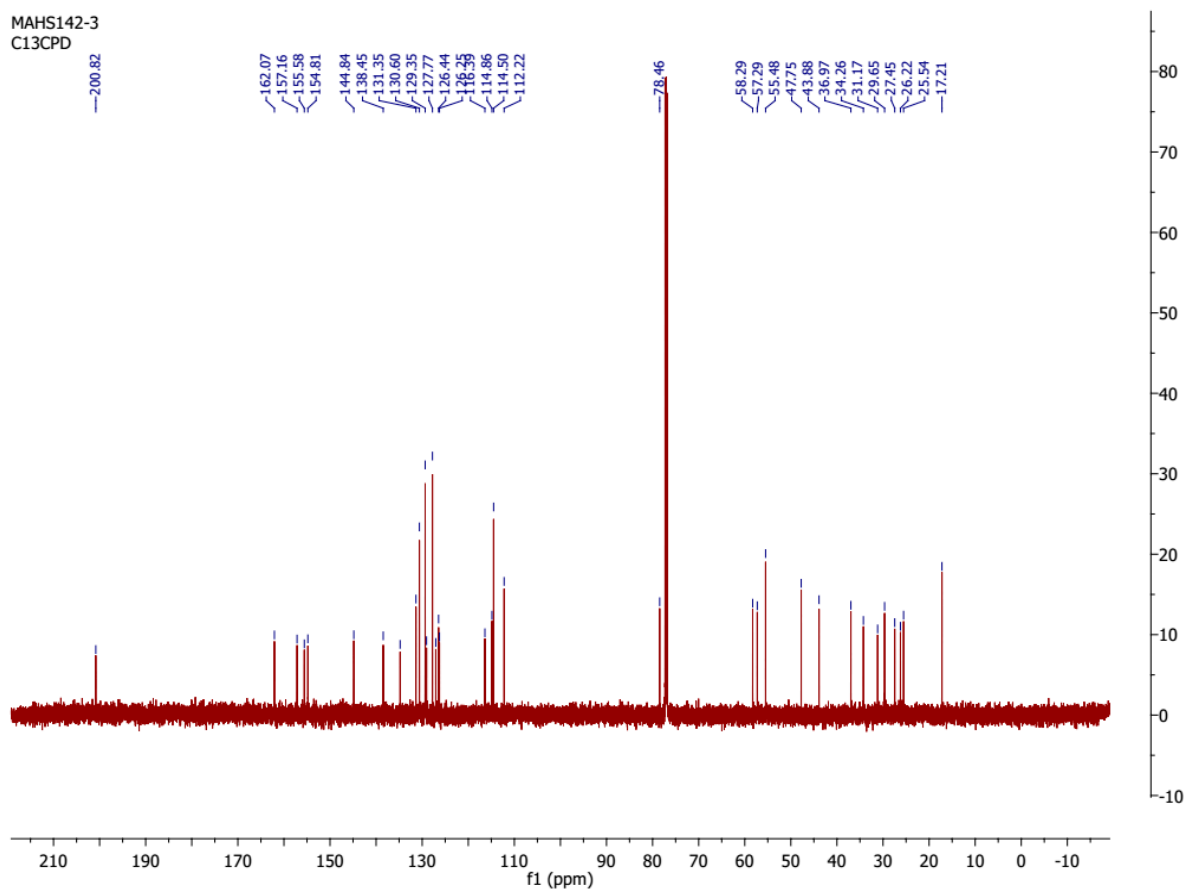

**Figure S 77.**  $^{13}\text{C}$  NMR of compound **17e**.

### 1.38 Compound 17f

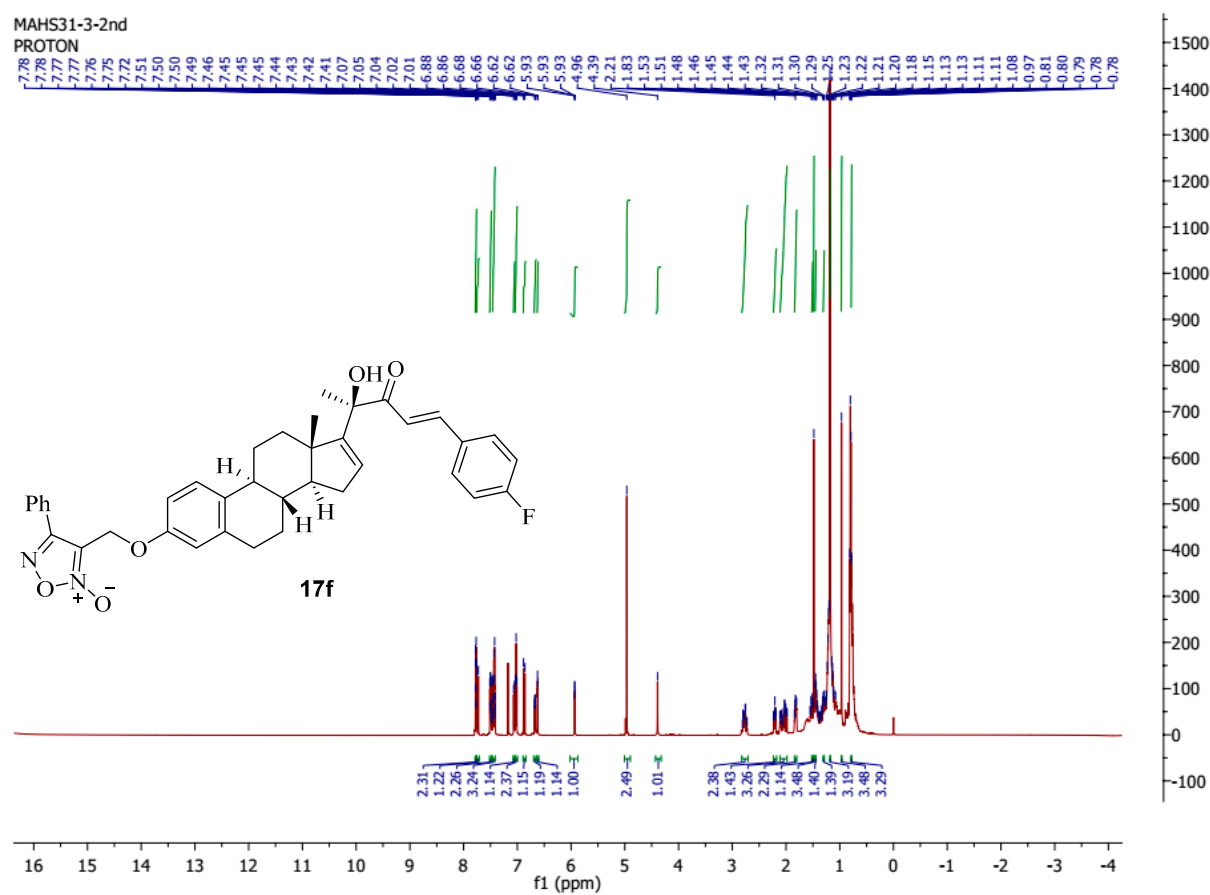

Figure S 78. <sup>1</sup>H NMR of compound 17f.

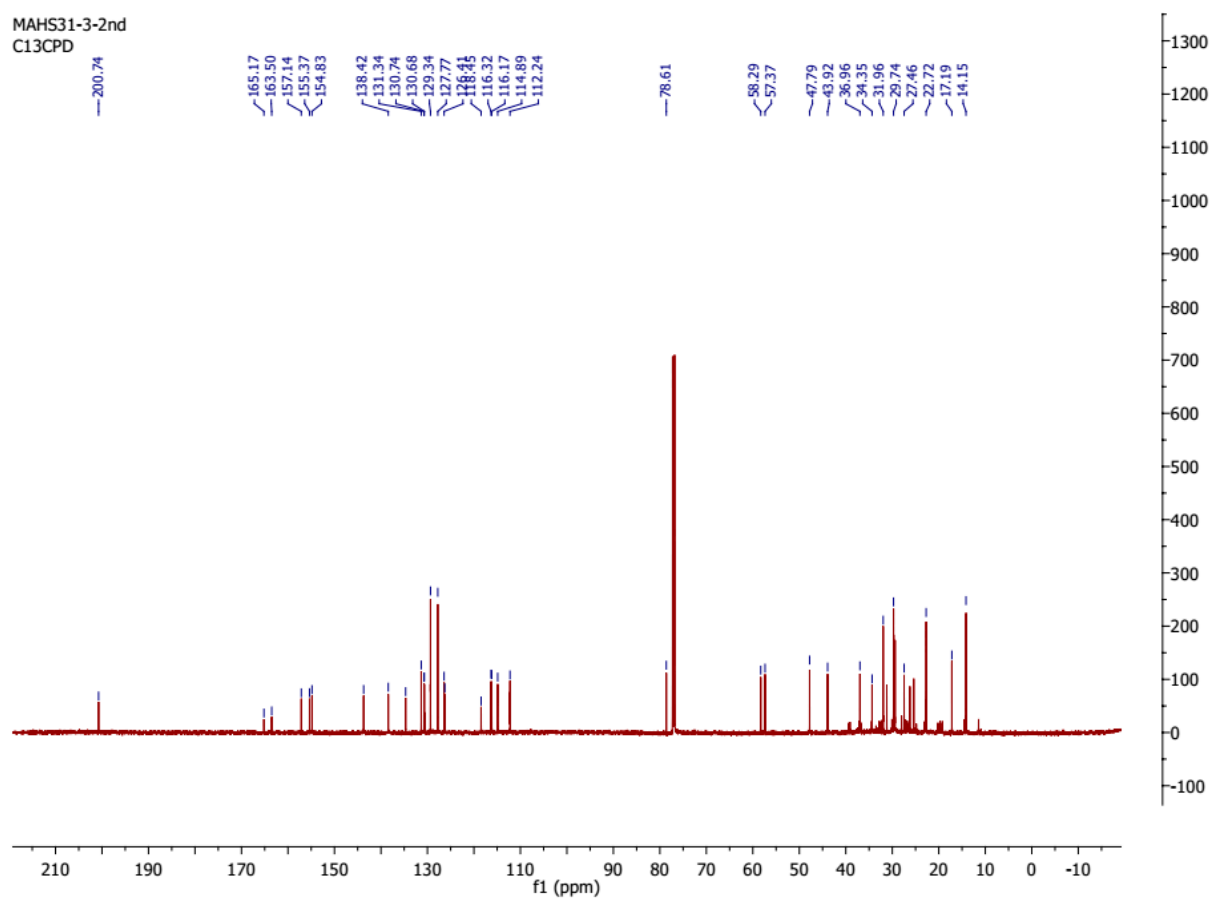

**Figure S 79.**  $^{13}\text{C}$  NMR of compound **17f**.

### 1.39 Compound 17g

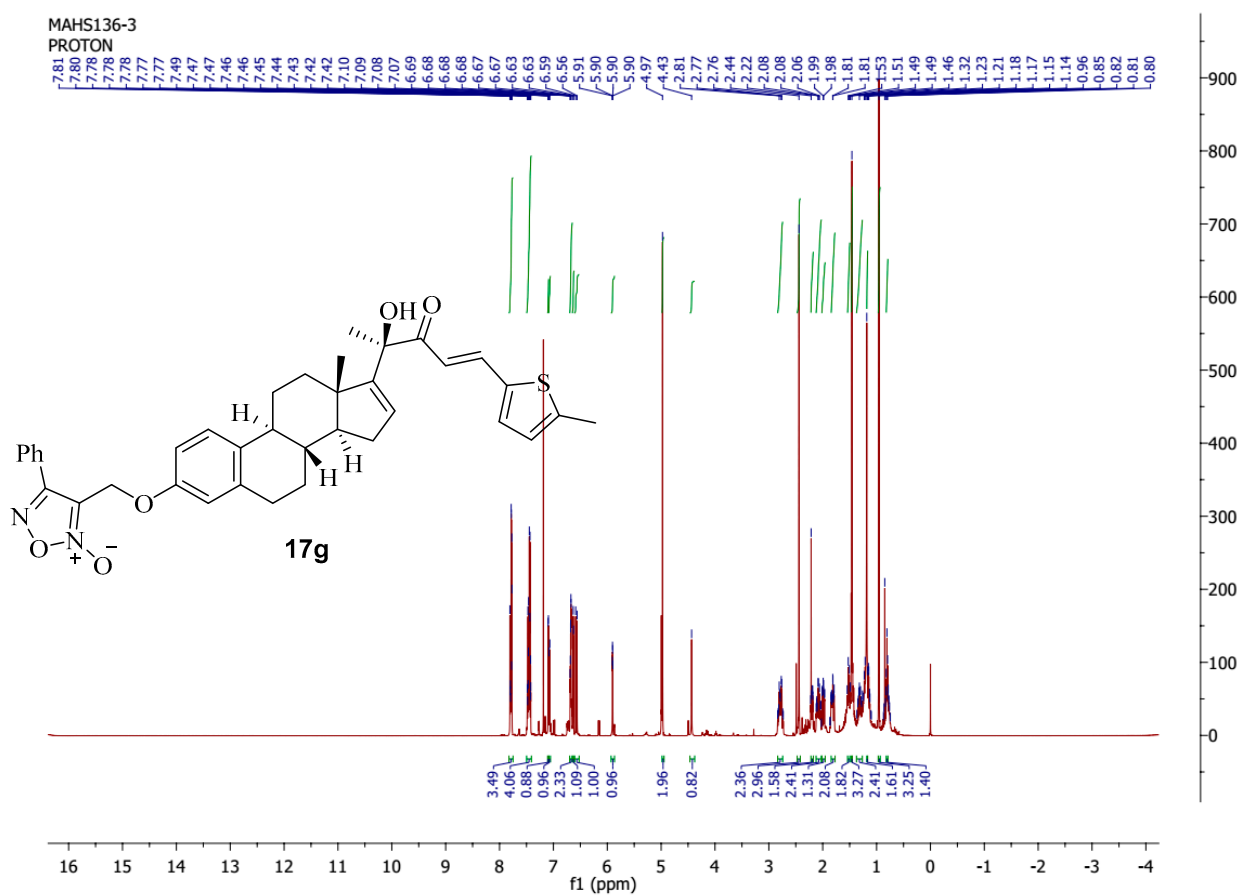

**Figure S 80.**  $^1\text{H}$  NMR of compound **17g**.



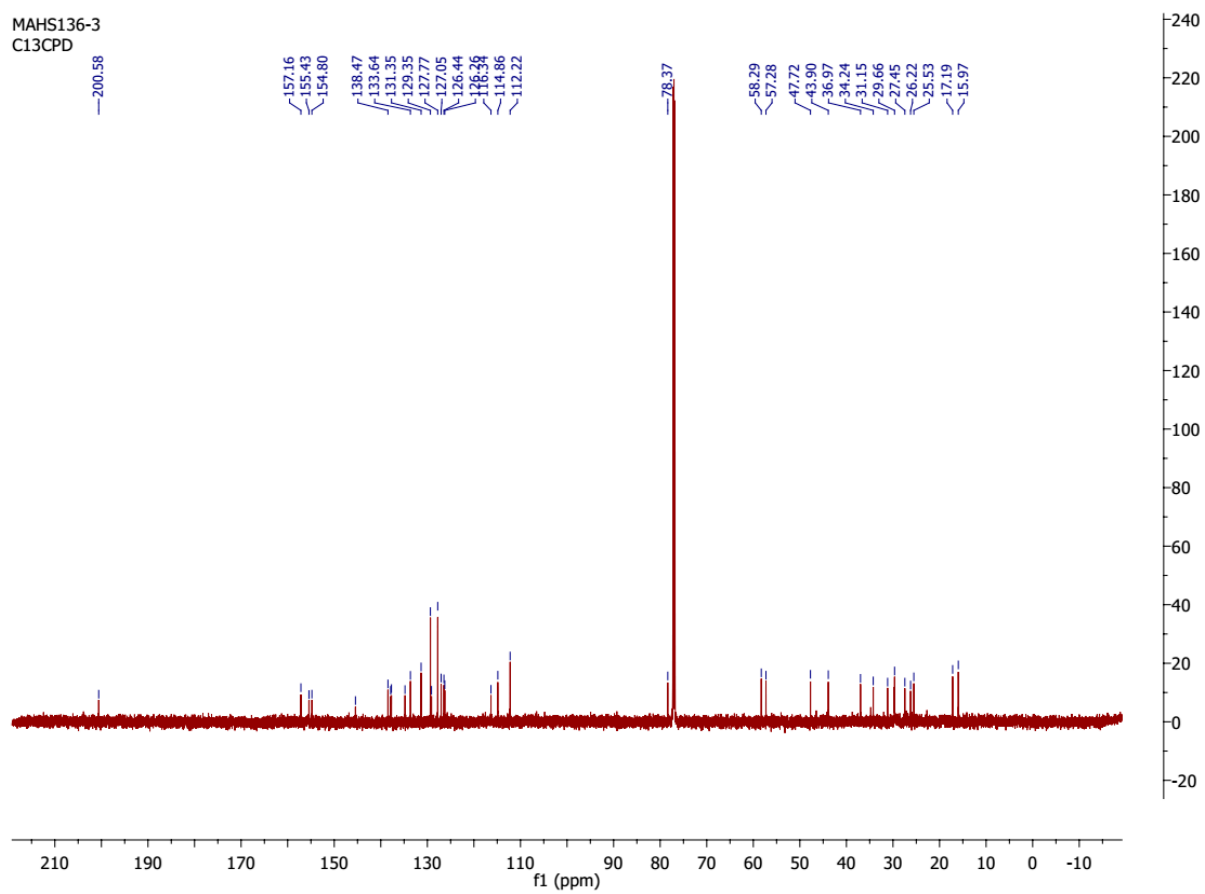

**Figure S 81.**  $^{13}\text{C}$  NMR of compound **17g**.

### 1.40 Compound 17h

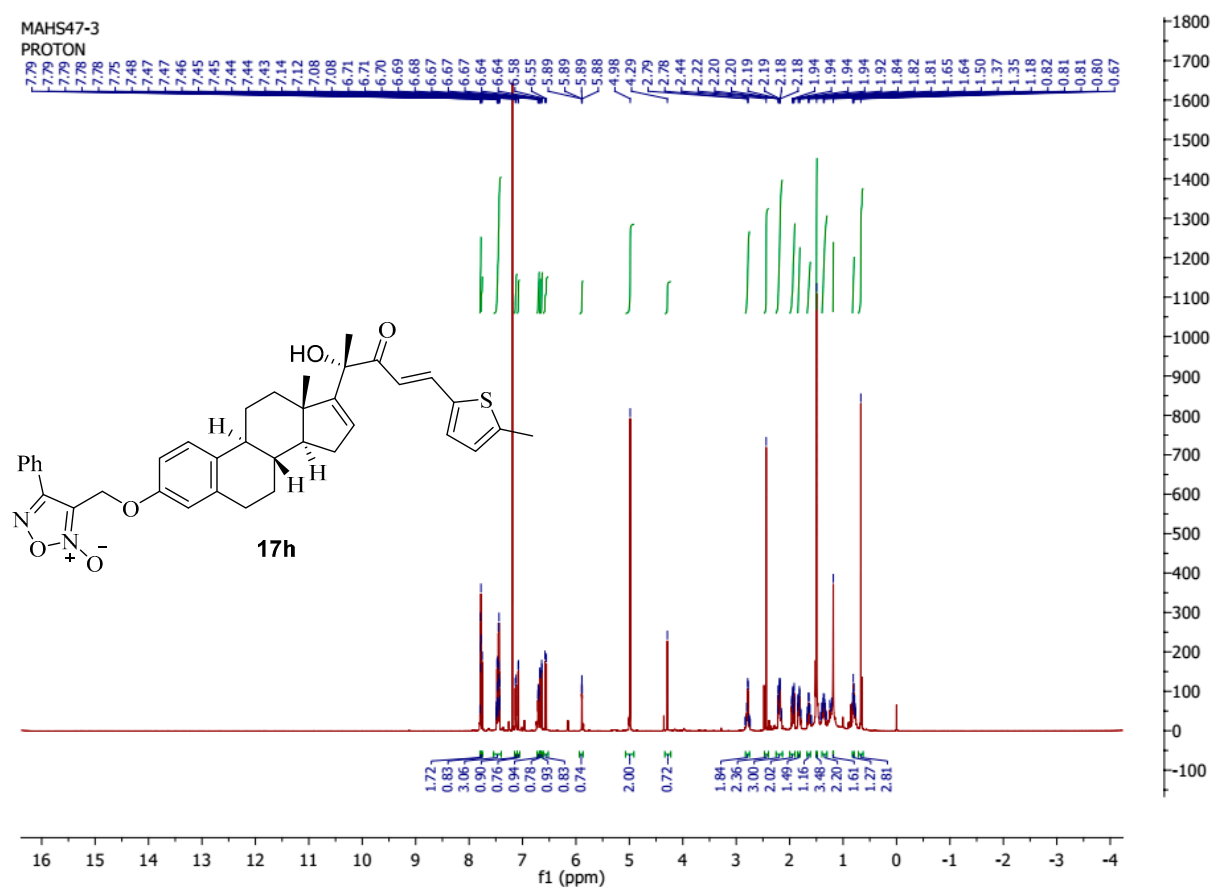

Figure S 82.  $^1\text{H}$  NMR of compound **17h**.

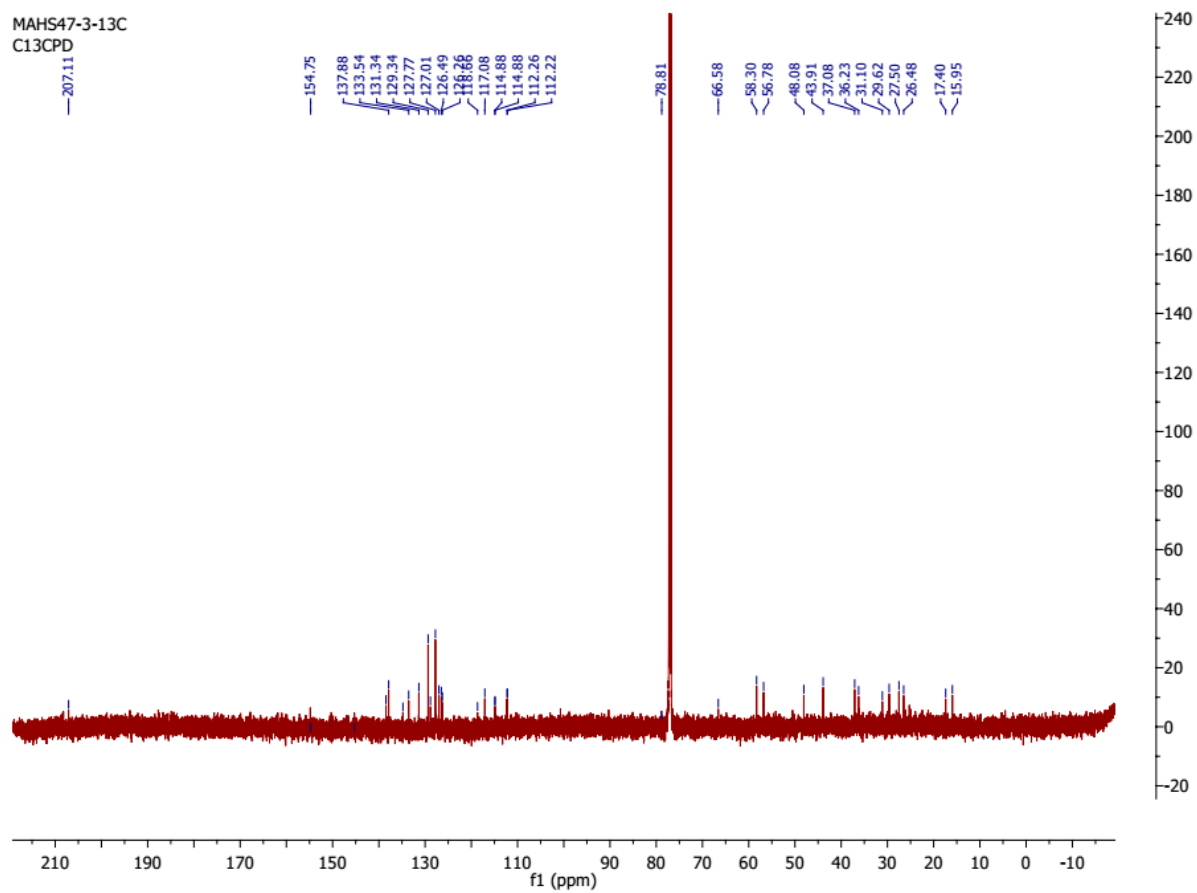

**Figure S 83.**  $^{13}\text{C}$  NMR of compound **17h**.

### 1.41 Compound 17i

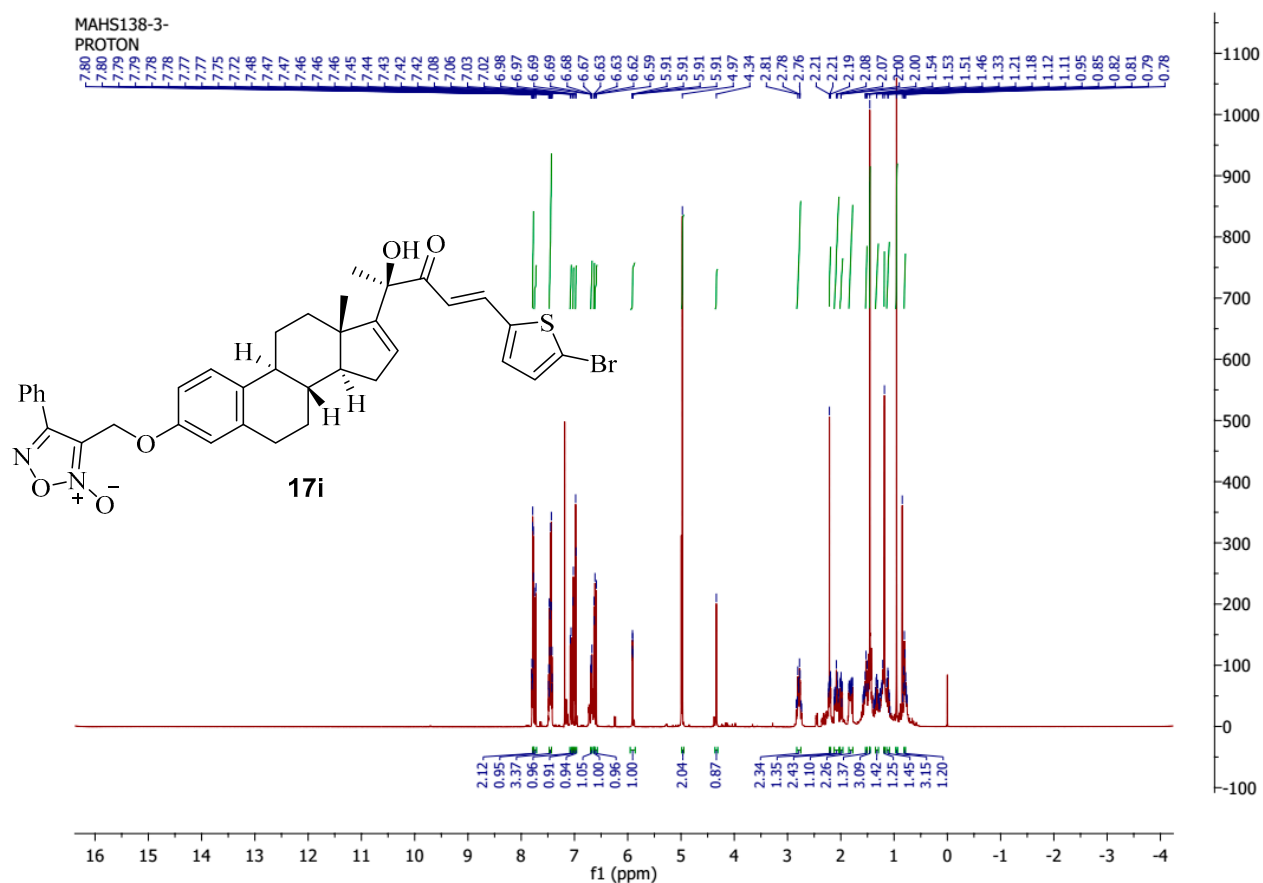

Figure S 84.  $^1\text{H}$  NMR of compound **17i**.

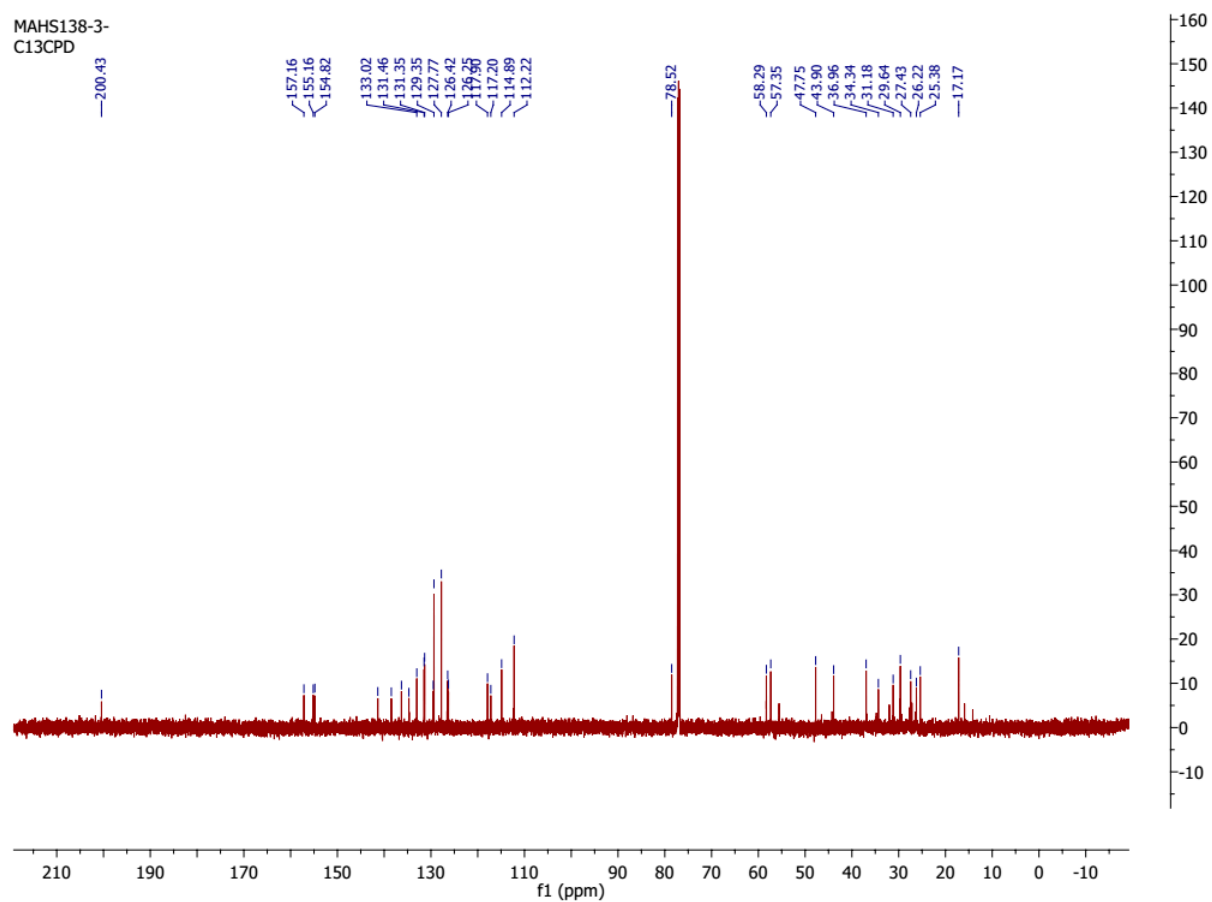

**Figure S 85.**  $^{13}\text{C}$  NMR of compound **17i**.

### 1.42 Compound 17j

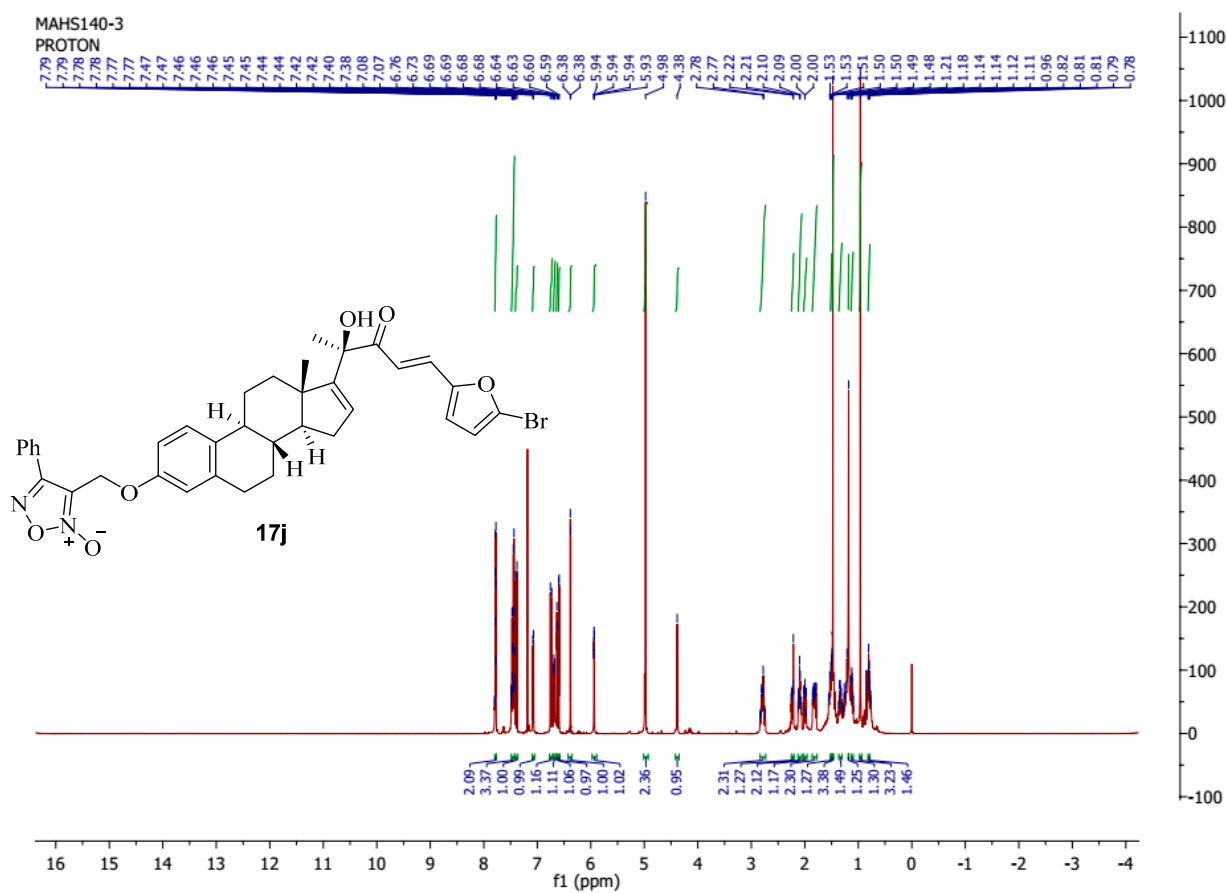

Figure S 86.  $^1\text{H}$  NMR of compound 17j.

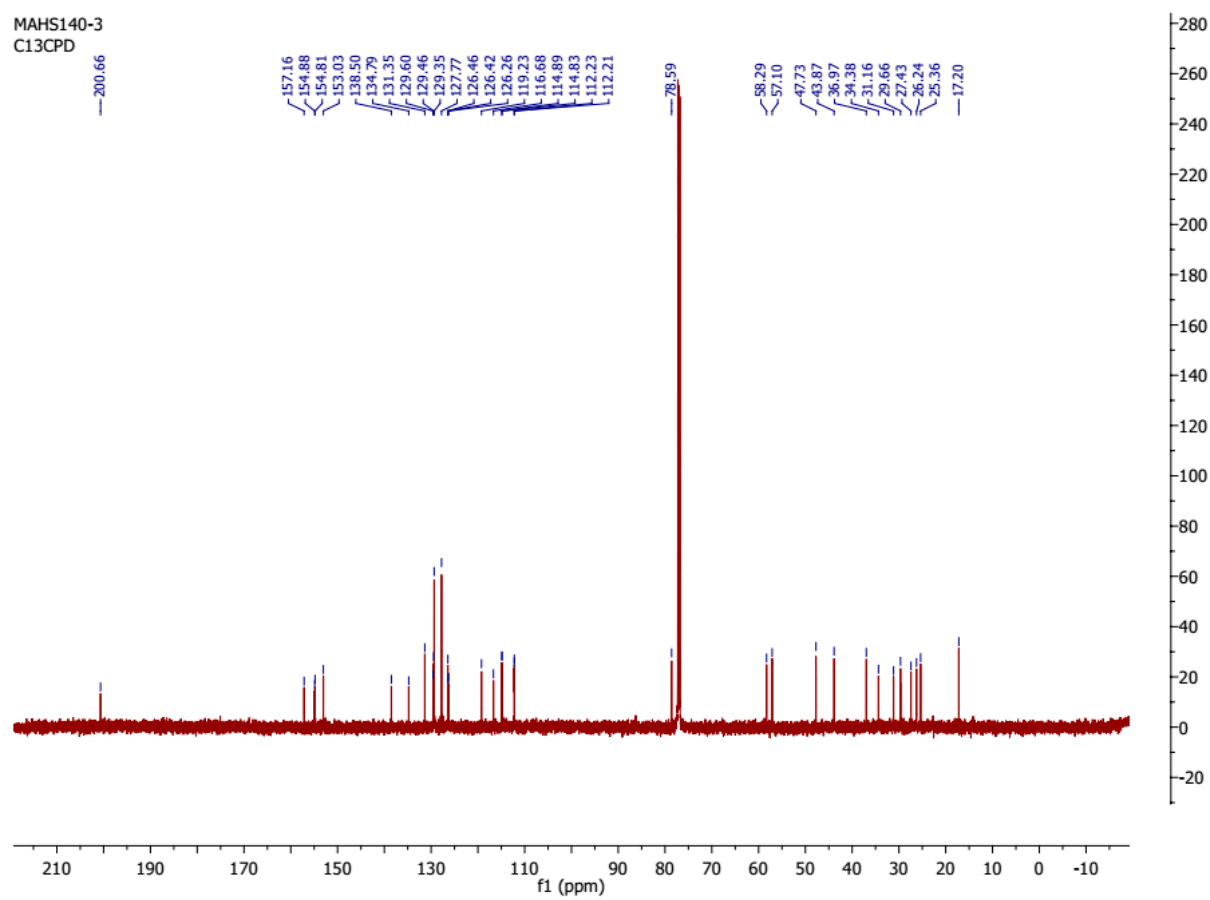

Figure S 87.  $^{13}\text{C}$  NMR of compound **17j**.

### 1.43 Compound 18

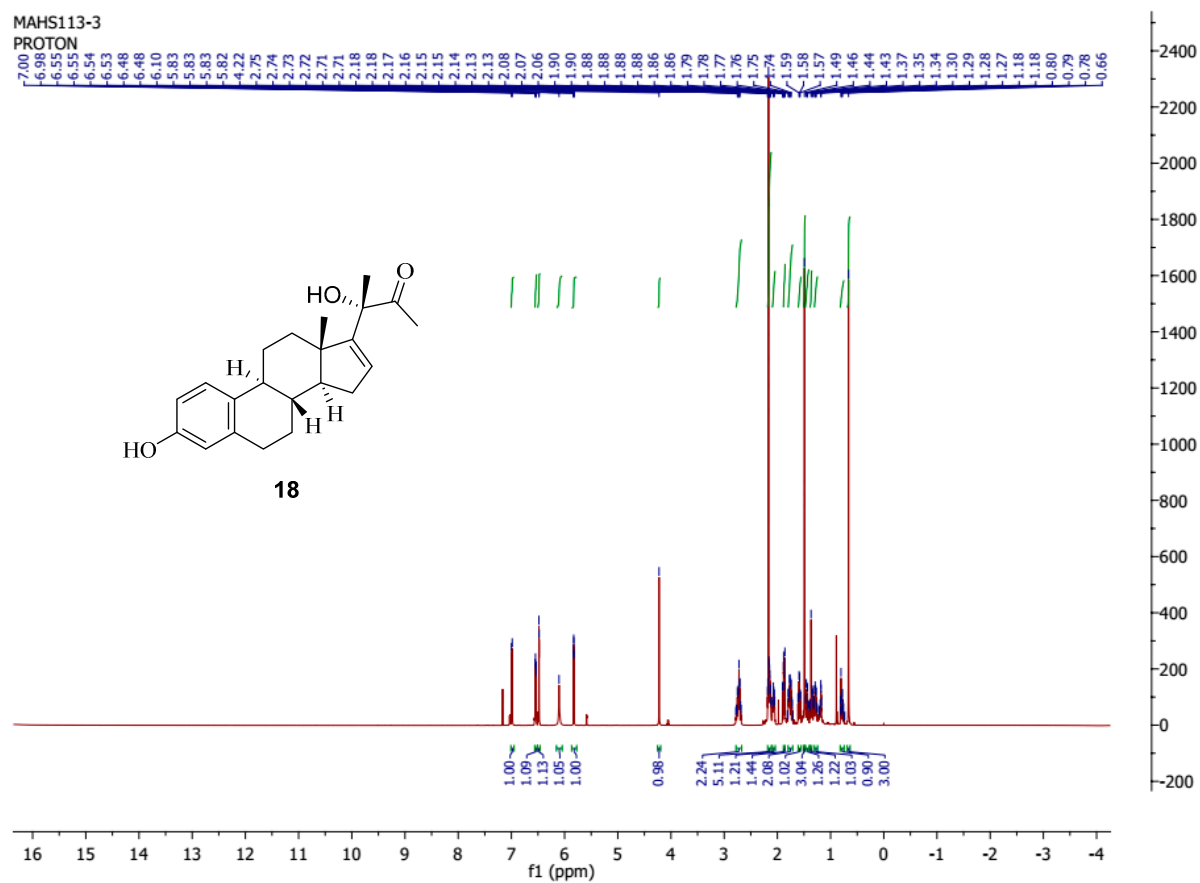

Figure S 88.  $^1\text{H}$  NMR of compound 18.



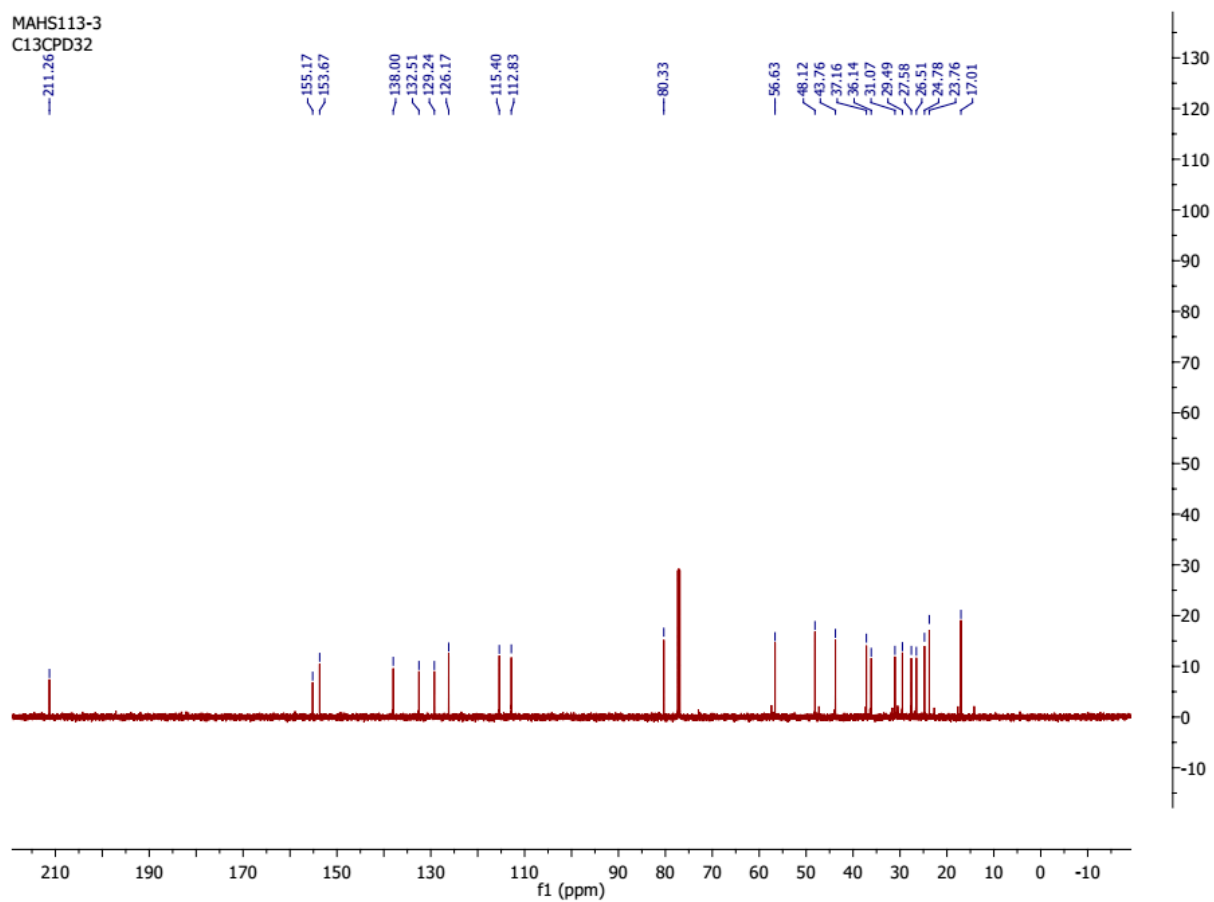

**Figure S 89.**  $^{13}\text{C}$  NMR of compound **18**.

### 1.44 Compound 19

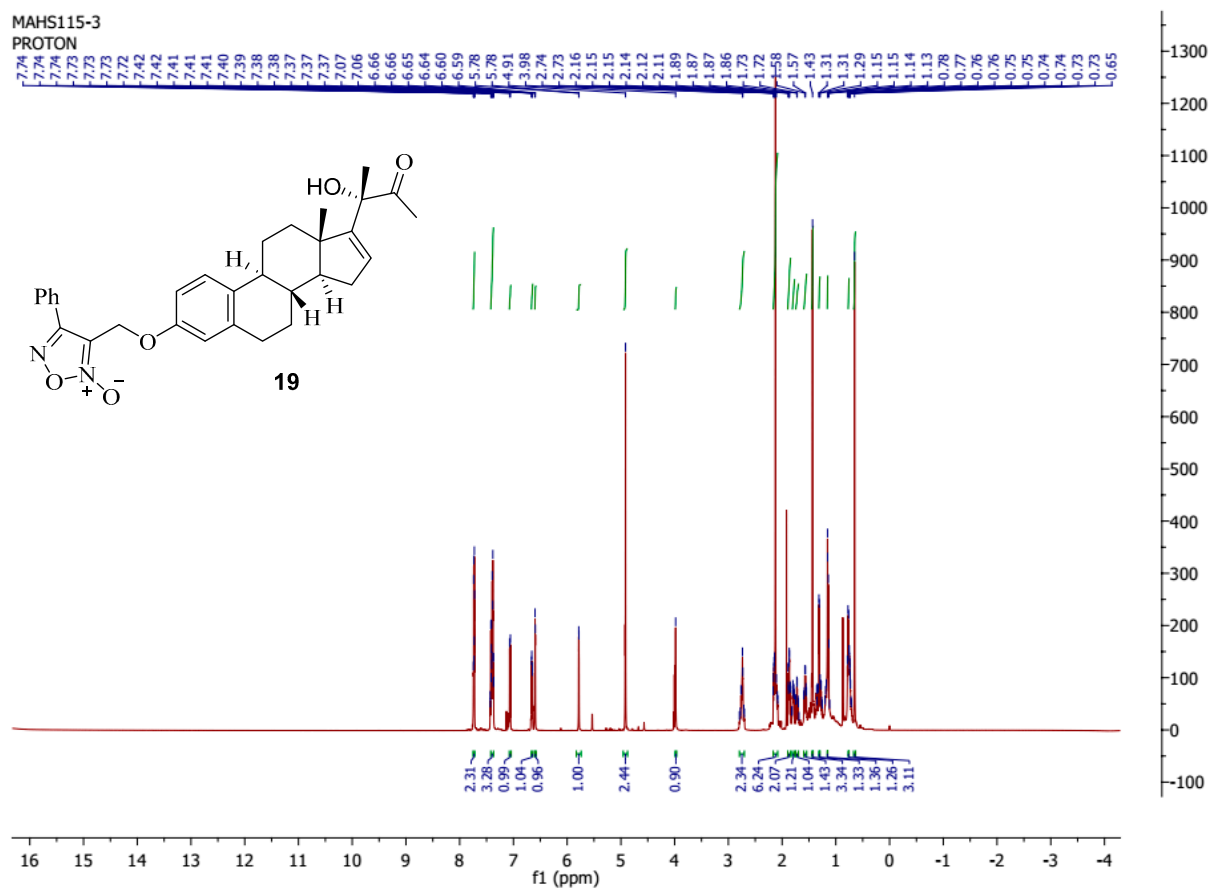

Figure S 90.  $^1\text{H}$  NMR of compound 19.

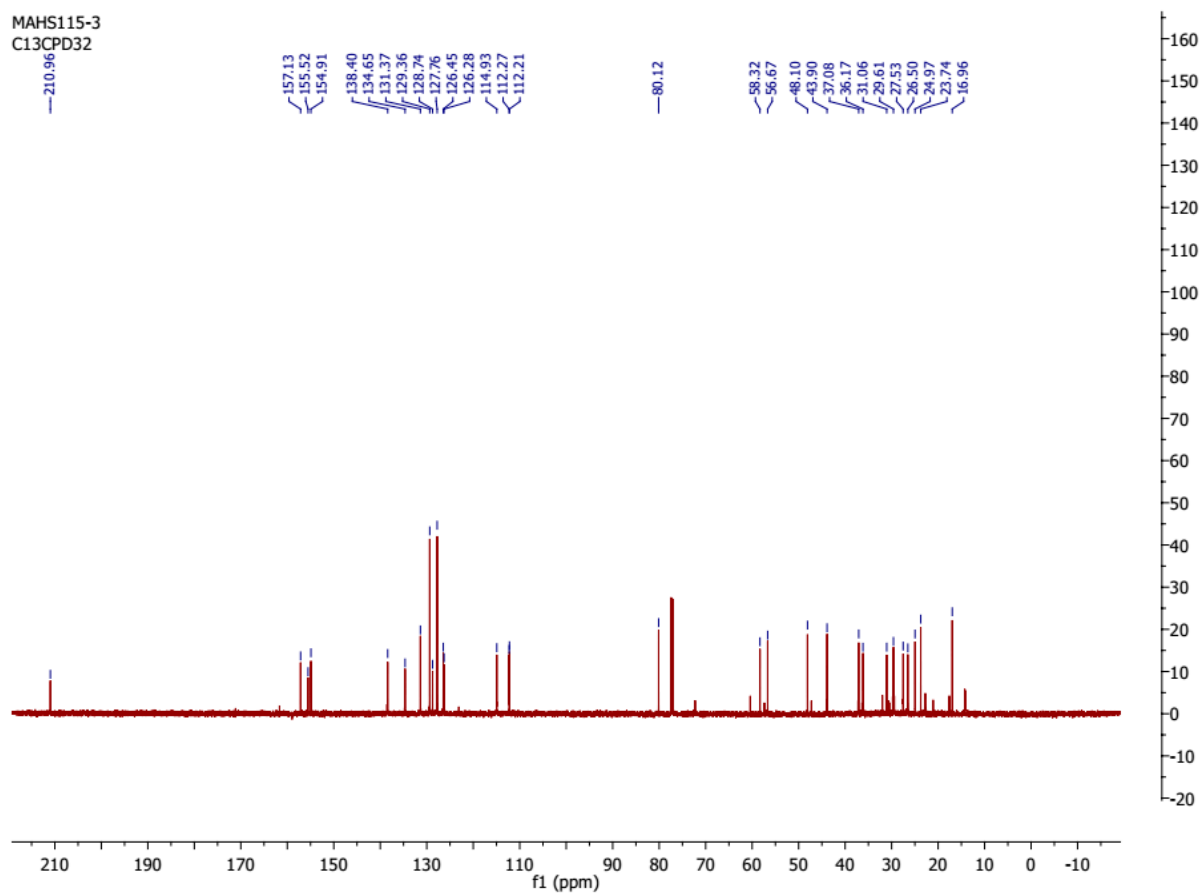

**Figure S 91.**  $^{13}\text{C}$  NMR of compound **19**.

### 1.45 Compound 20a

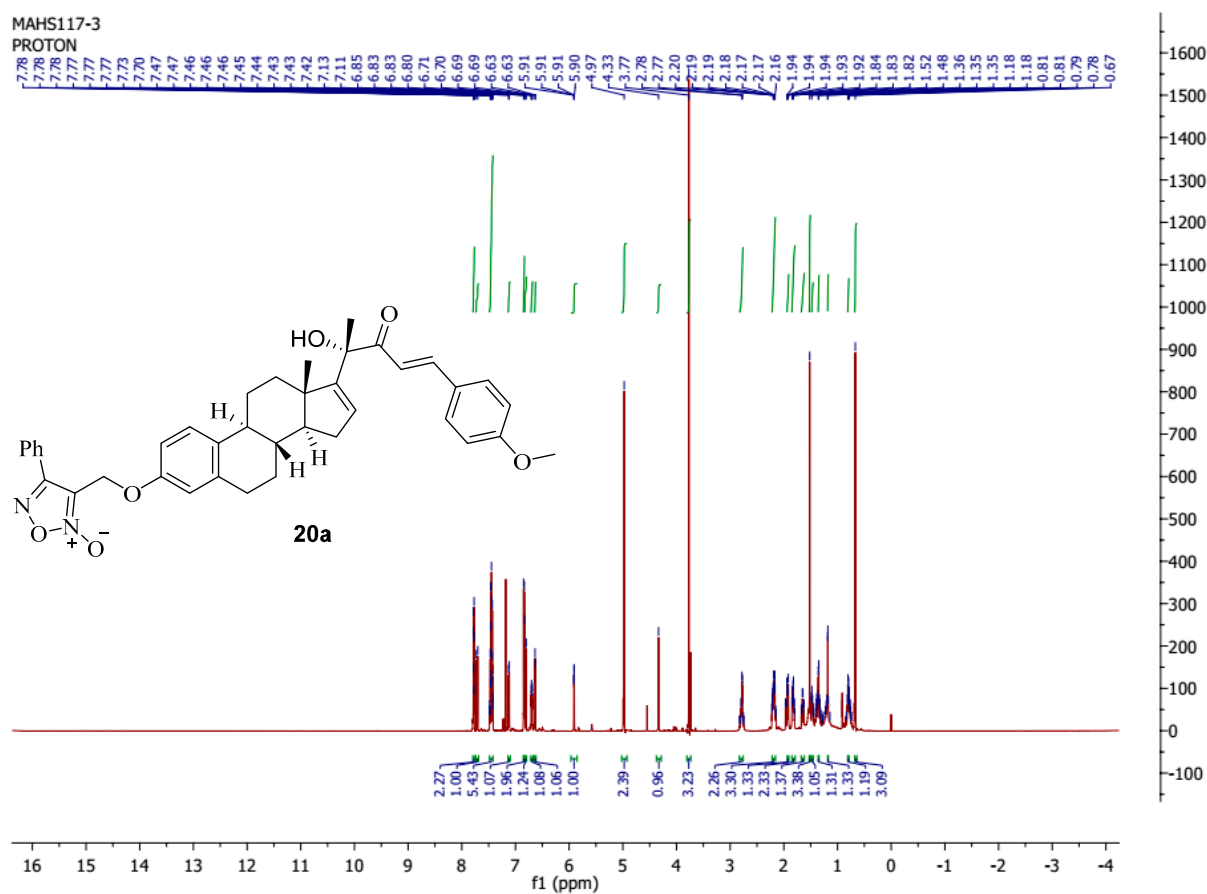

**Figure S 92.**  $^1\text{H}$  NMR of compound **20a**.

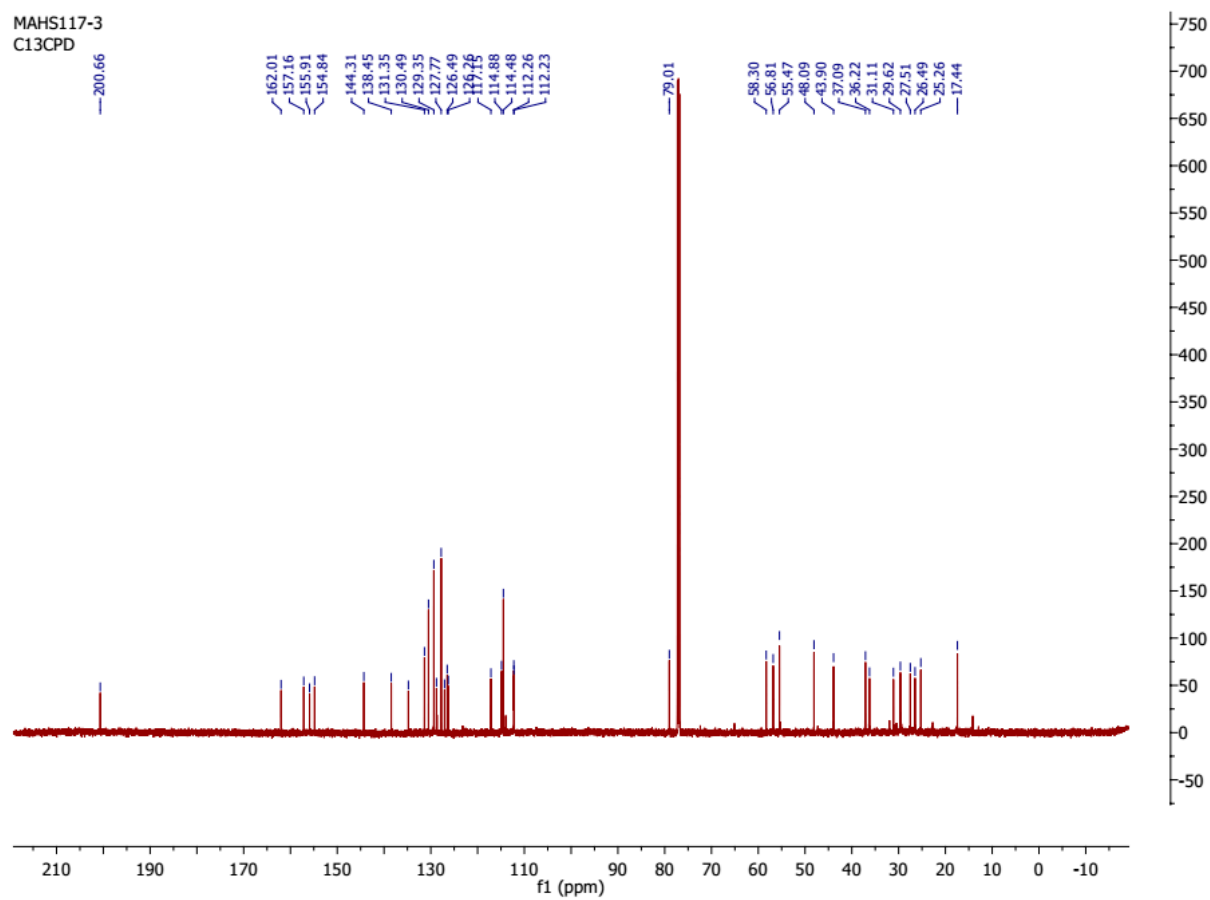

**Figure S 93.**  $^{13}\text{C}$  NMR of compound **20a**.

### 1.46 Compound 20b

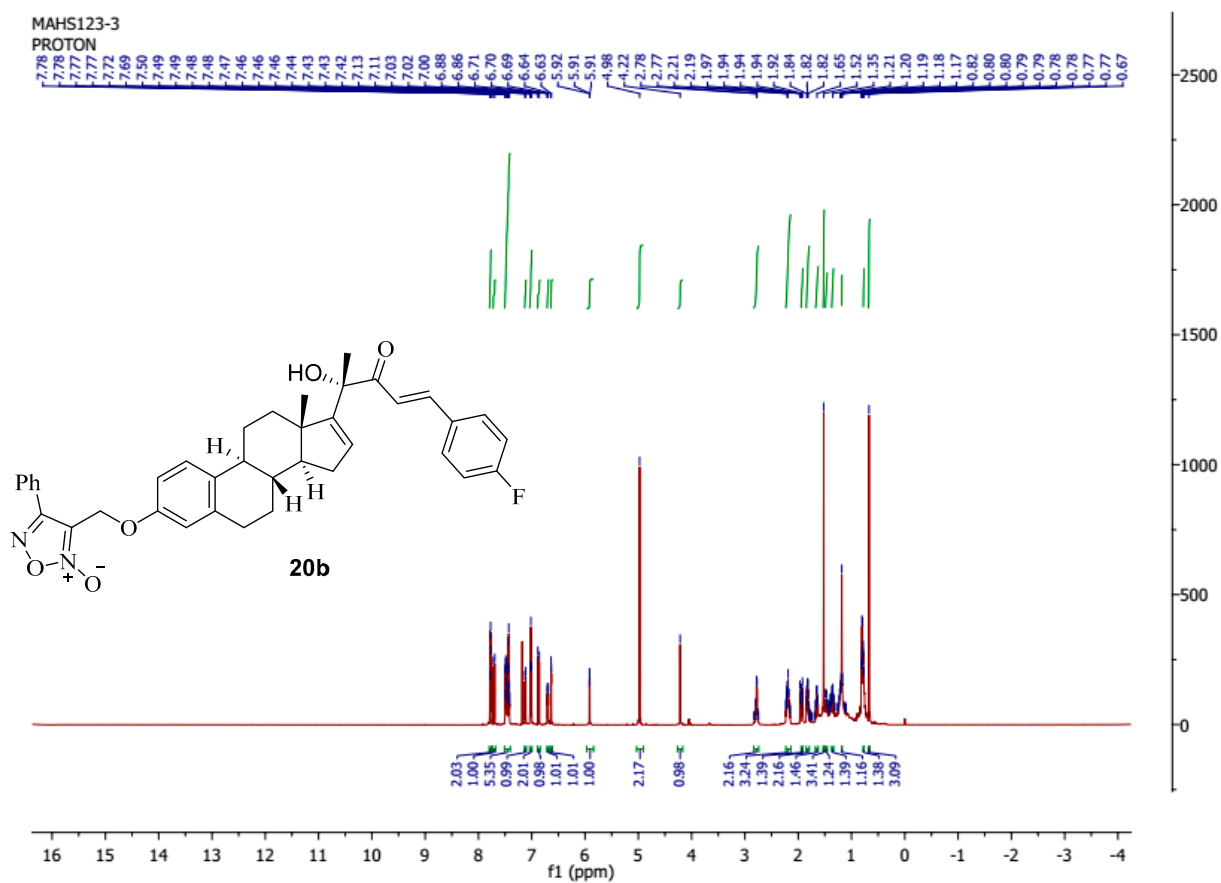

Figure S 94. <sup>1</sup>H NMR of compound **20b**.

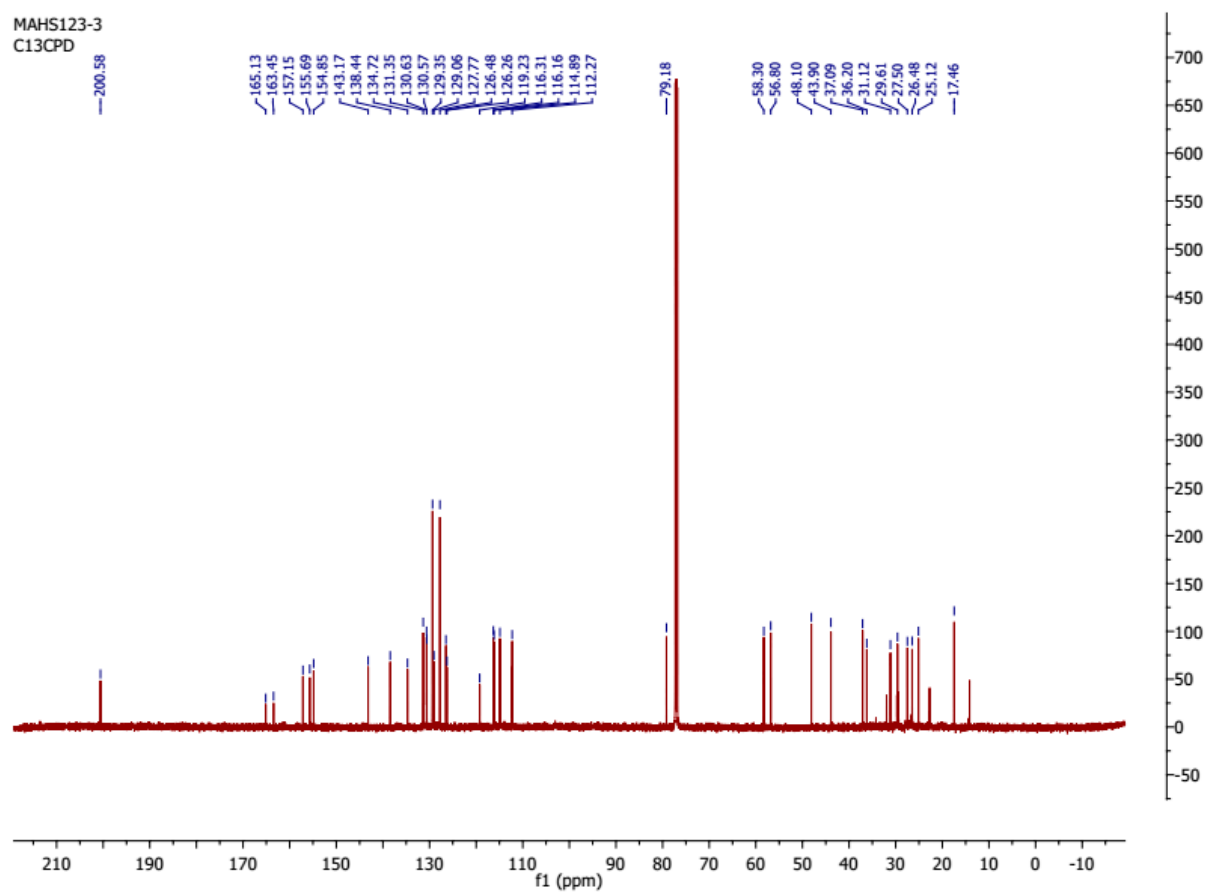

**Figure S 95.**  $^{13}\text{C}$  NMR of compound **20b**.

### 1.47 Compound 20c

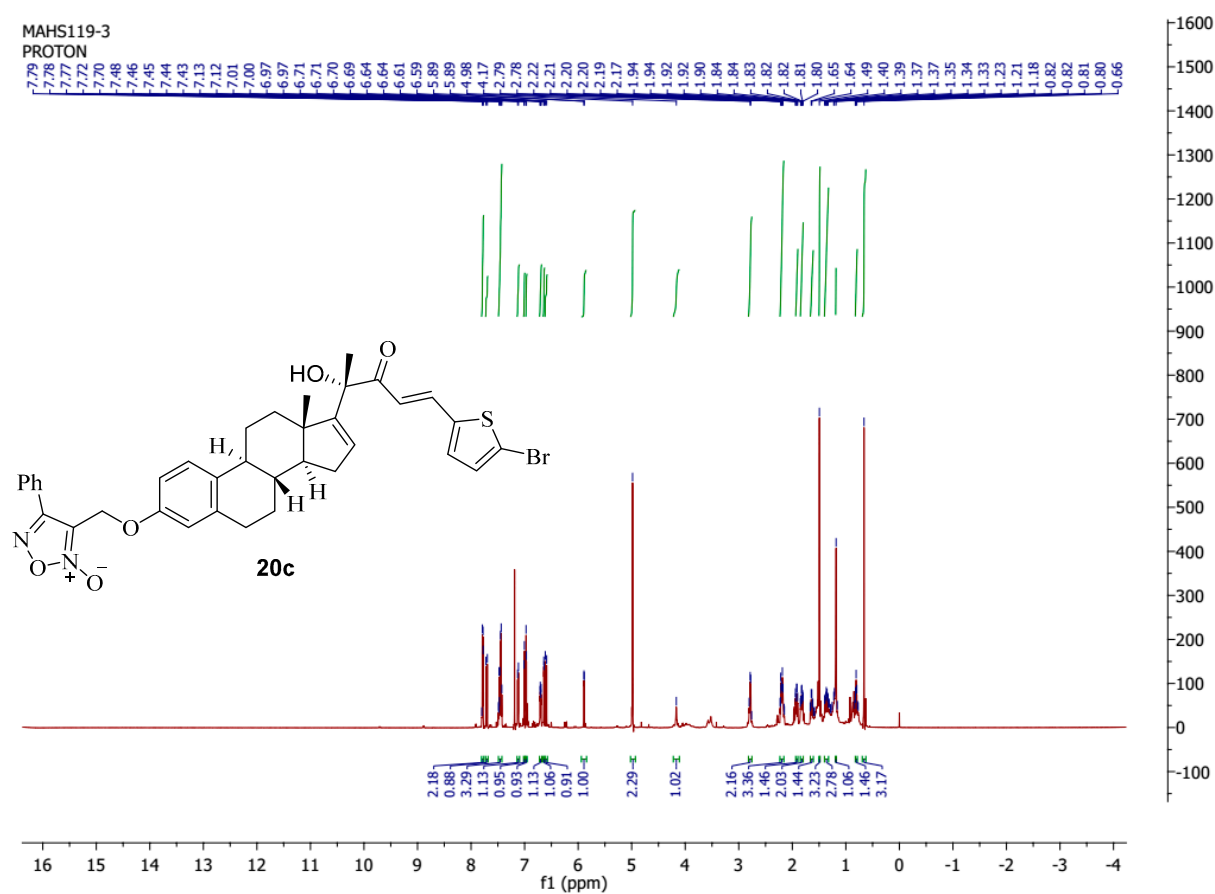

Figure S 96.  $^1\text{H}$  NMR of compound **20c**.



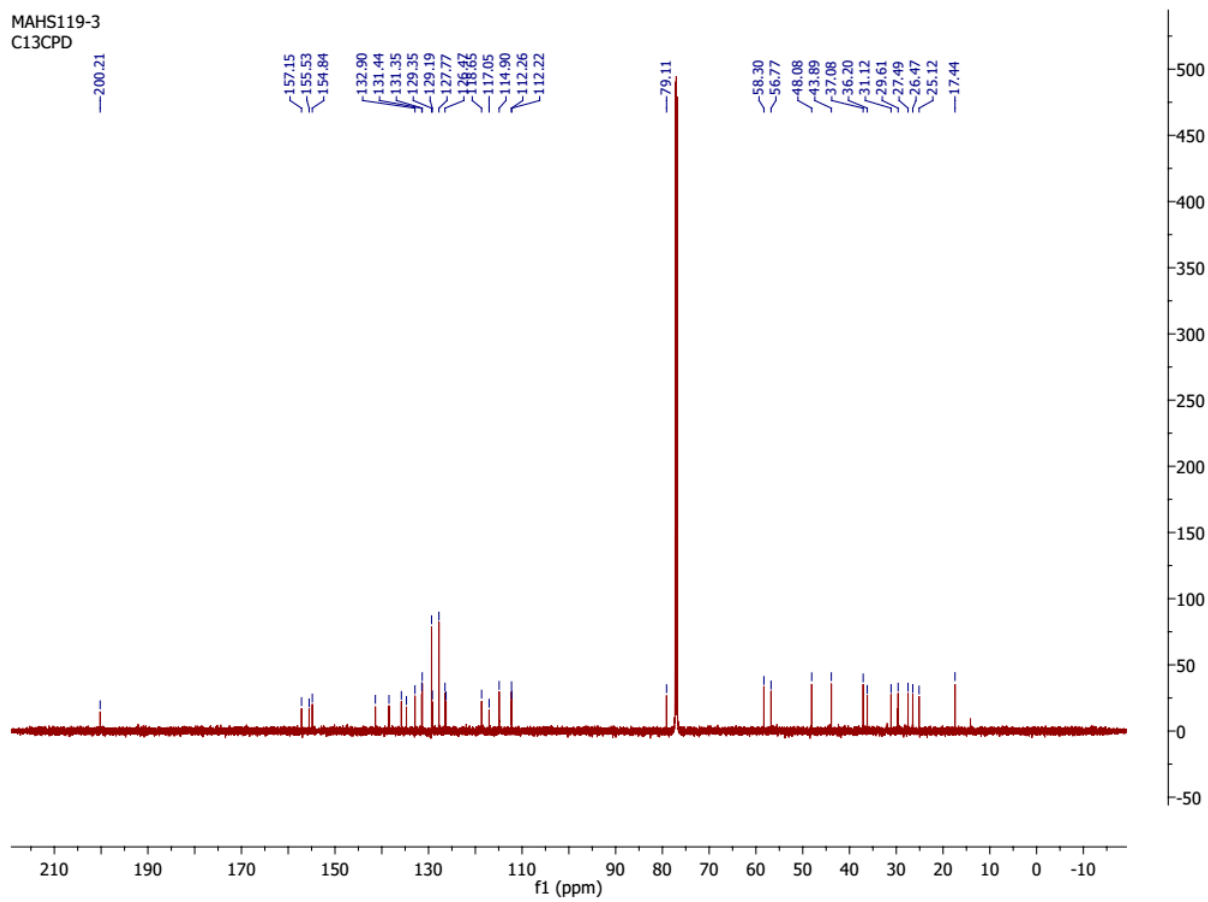

Figure S 97.  $^{13}\text{C}$  NMR of compound **20c**.

### 1.48 Compound 20d

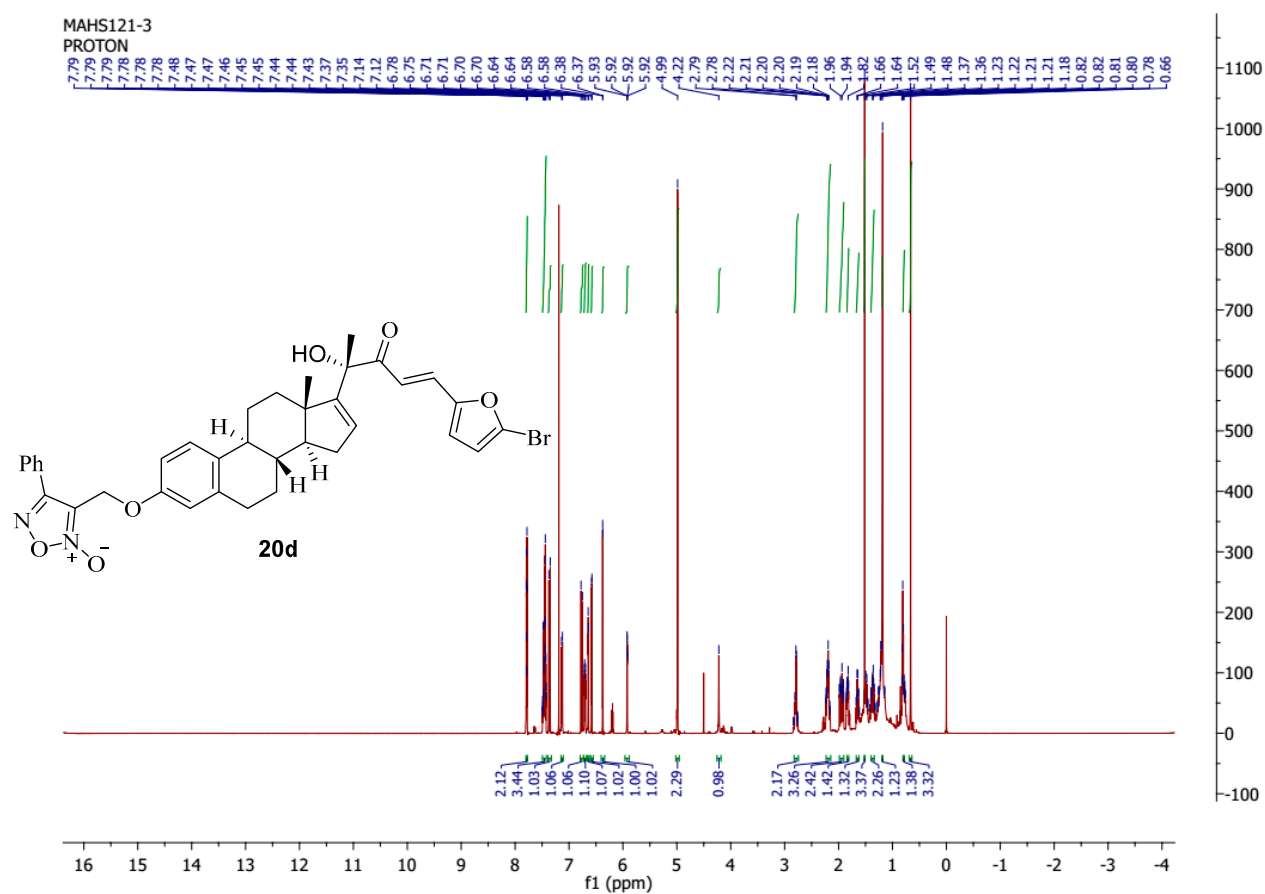

Figure S 98.  $^1\text{H}$  NMR of compound **20d**.

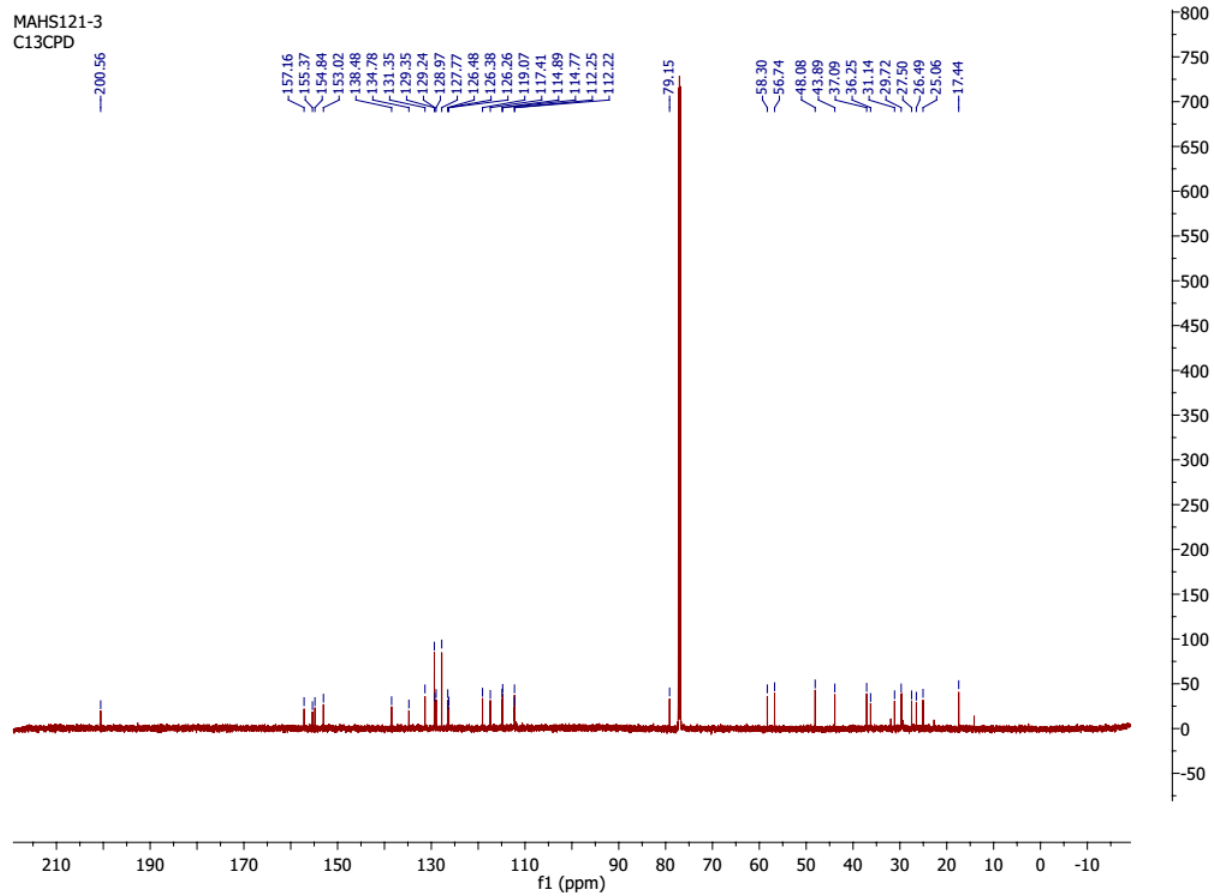

**Figure S 99.**  $^{13}\text{C}$  NMR of compound **20d**.
